# Supplementary material for: Topoisomerase VI is a chirally-selective, preferential DNA decatenase
Source: eLife. 2022 Jan 25;11:e67021. doi: 10.7554/eLife.67021 (PMC8837201; doi:10.7554/eLife.67021)
Supplement: Figure 1—source data 1. [file elife-67021-fig1-data1.csv]

Concentration_TopoVI_pM	Negative_Supercoil_Average	Positive_Supercoil_Average	fit_Negative_Supercoil_Average	fit_Positive_Supercoil_Average	Negative_Supercoil_SE	Positive_Supercoil_SE
250		2.50779	0	0		0.751604
500	1.66028	3.47618	0.0452889	0.137862	0.285195	0.761337
1000	2.85079	4.9109	0.0900382	0.271229	0.587031	0.865889
1500	3.38883	6.28026	0.134257	0.400318	0.689002	1.32448
2000	4.02	6.376	0.177956	0.52533	0.52	0.59
			0.221143	0.646456
			0.263827	0.763874
			0.306018	0.877752
			0.347723	0.988248
			0.38895	1.09551
			0.42971	1.19968
			0.470008	1.30088
			0.509852	1.39925
			0.549252	1.4949
			0.588213	1.58794
			0.626743	1.67848
			0.66485	1.76662
			0.702539	1.85244
			0.739819	1.93605
			0.776695	2.01752
			0.813175	2.09693
			0.849263	2.17437
			0.884968	2.24991
			0.920295	2.32361
			0.955249	2.39554
			0.989837	2.46577
			1.02406	2.53435
			1.05794	2.60134
			1.09146	2.6668
			1.12464	2.73078
			1.15748	2.79332
			1.18999	2.85448
			1.22216	2.9143
			1.25402	2.97282
			1.28555	3.03009
			1.31677	3.08615
			1.34769	3.14103
			1.37829	3.19477
			1.4086	3.24741
			1.43861	3.29897
			1.46833	3.3495
			1.49776	3.39902
			1.52691	3.44757
			1.55578	3.49516
			1.58438	3.54183
			1.6127	3.58761
			1.64075	3.63252
			1.66855	3.67659
			1.69608	3.71983
			1.72335	3.76228
			1.75038	3.80395
			1.77715	3.84486
			1.80368	3.88504
			1.82997	3.9245
			1.85601	3.96327
			1.88182	4.00136
			1.9074	4.03879
			1.93275	4.07557
			1.95787	4.11173
			1.98277	4.14728
			2.00745	4.18223
			2.03191	4.2166
			2.05615	4.2504
			2.08019	4.28366
			2.10401	4.31637
			2.12763	4.34855
			2.15105	4.38023
			2.17426	4.4114
			2.19727	4.44208
			2.22009	4.47228
			2.24272	4.50202
			2.26515	4.5313
			2.2874	4.56013
			2.30946	4.58853
			2.33133	4.6165
			2.35303	4.64406
			2.37454	4.67121
			2.39588	4.69796
			2.41704	4.72432
			2.43803	4.7503
			2.45885	4.7759
			2.4795	4.80115
			2.49998	4.82603
			2.5203	4.85057
			2.54046	4.87476
			2.56045	4.89862
			2.58029	4.92215
			2.59997	4.94535
			2.61949	4.96825
			2.63886	4.99083
			2.65808	5.01311
			2.67715	5.0351
			2.69608	5.05679
			2.71485	5.0782
			2.73348	5.09933
			2.75197	5.12019
			2.77032	5.14078
			2.78853	5.1611
			2.8066	5.18117
			2.82453	5.20098
			2.84233	5.22054
			2.86	5.23986
			2.87753	5.25894
			2.89493	5.27779
			2.9122	5.2964
			2.92935	5.31479
			2.94637	5.33296
			2.96327	5.35091
			2.98004	5.36864
			2.99669	5.38616
			3.01322	5.40348
			3.02963	5.42059
			3.04592	5.4375
			3.06209	5.45422
			3.07815	5.47074
			3.0941	5.48707
			3.10993	5.50322
			3.12565	5.51919
			3.14126	5.53497
			3.15676	5.55058
			3.17215	5.56601
			3.18743	5.58127
			3.20261	5.59636
			3.21768	5.61129
			3.23265	5.62606
			3.24751	5.64066
			3.26228	5.65511
			3.27694	5.6694
			3.2915	5.68354
			3.30597	5.69753
			3.32033	5.71137
			3.3346	5.72507
			3.34878	5.73862
			3.36286	5.75203
			3.37684	5.76531
			3.39073	5.77844
			3.40453	5.79145
			3.41824	5.80432
			3.43186	5.81706
			3.44539	5.82967
			3.45883	5.84215
			3.47218	5.85451
			3.48545	5.86675
			3.49863	5.87887
			3.51172	5.89086
			3.52474	5.90274
			3.53766	5.91451
			3.55051	5.92616
			3.56327	5.93769
			3.57595	5.94912
			3.58856	5.96044
			3.60108	5.97165
			3.61352	5.98275
			3.62589	5.99375
			3.63817	6.00465
			3.65039	6.01544
			3.66252	6.02613
			3.67458	6.03673
			3.68657	6.04723
			3.69848	6.05763
			3.71032	6.06794
			3.72209	6.07815
			3.73378	6.08827
			3.7454	6.0983
			3.75696	6.10824
			3.76844	6.11809
			3.77985	6.12786
			3.7912	6.13753
			3.80248	6.14713
			3.81369	6.15663
			3.82483	6.16606
			3.83591	6.1754
			3.84692	6.18467
			3.85787	6.19385
			3.86875	6.20295
			3.87957	6.21198
			3.89032	6.22093
			3.90101	6.22981
			3.91164	6.23861
			3.92221	6.24733
			3.93272	6.25598
			3.94317	6.26457
			3.95355	6.27307
			3.96388	6.28151
			3.97415	6.28988
			3.98436	6.29819
			3.99451	6.30642
			4.0046	6.31459
			4.01464	6.32269
			4.02462	6.33072
			4.03455	6.3387
			4.04442	6.3466
			4.05423	6.35445
			4.06399	6.36223
			4.07369	6.36995
			4.08334	6.37761
			4.09294	6.38521
			4.10249	6.39275
			4.11198	6.40024
			4.12142	6.40766
