# Supplementary material for: Topoisomerase VI is a chirally-selective, preferential DNA decatenase
Source: eLife. 2022 Jan 25;11:e67021. doi: 10.7554/eLife.67021 (PMC8837201; doi:10.7554/eLife.67021)
Supplement: Figure 2—source data 1. [file elife-67021-fig2-data1.csv]

DNA_Crossing_Number	Negative_Time	Positive_Time	fit_Negative_Time	fit_Positive_Time
2	161.538	80.5188	162.397	106.748
4	120.815	77.6806	156.279	102.31
6	86.1035	46.8347	150.668	98.2403
8	68.0656	19.4678	145.503	94.4946
10	33.4338	19.4297	140.735	91.0357
12	40.5848	17.2948	136.318	87.832
14	37.2713	15.944	132.215	84.8563
16	32.8161	12.043	128.395	82.085
18	33.9832	9.01042	124.828	79.4977
20	22.7043	11.9425	121.49	77.0768
			118.36	74.8067
			115.42	72.6737
			112.651	70.6657
			110.041	68.7722
			107.575	66.9835
			105.242	65.2912
			103.031	63.6877
			100.933	62.1662
			98.9402	60.7206
			97.0441	59.3453
			95.238	58.0353
			93.5158	56.7861
			91.8716	55.5935
			90.3004	54.4538
			88.7972	53.3635
			87.3579	52.3196
			85.9785	51.319
			84.6552	50.3591
			83.3847	49.4376
			82.1639	48.5521
			80.99	47.7007
			79.8603	46.8812
			78.7723	46.0921
			77.7239	45.3316
			76.7128	44.5982
			75.7371	43.8905
			74.795	43.2072
			73.8847	42.5469
			73.0048	41.9087
			72.1536	41.2913
			71.3299	40.6938
			70.5322	40.1153
			69.7595	39.5548
			69.0105	39.0115
			68.2841	38.4846
			67.5794	37.9735
			66.8954	37.4773
			66.2311	36.9955
			65.5859	36.5275
			64.9587	36.0726
			64.349	35.6303
			63.7559	35.2002
			63.1789	34.7816
			62.6172	34.3742
			62.0703	33.9775
			61.5375	33.5911
			61.0184	33.2145
			60.5124	32.8475
			60.0191	32.4897
			59.5379	32.1407
			59.0685	31.8002
			58.6103	31.4678
			58.163	31.1434
			57.7263	30.8266
			57.2996	30.5172
			56.8828	30.2148
			56.4755	29.9194
			56.0772	29.6305
			55.6879	29.3481
			55.307	29.0719
			54.9345	28.8016
			54.5699	28.5372
			54.2131	28.2784
			53.8638	28.025
			53.5218	27.7769
			53.1868	27.534
			52.8586	27.2959
			52.537	27.0627
			52.2219	26.8341
			51.913	26.6101
			51.6102	26.3904
			51.3132	26.175
			51.022	25.9638
			50.7363	25.7565
			50.4559	25.5532
			50.1808	25.3536
			49.9108	25.1578
			49.6458	24.9655
			49.3855	24.7768
			49.13	24.5914
			48.879	24.4094
			48.6324	24.2305
			48.3902	24.0548
			48.1521	23.8821
			47.9182	23.7125
			47.6882	23.5457
			47.4622	23.3817
			47.24	23.2205
			47.0214	23.062
			46.8065	22.9061
			46.595	22.7527
			46.3871	22.6019
			46.1824	22.4535
			45.9811	22.3074
			45.7829	22.1637
			45.5879	22.0222
			45.3958	21.8829
			45.2068	21.7458
			45.0207	21.6108
			44.8374	21.4779
			44.6569	21.3469
			44.4791	21.218
			44.304	21.0909
			44.1314	20.9658
			43.9614	20.8425
			43.7938	20.7209
			43.6287	20.6012
			43.466	20.4831
			43.3056	20.3668
			43.1474	20.2521
			42.9915	20.139
			42.8378	20.0275
			42.6862	19.9175
			42.5367	19.809
			42.3892	19.7021
			42.2437	19.5966
			42.1002	19.4925
			41.9586	19.3898
			41.819	19.2885
			41.6811	19.1885
			41.5451	19.0898
			41.4108	18.9925
			41.2783	18.8963
			41.1475	18.8015
			41.0184	18.7078
			40.8909	18.6153
			40.7651	18.5241
			40.6408	18.4339
			40.5181	18.3449
			40.3968	18.257
			40.2771	18.1701
			40.1589	18.0844
			40.0421	17.9996
			39.9267	17.9159
			39.8127	17.8333
			39.7	17.7516
			39.5888	17.6708
			39.4788	17.5911
			39.3701	17.5122
			39.2627	17.4343
			39.1565	17.3573
			39.0516	17.2812
			38.9478	17.2059
			38.8453	17.1316
			38.7439	17.058
			38.6436	16.9853
			38.5445	16.9134
			38.4465	16.8423
			38.3496	16.772
			38.2537	16.7025
			38.1589	16.6337
			38.0652	16.5657
			37.9724	16.4985
			37.8807	16.4319
			37.7899	16.3661
			37.7002	16.301
			37.6113	16.2365
			37.5234	16.1728
			37.4365	16.1097
			37.3504	16.0473
			37.2652	15.9855
			37.181	15.9244
			37.0976	15.8639
			37.015	15.804
			36.9333	15.7447
			36.8524	15.686
			36.7723	15.628
			36.6931	15.5705
			36.6146	15.5136
			36.5369	15.4572
			36.46	15.4014
			36.3838	15.3462
			36.3084	15.2915
			36.2337	15.2373
			36.1597	15.1836
			36.0865	15.1305
			36.014	15.0779
			35.9421	15.0258
			35.871	14.9742
			35.8005	14.923
			35.7306	14.8724
			35.6615	14.8222
			35.5929	14.7725
			35.5251	14.7233
			35.4578	14.6745
			35.3912	14.6262
			35.3251	14.5783
			35.2597	14.5308
			35.1949	14.4838
			35.1306	14.4372
