# Supplementary material for: Topoisomerase VI is a chirally-selective, preferential DNA decatenase
Source: eLife. 2022 Jan 25;11:e67021. doi: 10.7554/eLife.67021 (PMC8837201; doi:10.7554/eLife.67021)
Supplement: Figure 3—figure supplement 1—source data 1. [file elife-67021-fig3-figsupp1-data1.csv]

Force_pN	Negative_Braid_Average	Positive_Braid_Average	Negative_Supercoil_Average	Positive_Supercoil_Average
0.5	90.0271	89.9729	142.049	37.9506
1	108.391	71.609	135.931	44.0692
2	117.405	62.5951	130.064	49.9356
3	120.733	59.2667	126.778	53.2219
4	122.546	57.4539	124.546	55.4541
5	123.694	56.3063	122.892	57.108
