# Supplementary material for: Topoisomerase VI is a chirally-selective, preferential DNA decatenase
Source: eLife. 2022 Jan 25;11:e67021. doi: 10.7554/eLife.67021 (PMC8837201; doi:10.7554/eLife.67021)
Supplement: Figure 3—source data 1. [file elife-67021-fig3-data1.csv]

Time_min	Linear_Average	Relaxed_Average	Supercoiled_Average	Linear_SE	Relaxed_SE	Supercoiled_SE	fit_Linear_Average	fit_Relaxed_Average	fit_Supercoiled_Average
1	2.27833	1.44193	2.0707	0.550887	0.209799	0.800167	-1.05584	0.500043	-3.31099
2	2.90977	4.33911	8.65244	0.488075	1.092	2.88695	38.048	38.8784	169.209
4	2.99874	4.84481	23.0372	0.257885	1.37329	3.68391
6	6.7198	8.97214	29.3405	0.782883	0.360398	2.72008
8	8.63893	11.5042	43.2839	0.776851	1.70096	8.50519
10	14.0395	9.91563	54.4566	3.37268	1.65763	10.4035
15	24.1801	18.4618	76.2951	3.00914	1.74164	7.84552
20	30.0077	24.6736	86.8102	2.27005	1.06034	3.82792
30	38.6025	35.042	92.0375	2.51608	1.91275	4.12
