# Supplementary material for: Topoisomerase VI is a chirally-selective, preferential DNA decatenase
Source: eLife. 2022 Jan 25;11:e67021. doi: 10.7554/eLife.67021 (PMC8837201; doi:10.7554/eLife.67021)
Supplement: Figure 4—figure supplement 1—source data 1. [file elife-67021-fig4-figsupp1-data1.xlsx]

## Sheet: A
	Extension (nm)	Time (s)
	413.629	0
	414.851	0.25
	371.036	0.5
	331.329	0.75
	382.387	1
	394.754	1.25
	348.507	1.5
	405.325	1.75
	352.823	2
	476.185	2.25
	418.98	2.5
	452.915	2.75
	426.231	3
	482.806	3.25
	471.086	3.5
	403.244	3.75
	426.301	4
	491.25	4.25
	463.617	4.5
	478.113	4.75
	535.968	5
	563.793	5.25
	532.612	5.5
	506.674	5.75
	510.63	6
	534.18	6.25
	405.855	6.5
	499.085	6.75
	498.45	7
	521.214	7.25
	482.686	7.5
	510.029	7.75
	551.305	8
	488.192	8.25
	475.508	8.5
	486.265	8.75
	567.188	9
	560.513	9.25
	579.06	9.5
	577.287	9.75
	481.857	10
	610.044	10.25
	590.866	10.5
	567.736	10.75
	574.765	11
	656.195	11.25
	577.206	11.5
	583.504	11.75
	662.528	12
	589.032	12.25
	534.919	12.5
	685.978	12.75
	586.489	13
	634.644	13.25
	571.737	13.5
	590.561	13.75
	623.429	14
	650.589	14.25
	577.95	14.5
	598.671	14.75
	606.115	15
	702.135	15.25
	695.904	15.5
	647.003	15.75
	663.06	16
	701.57	16.25
	604.438	16.5
	627.085	16.75
	655.052	17
	678.056	17.25
	670.331	17.5
	639.008	17.75
	621.091	18
	635.324	18.25
	673.624	18.5
	598.195	18.75
	657.818	19
	606.156	19.25
	616.492	19.5
	670.342	19.75
	641.436	20
	690.294	20.25
	655.097	20.5
	691.315	20.75
	686.319	21
	723.001	21.25
	681.681	21.5
	531.066	21.75
	624.382	22
	681.164	22.25
	775.774	22.5
	654.531	22.75
	673.916	23
	720.458	23.25
	684.499	23.5
	676.413	23.75
	694.335	24
	770.524	24.25
	738.286	24.5
	697.745	24.75
	685.449	25
	661.8	25.25
	763.519	25.5
	720.278	25.75
	669.088	26

## Sheet: B
	Extension (nm)	Time (s)
	477.802	0
	474.979	0.25
	443.692	0.5
	443.097	0.75
	453.909	1
	463.729	1.25
	470.432	1.5
	497.201	1.75
	459.733	2
	440.733	2.25
	472.222	2.5
	465.02	2.75
	370.913	3
	411.686	3.25
	460.171	3.5
	427.883	3.75
	438.85	4
	490.911	4.25
	401.855	4.5
	454.208	4.75
	460.347	5
	470.718	5.25
	455.65	5.5
	472.852	5.75
	396.27	6
	434.574	6.25
	417.194	6.5
	443.735	6.75
	447.664	7
	439.484	7.25
	444.975	7.5
	478.303	7.75
	458.405	8
	417.939	8.25
	413.75	8.5
	458.247	8.75
	447.306	9
	455.104	9.25
	404.032	9.5
	443.459	9.75
	472.113	10
	480.113	10.25
	453.04	10.5
	454.409	10.75
	435.073	11
	470.879	11.25
	445.011	11.5
	462.15	11.75
	488.651	12
	482.809	12.25
	404.065	12.5
	408.89	12.75
	465.656	13
	473.598	13.25
	441.993	13.5
	441.981	13.75
	475.282	14
	433.074	14.25
	380.554	14.5
	465.472	14.75
	455.974	15
	434.698	15.25
	396.804	15.5
	448.332	15.75
	474.501	16
	473.117	16.25
	482.317	16.5
	475.154	16.75
	419.26	17
	452.208	17.25
	465.584	17.5
	458.012	17.75
	440.481	18
	492.82	18.25
	490.251	18.5
	492.606	18.75
	525.198	19
	523.212	19.25
	560.687	19.5
	532.716	19.75
	568.718	20
	467.096	20.25
	559.197	20.5
	552.638	20.75
	532.286	21
	584.436	21.25
	506.795	21.5
	572.94	21.75
	592.395	22
	591.57	22.25
	637.435	22.5
	582.556	22.75
	583.582	23
	602.641	23.25
	620.809	23.5
	633.359	23.75
	638.524	24
	651.09	24.25
	664.09	24.5
	605.897	24.75
	667.757	25
	639.167	25.25
	610.808	25.5
	654.244	25.75
	637.345	26
	603.667	26.25
	608.965	26.5
	673.888	26.75
	624.919	27
	647.739	27.25
	598.002	27.5
	539.377	27.75
	654.445	28
	633.115	28.25
	698.442	28.5
	637.923	28.75
	690.003	29
	607.095	29.25
	717.047	29.5
	626.43	29.75
	643.302	30
	649.409	30.25
	577.904	30.5
	719.86	30.75
	583.249	31
	687.247	31.25
	688.627	31.5
	651.801	31.75
	653.757	32
	621.748	32.25
	656.721	32.5
	627.508	32.75
	706.387	33
	599.158	33.25
	657.175	33.5
	613.616	33.75
	635.901	34
	599.833	34.25
	646.378	34.5
	596.621	34.75
	640.19	35
	647.451	35.25
	675.821	35.5
	695.06	35.75
	694.731	36
	649.67	36.25
	689.937	36.5
	676.348	36.75
	736.624	37
	682.517	37.25
	719.848	37.5
	697.797	37.75
	682.105	38
	665.225	38.25
	687.715	38.5
	724.211	38.75
	741.654	39
	720.976	39.25
	713.591	39.5
	696.901	39.75
	724.703	40
	715.332	40.25
	687.677	40.5
	733.488	40.75
	668.033	41
	669.02	41.25
	710.986	41.5
	767.892	41.75
	706.982	42
	704.827	42.25
	643.648	42.5
	732.287	42.75
	757.278	43
	708.097	43.25
	608.943	43.5
	687.413	43.75
	740.965	44
	681.594	44.25
	693.724	44.5
	754.882	44.75
	693.064	45
	687.299	45.25
	655.719	45.5
	670.393	45.75
	656.243	46
	715.764	46.25
	694.758	46.5
	702.295	46.75
	665.716	47
	746.234	47.25
	653.362	47.5
	638.875	47.75
	677.529	48
	698.055	48.25
	681.024	48.5
	605.268	48.75
	724.906	49
	717.014	49.25
	694.25	49.5
	673.187	49.75
	684.97	50
	693.053	50.25
	682.161	50.5
	613.349	50.75
	651.59	51
	683.304	51.25
	706.399	51.5
	629.133	51.75
	716.724	52
	675.778	52.25
	707.646	52.5
	671.239	52.75
	753.957	53
	711.612	53.25
	645.027	53.5
	626.003	53.75
	726.125	54
	682.393	54.25
	727.46	54.5
	716.637	54.75
	704.641	55
	615.889	55.25
	690.694	55.5
	696.909	55.75
	733.096	56
	695.191	56.25
	713.938	56.5
	637.893	56.75
	722.561	57
	718.664	57.25
	694.749	57.5
	691.188	57.75
	705.732	58
	675.753	58.25
	687.123	58.5
	718.937	58.75
	768.296	59
	726.232	59.25
	699.392	59.5
	771.55	59.75
	739.19	60
	751.097	60.25
	715.723	60.5
	799.768	60.75
	740.609	61
	755.469	61.25
	748.804	61.5
	771.067	61.75
	744.502	62
	773.252	62.25
	719.033	62.5
	793.996	62.75
	740.843	63
	785.156	63.25
	767.466	63.5
	753.483	63.75
	749.092	64
	767.609	64.25
	750.542	64.5

## Sheet: C
	Extension (nm)	Time (s)
	397.537	0
	404.451	0.25
	480.084	0.5
	478.585	0.75
	414.121	1
	466.76	1.25
	405.937	1.5
	451.571	1.75
	421.042	2
	391.284	2.25
	387.727	2.5
	335.158	2.75
	414.618	3
	434.67	3.25
	384.108	3.5
	447.503	3.75
	445.471	4
	444.079	4.25
	428.22	4.5
	397.433	4.75
	387.92	5
	388.825	5.25
	422.279	5.5
	363.767	5.75
	419.393	6
	424.961	6.25
	376.984	6.5
	436.565	6.75
	380.705	7
	447.386	7.25
	381.035	7.5
	410.107	7.75
	441.902	8
	480.633	8.25
	496.337	8.5
	514.14	8.75
	482.508	9
	393.666	9.25
	452.59	9.5
	476.7	9.75
	516.729	10
	500.96	10.25
	459.428	10.5
	481.61	10.75
	542.22	11
	591.149	11.25
	593.034	11.5
	590.336	11.75
	561.532	12
	567.791	12.25
	572.559	12.5
	598.105	12.75
	536.396	13
	563.016	13.25
	564.409	13.5
	569.84	13.75
	568.211	14
	563.582	14.25
	566.446	14.5
	585.626	14.75
	601.071	15
	484.372	15.25
	517.065	15.5
	494.791	15.75
	550.259	16
	539.947	16.25
	546.464	16.5
	590.099	16.75
	531.293	17
	523.665	17.25
	546.521	17.5
	520.225	17.75
	540.541	18
	596.882	18.25
	501.12	18.5
	556.344	18.75
	552.811	19
	558.814	19.25
	605.556	19.5
	540.298	19.75
	526.577	20
	612.27	20.25
	565.449	20.5
	542.006	20.75
	550.591	21
	526.638	21.25
	541.616	21.5
	575.929	21.75
	550.717	22
	533.575	22.25
	529.198	22.5
	566.461	22.75
	500.875	23
	567.174	23.25
	609.437	23.5
	502.83	23.75
	568.27	24
	546.096	24.25
	531.426	24.5
	494.685	24.75
	578.447	25
	556.248	25.25
	626.379	25.5
	580.919	25.75
	581.319	26
	532.364	26.25
	549.535	26.5
	572.052	26.75
	498.934	27
	583.715	27.25
	528.767	27.5
	559.762	27.75
	578.73	28
	607.527	28.25
	502.167	28.5
	592.3	28.75
	525.938	29
	537.158	29.25
	579.912	29.5
	529.081	29.75
	636.875	30
	562.154	30.25
	550.872	30.5
	511.396	30.75
	565.61	31
	536.719	31.25
	617.063	31.5
	586.764	31.75
	533.086	32
	593.266	32.25
	606.938	32.5
	556.251	32.75
	527.009	33
	537.356	33.25
	524.798	33.5
	613.454	33.75
	525.766	34
	545.265	34.25
	496.556	34.5
	512.116	34.75
	585.045	35
	586.487	35.25
	535.287	35.5
	540.868	35.75
	587.58	36
	561.167	36.25
	481.736	36.5
	517.002	36.75
	597.399	37
	639.898	37.25
	560.653	37.5
	614.501	37.75
	527.429	38
	592.511	38.25
	552.939	38.5
	575.76	38.75
	518.362	39
	582.693	39.25
	529.85	39.5
	558.986	39.75
	554.105	40
	581.218	40.25
	513.775	40.5
	571.446	40.75
	518.416	41
	522.177	41.25
	539.736	41.5
	607.521	41.75
	541.164	42
	535.318	42.25
	579.122	42.5
	551.538	42.75
	514.979	43
	485.064	43.25
	551.617	43.5
	528.246	43.75
	570.725	44
	559.038	44.25
	550.356	44.5
	588.366	44.75
	578.28	45
	587.077	45.25
	607.794	45.5
	652.949	45.75
	587.691	46
	605.76	46.25
	593.47	46.5
	640.649	46.75
	555.17	47
	536.891	47.25
	607.564	47.5
	630.748	47.75
	610.856	48
	647.837	48.25
	637.584	48.5
	663.667	48.75
	630.45	49
	639.107	49.25
	605.016	49.5
	614.696	49.75
	583.983	50
	610.962	50.25
	672.183	50.5
	591.657	50.75
	609.786	51
	607.448	51.25
	609.172	51.5
	560.999	51.75
	580.611	52
	615.085	52.25
	618.324	52.5
	598.362	52.75
	660.989	53
	579.466	53.25
	563.885	53.5
	531.132	53.75
	581.54	54
	655.185	54.25
	592.802	54.5
	578.271	54.75
	591.223	55
	583.101	55.25
	592.971	55.5
	643.93	55.75
	604.083	56
	564.027	56.25
	542.72	56.5
	663.59	56.75
	630.667	57
	566.207	57.25
	566.415	57.5
	651.415	57.75
	648.326	58
	682.495	58.25
	710.302	58.5
	673.031	58.75
	636.379	59
	565.27	59.25
	608.327	59.5
	679.493	59.75
	633.904	60
	670.809	60.25
	678.074	60.5
	649.252	60.75
	625.475	61
	663.924	61.25
	656.408	61.5
	636.056	61.75
	595.454	62
	677.908	62.25
	672.054	62.5
	601.088	62.75
	581.701	63
	638.074	63.25
	676.534	63.5
	619.537	63.75
	669.912	64
	640.112	64.25
	665.809	64.5
	680.962	64.75
	665.404	65
	691.755	65.25
	627.653	65.5
	727.97	65.75
	676.487	66
	625.398	66.25
	658.407	66.5
	724.332	66.75
	624.373	67
	661.777	67.25
	631.474	67.5
	724.058	67.75
	666.734	68
	594.22	68.25
	662.7	68.5
	655.559	68.75
	623.492	69
	679.797	69.25
	677.927	69.5
	657.197	69.75
	599.137	70
	619.147	70.25
	635.524	70.5
	707.435	70.75
	722.089	71
	697.484	71.25
	669.318	71.5
	633.483	71.75
	624.02	72
	688.522	72.25
	676.582	72.5
	704.782	72.75
	725.365	73
	598.091	73.25
	669.819	73.5
	731.316	73.75
	696.48	74
	680.6	74.25
	660.44	74.5
	686.09	74.75
	712.828	75
	633.264	75.25
	629.739	75.5
	684.299	75.75
	713.71	76
	714.757	76.25
	683.458	76.5
	766.352	76.75
	741.696	77
	682.707	77.25
	700.271	77.5
	683.663	77.75
	664.712	78
	684.201	78.25
	626.642	78.5
	656.809	78.75
	712.022	79
	690.274	79.25
	703.576	79.5
	662.726	79.75
	669.914	80
	690.722	80.25
	716.412	80.5
	687.128	80.75
	647.507	81
	734.012	81.25
	708.666	81.5
	671.983	81.75
	681.269	82
	731.127	82.25
	662.102	82.5
	697.263	82.75
	732.834	83
	700.525	83.25
	724.998	83.5
	684.632	83.75
	684.871	84
	676.372	84.25
	739.809	84.5
	651.512	84.75
	691.404	85
	702.523	85.25
	632.933	85.5
	736.164	85.75
	745.561	86
	681.074	86.25
	688.226	86.5
	674.239	86.75
	755.752	87
	673.569	87.25
	617.109	87.5
	721.211	87.75
	712.748	88
	693.477	88.25
	687.33	88.5
	682.506	88.75
	622.811	89
	710.778	89.25
	695.272	89.5
	707.513	89.75
	666.169	90
	700.015	90.25
	712.298	90.5
	735.07	90.75
	734.508	91
	695.058	91.25
	667.924	91.5
	722.329	91.75
	679.065	92
	617.544	92.25
	647.102	92.5
	687.38	92.75
	659.093	93
	697.18	93.25
	665.989	93.5
	714.945	93.75
	709.879	94
	669.929	94.25
	673.337	94.5
	713.838	94.75
	630.054	95
	654.555	95.25
	718.687	95.5
	714.68	95.75
	651.801	96
	689.251	96.25
	689.412	96.5
	663.45	96.75
	608.196	97
	693.853	97.25
	690.941	97.5
	715.695	97.75
	705.134	98
	668.513	98.25
	729.183	98.5
	651.122	98.75
	652.259	99
	707.847	99.25
	737.404	99.5
	697.8	99.75
	645.842	100
	771.937	100.25
	700.027	100.5
	692.508	100.75
	678.55	101
	708.142	101.25
	733.085	101.5
	630.969	101.75
	673.916	102
	711.687	102.25
	720.718	102.5
	696.573	102.75
	691.53	103
	676.491	103.25
	705.544	103.5
	698.04	103.75
	750.3	104
	665.175	104.25
	699.578	104.5
	677.409	104.75
	641.382	105
	647.659	105.25
	655.326	105.5
	721.993	105.75
	640.955	106
	709.052	106.25
	675.853	106.5
	701.664	106.75
	645.87	107
	689.93	107.25
	695.171	107.5
	732.278	107.75
	668.581	108
	642.799	108.25
	722.713	108.5
	705.412	108.75
	690.044	109
	758.054	109.25
	694.284	109.5
	704.187	109.75
	688.182	110
	725.999	110.25
	730.466	110.5
	727.061	110.75
	728.715	111
	721.684	111.25
	684.337	111.5
	655.079	111.75
	724.013	112
	715.41	112.25
	686.235	112.5
	682.022	112.75
	678.718	113
	643.679	113.25
	709.813	113.5
	693.535	113.75
	710.257	114
	640.985	114.25
	605.121	114.5
	674.602	114.75
	702.983	115
	629.42	115.25
	688.45	115.5
	712.622	115.75
	662.004	116
	746.959	116.25
	685.056	116.5
	660.278	116.75
	708.899	117
	714.816	117.25
	708.526	117.5
	725.732	117.75
	716.931	118
	731.929	118.25
	711.867	118.5
	739.719	118.75
	745.727	119
	745.088	119.25
	754.659	119.5
	745.758	119.75
	751.093	120
	769.288	120.25
	772.375	120.5
	761.675	120.75
	764.619	121
	761.622	121.25
	765.128	121.5
	797.564	121.75
	814.955	122
	742.275	122.25
	788.18	122.5
	811.253	122.75
	791.028	123
	740.371	123.25
	951.201	123.5
	930.215	123.75
	929.676	124
	937.998	124.25
	939.458	124.5
	929.554	124.75
	910.251	125
	940.27	125.25
	965.821	125.5
	965.193	125.75
	985.781	126
	955.945	126.25
	978.522	126.5
	958.134	126.75
	986.569	127
	976.086	127.25
	977.721	127.5
	961.315	127.75
	977.481	128
	999.447	128.25
	989.097	128.5
	994.664	128.75
	1004.26	129
	993.093	129.25
	981.458	129.5
	992.628	129.75
	978.49	130
	982.77	130.25
	1000.59	130.5

## Sheet: D
	Extension (nm)	Time (s)
	509.284	0
	502.08	0.25
	508.461	0.5
	482.68	0.75
	514.554	1
	490.308	1.25
	491.701	1.5
	463.569	1.75
	434.023	2
	495.032	2.25
	449.126	2.5
	524.588	2.75
	502.142	3
	479.143	3.25
	507.538	3.5
	512.534	3.75
	465.902	4
	494.144	4.25
	516.241	4.5
	517.299	4.75
	537.262	5
	510.261	5.25
	495.64	5.5
	475.033	5.75
	482.61	6
	557.576	6.25
	532.675	6.5
	501.21	6.75
	533.973	7
	502.091	7.25
	504.809	7.5
	516.436	7.75
	522.09	8
	530.94	8.25
	531.077	8.5
	622.015	8.75
	587.139	9
	559.224	9.25
	504.527	9.5
	572.393	9.75
	523.595	10
	639.85	10.25
	491.15	10.5
	595.905	10.75
	600.402	11
	558.269	11.25
	609.959	11.5
	666.046	11.75
	569.261	12
	694.668	12.25
	627.81	12.5
	624.819	12.75
	618.068	13
	668.31	13.25
	608.516	13.5
	610.941	13.75
	601.113	14
	594.493	14.25
	545.907	14.5
	620.057	14.75
	590.656	15
	568.574	15.25
	620.52	15.5
	580.145	15.75
	642.608	16
	556.568	16.25
	654.362	16.5
	559.007	16.75
	646.914	17
	600.368	17.25
	604.171	17.5
	584.224	17.75
	623.959	18
	630.451	18.25
	564.938	18.5
	612.419	18.75
	550.705	19
	592.714	19.25
	640.704	19.5
	593.244	19.75
	597.71	20
	640.117	20.25
	571.59	20.5
	623.918	20.75
	581.691	21
	589.367	21.25
	594.116	21.5
	589.203	21.75
	603.375	22
	679.079	22.25
	646.133	22.5
	599.097	22.75
	630.473	23
	635.073	23.25
	575.088	23.5
	620.685	23.75
	608.27	24
	640.608	24.25
	692.219	24.5
	625.757	24.75
	676.642	25
	644.561	25.25
	651.067	25.5
	689.193	25.75
	650.242	26
	619.192	26.25
	715.044	26.5
	760.298	26.75
	729.564	27
	663.952	27.25
	647.795	27.5
	736.186	27.75
	697.305	28
	758.083	28.25
	721.802	28.5
	812.253	28.75
	795.209	29
	761.026	29.25
	790.892	29.5
	801.008	29.75
	731.762	30
	656.114	30.25
	836.216	30.5
	806.101	30.75
	777.925	31
	788.016	31.25
	772.272	31.5
	817.848	31.75
	844.894	32
	794.446	32.25
	828.489	32.5
	793.779	32.75
	872.085	33
	838.049	33.25
	804.976	33.5
	808.884	33.75
	834.94	34
	847.674	34.25
	777.452	34.5
	785.165	34.75
	807.338	35
	809.364	35.25
	858.492	35.5
	773.765	35.75
	848.001	36
	884.461	36.25
	835.078	36.5
	880.26	36.75
	820.832	37
	837.797	37.25
	875.553	37.5
	851.188	37.75
	804.887	38
	832.744	38.25
	875.788	38.5
	862.957	38.75
	899.709	39
	876.165	39.25
	859.09	39.5
	854.7	39.75
	885.803	40
	837.321	40.25
	872.264	40.5
	889.626	40.75
	888.699	41
	913.768	41.25
	821.384	41.5
	865.137	41.75
	926.242	42
	873.707	42.25
	857.855	42.5
	929.69	42.75
	910.095	43
	882.788	43.25
	938.846	43.5
	908.543	43.75
	881.686	44
	883.638	44.25
	920.125	44.5
	864.757	44.75
	845.76	45
	828.635	45.25
	859.27	45.5
	919.547	45.75
	897.325	46
	857.552	46.25
	898.047	46.5
	844.566	46.75
	868.263	47
	920.063	47.25
	854.533	47.5
	837.814	47.75
	902.032	48
	905.376	48.25
	824.285	48.5
	868.082	48.75
	860.996	49
	824.683	49.25
	887.157	49.5
	881.211	49.75
	930.292	50
	826.564	50.25
	846.81	50.5
	892.32	50.75
	824.796	51
	936.608	51.25
	781.501	51.5
	891.913	51.75
	864.717	52
	851.669	52.25
	866.698	52.5
	835.309	52.75
	866.231	53
	926.849	53.25
	860.233	53.5
	881.617	53.75
	892.425	54
	863.065	54.25
	924.045	54.5
	938.529	54.75
	923.071	55
	872.093	55.25
	876.486	55.5
	918.65	55.75
	882.933	56
	898.477	56.25
	923.365	56.5
	869.396	56.75
	864.011	57
	860.685	57.25
	899.106	57.5
	896.858	57.75
	956.11	58
	886.756	58.25
	918.078	58.5
	875.681	58.75
	862.746	59
	937.649	59.25
	828.453	59.5
	883.981	59.75
	900.246	60
	901.593	60.25
	848.411	60.5
	887.032	60.75
	898.576	61
	919.557	61.25
	918.747	61.5
	828.112	61.75
	878.331	62
	828.69	62.25
	870.703	62.5
	891.279	62.75
	832.732	63
	864.145	63.25
	887.367	63.5
	873.821	63.75
	906.667	64
	869.936	64.25
	895.159	64.5
	903.593	64.75
	885.692	65
	880.331	65.25
	899.644	65.5
	929.389	65.75
	874.215	66
	828.485	66.25
	886.14	66.5
	870.877	66.75
	876.633	67
	894.436	67.25
	931.971	67.5
	866.289	67.75
	867.406	68
	868.304	68.25
	827.936	68.5
	860.926	68.75
	863.008	69
	867.649	69.25
	899.585	69.5
	889.685	69.75
	913.002	70
	838.73	70.25
	916.193	70.5
	914.672	70.75
	903.18	71
	820.468	71.25
	821.044	71.5
	860.856	71.75
	864.513	72
	861.875	72.25
	901.188	72.5
	878.566	72.75
	866.315	73
	785.98	73.25
	830.559	73.5
	897.191	73.75
	869.058	74
	840.744	74.25
	810.928	74.5
	830.24	74.75
	873.103	75
	906.351	75.25
	901.172	75.5
	896.159	75.75
	847.033	76
	854.887	76.25
	865.491	76.5
	896.818	76.75
	860.373	77
	887.557	77.25
	875.456	77.5
	838.849	77.75
	898.52	78
	884.234	78.25
	915.912	78.5
	872.659	78.75
	716.677	79
	835.293	79.25
	870.576	79.5
	880.429	79.75
	848.73	80
	896.582	80.25
	891.321	80.5
	834.609	80.75
	913.441	81
	918.148	81.25
	922.036	81.5
	855.921	81.75
	869.366	82
	898.591	82.25
	878.668	82.5
	898.683	82.75
	941.86	83
	890.127	83.25
	931.425	83.5
	893.16	83.75
	961.8	84
	935.209	84.25
	900.422	84.5
	924.385	84.75
	899.256	85
	897.937	85.25
	883.576	85.5
	901.734	85.75
	909.047	86
	912.914	86.25
	919.988	86.5
	824.433	86.75
	891.24	87
	852.566	87.25
	965.992	87.5
	949.431	87.75
	918.124	88
	930.622	88.25
	860.077	88.5
	930.604	88.75
	934.021	89
	892.96	89.25
	912.239	89.5
	842.866	89.75
	913.499	90
	874.63	90.25
	906.646	90.5
	895.094	90.75
	896.81	91
	855.417	91.25
	895.193	91.5
	854.136	91.75
	879.9	92
	914.18	92.25
	939.685	92.5
	905.284	92.75
	902.362	93
	900.781	93.25
	903.347	93.5
	897.464	93.75
	862.564	94
	891.669	94.25
	932.189	94.5
	931.478	94.75
	902.812	95
	860.839	95.25
	885.361	95.5
	923.578	95.75
	905.834	96
	944.423	96.25
	934.078	96.5
	880.364	96.75
	917.56	97
	941.829	97.25
	891.952	97.5

## Sheet: E
	Extension (nm)	Time (s)
	530.77	0
	523.159	0.25
	533.994	0.5
	442.345	0.75
	492.142	1
	497.545	1.25
	497.914	1.5
	492.788	1.75
	500.186	2
	425.144	2.25
	451.292	2.5
	478.645	2.75
	480.413	3
	475.247	3.25
	479.184	3.5
	490.681	3.75
	497.514	4
	442.671	4.25
	448.502	4.5
	497.001	4.75
	480.183	5
	517.11	5.25
	429.314	5.5
	465.655	5.75
	510.945	6
	502.005	6.25
	475.613	6.5
	474.211	6.75
	477.059	7
	446.574	7.25
	481.516	7.5
	483.459	7.75
	465.961	8
	534.042	8.25
	474.325	8.5
	435.178	8.75
	532.941	9
	498.499	9.25
	524.288	9.5
	476.391	9.75
	505.256	10
	485.093	10.25
	463.167	10.5
	500.615	10.75
	463.889	11
	425.708	11.25
	465.541	11.5
	556.389	11.75
	538.38	12
	450.895	12.25
	483.986	12.5
	509.804	12.75
	471.366	13
	530.513	13.25
	509.457	13.5
	496.819	13.75
	501.66	14
	523.134	14.25
	490.088	14.5
	488.815	14.75
	508.619	15
	525.188	15.25
	510.731	15.5
	453.226	15.75
	536.772	16
	516.062	16.25
	532.64	16.5
	553.658	16.75
	494.203	17
	562.106	17.25
	601.51	17.5
	542.924	17.75
	542.165	18
	503.781	18.25
	561.558	18.5
	616.414	18.75
	612.545	19
	567.294	19.25
	561.773	19.5
	540.073	19.75
	583.231	20
	524.711	20.25
	611.659	20.5
	632.52	20.75
	610.409	21
	555.769	21.25
	654.375	21.5
	661.363	21.75
	606.808	22
	601.968	22.25
	664.39	22.5
	614.3	22.75
	643.923	23
	577.126	23.25
	645.294	23.5
	693.292	23.75
	668.191	24
	651.744	24.25
	612.397	24.5
	574.707	24.75
	559.385	25
	571.475	25.25
	654.891	25.5
	524.787	25.75
	638.711	26
	676.227	26.25
	619.762	26.5
	615.259	26.75
	681.802	27
	662.897	27.25
	579.895	27.5
	643.791	27.75
	641.454	28
	667.355	28.25
	688.923	28.5
	656.314	28.75
	634.25	29
	679.482	29.25
	698.398	29.5
	689.587	29.75
	689.876	30
	701.972	30.25
	736.908	30.5
	735.885	30.75
	719.287	31
	674.277	31.25
	750.545	31.5
	786.468	31.75
	743.986	32
	732.324	32.25
	762.418	32.5
	760.657	32.75
	774.164	33
	757.989	33.25
	776.545	33.5
	810.91	33.75
	832.489	34
	818.13	34.25
	807.35	34.5
	841.278	34.75
	843.793	35
	774.413	35.25
	814.138	35.5
	758.687	35.75
	807.278	36
	773.285	36.25
	755.524	36.5
	825.856	36.75
	875.789	37
	836.656	37.25
	807.96	37.5
	839.555	37.75
	860.578	38
	863.803	38.25
	793.711	38.5
	900.242	38.75
	862.691	39
	877.575	39.25
	808.708	39.5
	907.313	39.75
	844.188	40
	859.877	40.25
	864.849	40.5
	867.469	40.75
	895.909	41
	852.21	41.25
	847.915	41.5
	838.873	41.75
	912.495	42
	821.035	42.25
	808.484	42.5
	831.144	42.75
	851.694	43
	841.338	43.25
	834.491	43.5
	834.49	43.75
	836.566	44
	859.737	44.25
	798.05	44.5
	856.212	44.75
	883.692	45
	861.755	45.25
	843.465	45.5
	810.246	45.75
	846.954	46
	847.408	46.25
	883.899	46.5
	841.073	46.75
	899.324	47
	838.09	47.25
	798.955	47.5
	832.96	47.75
	866.241	48
	838.791	48.25
	805.206	48.5
	845.255	48.75
	799.085	49
	884.166	49.25
	881.905	49.5
	843.599	49.75
	852.018	50
	835.448	50.25
	836.821	50.5
	888.482	50.75
	877.231	51
	847.419	51.25
	871.008	51.5
	880.341	51.75
	862.231	52
	865.919	52.25
	902.49	52.5
	904.743	52.75
	914.171	53
	863.965	53.25
	874.971	53.5
	915.832	53.75
	898.156	54
	893.375	54.25
	937.063	54.5
	870.737	54.75
	872.62	55
	862.401	55.25
	866.276	55.5
	881.901	55.75
	831.391	56
	887.705	56.25
	944.401	56.5
	859.784	56.75
	876.804	57
	889.12	57.25
	856.201	57.5
	923.522	57.75
	903.735	58
	918.465	58.25
	882.285	58.5
	889.125	58.75
	857.324	59
	883.022	59.25
	937.029	59.5
	902.844	59.75
	895.888	60
	837.075	60.25
	895.426	60.5
	920.705	60.75
	781.547	61
	909.369	61.25
	924.951	61.5
	900.934	61.75
	902.561	62
	907.876	62.25
	934.964	62.5
	891.366	62.75
	899.091	63
	897.597	63.25
	866.114	63.5
	915.9	63.75
	883.517	64
	863.982	64.25
	862.362	64.5
	925.819	64.75
	884.371	65
	848.467	65.25
	899.4	65.5
	880.653	65.75
	924.656	66
	890.495	66.25
	858.115	66.5
	881.441	66.75
	939.756	67
	893.273	67.25
	901.797	67.5
	862.506	67.75
	899.993	68
	853.662	68.25
	927.242	68.5
	878.858	68.75
	837.457	69
	884.216	69.25
	870.385	69.5
	913.295	69.75
	925.983	70
	920.397	70.25
	925.739	70.5
	941.237	70.75
	911.759	71
	875.709	71.25
	895.87	71.5
	932.447	71.75
	871.538	72
	892.924	72.25
	922.66	72.5
	863.512	72.75
	849.208	73
	855.245	73.25
	828.951	73.5
	910.692	73.75
	873.258	74
	927.497	74.25
	843.285	74.5
	882.771	74.75
	909.802	75
	860.711	75.25
	859.779	75.5

## Sheet: F
	Extension (nm)	Time (s)
	500.234	0
	481.968	0.25
	468.13	0.5
	468.932	0.75
	472.126	1
	468.035	1.25
	512.222	1.5
	458.128	1.75
	436.049	2
	455.645	2.25
	462.729	2.5
	464.294	2.75
	470.728	3
	453.074	3.25
	445.717	3.5
	479.052	3.75
	436.959	4
	488.468	4.25
	518.993	4.5
	479.414	4.75
	450.574	5
	494.146	5.25
	496.866	5.5
	483.381	5.75
	440.97	6
	481.798	6.25
	457.457	6.5
	435.504	6.75
	484.147	7
	400.871	7.25
	450.8	7.5
	513.528	7.75
	429.461	8
	521.074	8.25
	448.619	8.5
	517.973	8.75
	455.625	9
	466.515	9.25
	455.461	9.5
	456.519	9.75
	479.508	10
	441.242	10.25
	471.975	10.5
	455.178	10.75
	445.266	11
	446.06	11.25
	443.751	11.5
	493.757	11.75
	485.336	12
	444.982	12.25
	464.206	12.5
	528.651	12.75
	459.269	13
	504.953	13.25
	492.661	13.5
	513.146	13.75
	477.353	14
	471.527	14.25
	468.065	14.5
	518.473	14.75
	544.065	15
	489.393	15.25
	480.295	15.5
	527.477	15.75
	467.302	16
	524.857	16.25
	499.371	16.5
	500.877	16.75
	449.917	17
	486.966	17.25
	456.979	17.5
	483.361	17.75
	484.553	18
	505.941	18.25
	456.174	18.5
	426.554	18.75
	497.267	19
	437.043	19.25
	529.916	19.5
	526.63	19.75
	566.148	20
	511.738	20.25
	532.161	20.5
	463.106	20.75
	532.254	21
	516.174	21.25
	488.872	21.5
	554.321	21.75
	486.431	22
	549.349	22.25
	501.706	22.5
	557.826	22.75
	584.451	23
	541.164	23.25
	496.488	23.5
	567.227	23.75
	498.006	24
	542.544	24.25
	546.93	24.5
	612.896	24.75
	541.044	25
	581.742	25.25
	545.528	25.5
	585.821	25.75
	561.381	26
	535.725	26.25
	563.858	26.5
	526.095	26.75
	537.432	27
	607.837	27.25
	600.392	27.5
	618.787	27.75
	615.839	28
	572.232	28.25
	579.201	28.5
	548.964	28.75
	614.008	29
	599.317	29.25
	571.798	29.5
	565.56	29.75
	596.844	30
	621.865	30.25
	585.19	30.5
	545.259	30.75
	598.271	31
	525.511	31.25
	626.072	31.5
	475.332	31.75
	581.347	32
	547.473	32.25
	579.156	32.5
	549.495	32.75
	629.246	33
	542.572	33.25
	562.775	33.5
	591.161	33.75
	611.272	34
	621.596	34.25
	595.654	34.5
	556.72	34.75
	603.443	35
	494.789	35.25
	624.827	35.5
	631.677	35.75
	599.839	36
	652.925	36.25
	630.118	36.5
	591.462	36.75
	579.404	37
	636.473	37.25
	556.495	37.5
	622.258	37.75
	528.27	38
	645.661	38.25
	627.106	38.5
	588.359	38.75
	654.147	39
	679.46	39.25
	624.43	39.5
	597.961	39.75
	713.68	40
	578.962	40.25
	627.602	40.5
	670.773	40.75
	669.706	41
	671.382	41.25
	629.825	41.5
	667.938	41.75
	642.804	42
	614.308	42.25
	565.196	42.5
	568.113	42.75
	577.227	43
	500.875	43.25
	629.27	43.5
	577.83	43.75
	564.018	44
	610.365	44.25
	631.656	44.5
	587.588	44.75
	645.695	45
	612.192	45.25
	641.611	45.5
	681.815	45.75
	606.321	46
	643.371	46.25
	642.064	46.5
	547.228	46.75
	602.459	47
	593.217	47.25
	651.442	47.5
	656.113	47.75
	614.687	48
	592.989	48.25
	665.452	48.5
	603.76	48.75
	604.254	49
	578.749	49.25
	601.07	49.5
	623.046	49.75
	564.349	50
	632.14	50.25
	617.982	50.5
	613.937	50.75
	586.605	51
	565.039	51.25
	665.867	51.5
	616.892	51.75
	559.129	52
	661.038	52.25
	633.69	52.5
	602.398	52.75
	637.111	53
	620.083	53.25
	654.639	53.5
	579.687	53.75
	659.525	54
	547.268	54.25
	607.375	54.5
	630.168	54.75
	651.777	55
	590.729	55.25
	677.025	55.5
	630.195	55.75
	566.013	56
	706.73	56.25
	642.148	56.5
	573.852	56.75
	663.978	57
	595.71	57.25
	648.854	57.5
	664.51	57.75
	648.655	58
	593.645	58.25
	670.841	58.5
	591.603	58.75
	623.015	59
	617.228	59.25
	621.338	59.5
	594.026	59.75
	590.073	60
	605.593	60.25
	662.634	60.5
	586.273	60.75
	654.114	61
	579.605	61.25
	639.542	61.5
	648.846	61.75
	633.545	62
	647.717	62.25
	646.861	62.5
	687.411	62.75
	694.442	63
	614.336	63.25
	621.787	63.5
	651.311	63.75
	635.209	64
	610.805	64.25
	570.394	64.5
	636.151	64.75
	624.826	65
	596.036	65.25
	622.782	65.5
	672.872	65.75
	622.958	66
	487.284	66.25
	594.732	66.5
	636.914	66.75
	623.69	67
	594.596	67.25
	600.333	67.5
	586.864	67.75
	552.805	68
	569.24	68.25
	616.894	68.5
	594.181	68.75
	662.187	69
	641.7	69.25
	665.525	69.5
	618.127	69.75
	622.074	70
	634.483	70.25
	619.297	70.5
	638.978	70.75
	617.508	71
	608.391	71.25
	665.564	71.5
	674.107	71.75
	601.74	72
	570.908	72.25
	622.572	72.5
	591.246	72.75
	609.779	73
	602.701	73.25
	651.255	73.5
	569.032	73.75
	635.098	74
	638.734	74.25
	620.043	74.5
	629.479	74.75
	563.102	75
	626.961	75.25
	620.613	75.5
	630.571	75.75
	573.346	76
	552.569	76.25
	638.66	76.5
	664.919	76.75
	638.323	77
	580.921	77.25
	609.892	77.5
	612.857	77.75
	656.654	78
	648.704	78.25
	605.264	78.5
	644.111	78.75
	679.386	79
	564.178	79.25
	646.921	79.5
	676.159	79.75
	635.636	80
	603.983	80.25
	652.961	80.5
	663.9	80.75
	589.226	81
	670.66	81.25
	681.89	81.5
	611.509	81.75
	603.419	82
	585.318	82.25
	656.002	82.5
	627.231	82.75
	546.962	83
	671.103	83.25
	648.723	83.5
	598.708	83.75
	536.603	84
	640.027	84.25
	648.195	84.5
	689.961	84.75
	608.459	85
	550.338	85.25
	661.889	85.5
	624.463	85.75
	638.285	86
	619.293	86.25
	657.879	86.5
	626.65	86.75
	581.54	87
	568.276	87.25
	612.564	87.5
	628.692	87.75
	659.914	88
	631.914	88.25
	608.621	88.5
	651.912	88.75
	650.918	89
	635.189	89.25
	638.707	89.5
	649.869	89.75
	603.669	90
	613.288	90.25
	634.494	90.5
	597.395	90.75
	620.487	91
	579.346	91.25
	565.069	91.5
	657.659	91.75
	656.56	92
	604.268	92.25
	541.459	92.5
	569.666	92.75
	608.182	93
	691.454	93.25
	676.672	93.5
	555.748	93.75
	604.883	94
	640.066	94.25
	665.755	94.5
	662.66	94.75
	598.759	95
	610.122	95.25
	616.03	95.5
	595.598	95.75
	606.666	96
	637.81	96.25
	638.741	96.5
	641.038	96.75
	598.07	97
	551.436	97.25
	518.279	97.5
	611.7	97.75
	627.741	98
	596.57	98.25
	627.841	98.5
	652.971	98.75
	625.338	99
	655.993	99.25
	660.851	99.5
	664.213	99.75
	617.106	100
	614.246	100.25
	620.97	100.5
	663.831	100.75
	577.161	101
	654.844	101.25
	603.801	101.5
	687.903	101.75
	626.301	102
	580.724	102.25
	591.775	102.5
	600.305	102.75
	611.035	103
	571.498	103.25
	643.861	103.5
	630.621	103.75
	588.1	104
	619.081	104.25
	586.847	104.5
	617.966	104.75
	585.689	105
	552.282	105.25
	604.419	105.5
	616.586	105.75
	671.661	106
	639.984	106.25
	602.403	106.5
	646.11	106.75
	631.453	107
	660.101	107.25
	604.867	107.5
	667.09	107.75
	649.471	108
	669.115	108.25
	709.419	108.5
	698.617	108.75
	674.389	109
	635.205	109.25
	657.757	109.5
	645.741	109.75
	630.985	110
	659.128	110.25
	706.165	110.5
	629.913	110.75
	618.68	111
	624.373	111.25
	586.011	111.5
	651.158	111.75
	682.645	112
	647.527	112.25
	631.512	112.5
	691.104	112.75
	695.57	113
	627.339	113.25
	662.871	113.5
	630.645	113.75
	653.336	114
	646.058	114.25
	693.49	114.5
	702.628	114.75
	660.285	115
	719.866	115.25
	690.886	115.5
	674.408	115.75
	681.665	116
	659.978	116.25
	634.263	116.5
	636.74	116.75
	650.445	117
	695.528	117.25
	700.561	117.5
	615.933	117.75
	709.812	118
	672.328	118.25
	732.252	118.5
	630.547	118.75
	740.753	119
	578.77	119.25
	688.926	119.5
	669.901	119.75
	641.674	120
	665.136	120.25
	670.275	120.5
	660.03	120.75
	606.969	121
	693.317	121.25
	723.366	121.5
	648.628	121.75
	637.818	122
	648.43	122.25
	688.354	122.5
	759.953	122.75
	661.705	123
	682.352	123.25
	720.235	123.5
	671.534	123.75
	713.652	124
	686.538	124.25
	669.348	124.5
	667.794	124.75
	607.064	125
	779.958	125.25
	690.263	125.5
	709.357	125.75
	749.164	126
	656.076	126.25
	769.94	126.5
	730.943	126.75
	755.391	127
	703.451	127.25
	671.271	127.5
	733.521	127.75
	702.308	128
	665.813	128.25
	779.447	128.5
	763.728	128.75
	764.233	129
	765.161	129.25
	684.05	129.5
	756.345	129.75
	783.94	130
	798.514	130.25
	778.987	130.5
	804.532	130.75
	799.718	131
	811.396	131.25
	763.774	131.5
	790.635	131.75
	772.077	132
	824.979	132.25
	830.059	132.5
	778.286	132.75
	784.541	133
	762.374	133.25
	770.457	133.5
	785.763	133.75
	749.603	134
	765.156	134.25
	726.845	134.5
	770.641	134.75
	769.354	135
	741.762	135.25
	756.021	135.5
	791.693	135.75
	745.029	136
	735.528	136.25
	707.373	136.5
	782.304	136.75
	765.228	137
	785.435	137.25
	685.651	137.5
	791.686	137.75
	746.354	138
	740.592	138.25
	761.155	138.5
	756.614	138.75
	751.245	139
	794.335	139.25
	805.42	139.5
	778.495	139.75
	775.042	140
	748.979	140.25
	751.659	140.5
	724.039	140.75
	768.62	141
	725.436	141.25
	743.395	141.5
	771.108	141.75
	777.069	142
	811.422	142.25
	771.258	142.5
	679.554	142.75
	725.285	143
	784.275	143.25
	797.481	143.5
	780.043	143.75
	786.64	144
	766.315	144.25
	749.033	144.5
	723.544	144.75
	768.205	145
	770.819	145.25
	766.313	145.5
	793.118	145.75
	816.936	146
	823.898	146.25
	664.466	146.5
	742.61	146.75
	812.365	147
	737.227	147.25
	756.146	147.5
	705.93	147.75
	776.239	148
	783.128	148.25
	758.968	148.5
	818.551	148.75
	688.317	149
	775.564	149.25
	671.466	149.5
	741.532	149.75
	737.545	150
	807.841	150.25
	720.237	150.5
	750.904	150.75
	780.28	151
	796.821	151.25
	830.278	151.5
	761.037	151.75
	739.107	152
	775.352	152.25
	815.504	152.5
	737.248	152.75
	758.073	153
	711.401	153.25
	718.578	153.5
	756.884	153.75
	734.925	154
	729.91	154.25
	783.973	154.5
	811.923	154.75
	743.784	155
	715.225	155.25
	713.596	155.5
	800.566	155.75
	776.89	156
	782.371	156.25
	698.947	156.5
	754.23	156.75
	759.384	157
	793.164	157.25
	766.105	157.5
	719.114	157.75
	765.576	158
	797.151	158.25
	774.102	158.5
	760.938	158.75
	717.878	159
	775.174	159.25
	731.561	159.5
	775.838	159.75
	765.319	160
	792.21	160.25
	768.996	160.5
	746.145	160.75
	777.954	161
	777.415	161.25
	784.85	161.5
	760.845	161.75
	712.262	162
	761.886	162.25
	720.521	162.5
	735.309	162.75
	759.069	163
	739.678	163.25
	769.9	163.5
	787.395	163.75
	788.114	164
	667.888	164.25
	786.666	164.5
	755.734	164.75
	828.271	165
	741.962	165.25
	786.301	165.5
	803.419	165.75
	747.705	166
	770.035	166.25
	799.79	166.5
	742.279	166.75
	760.074	167
	724.39	167.25
	794.256	167.5
	759.445	167.75
	689.482	168
	724.847	168.25
	742.431	168.5
	782.258	168.75
	713.635	169
	780.514	169.25
	790.16	169.5
	772.255	169.75
	777.463	170
	797.523	170.25
	766.544	170.5
	777.963	170.75
	816.194	171
	750.499	171.25
	867.893	171.5
	766.08	171.75
	755.675	172
	827.602	172.25
	826.65	172.5
	754.535	172.75
	815.653	173
	799.434	173.25
	790.96	173.5
	716.587	173.75
	787.887	174
	687.641	174.25
	784.963	174.5
	827.849	174.75
	797.181	175
	758.83	175.25
	834.301	175.5
	765.243	175.75
	764.431	176
	672.791	176.25
	714.255	176.5
	793.945	176.75
	731.182	177
	873.88	177.25
	830.91	177.5
	821.894	177.75
	793.465	178
	789.563	178.25
	863.609	178.5
	810.659	178.75
	800.798	179
	757.157	179.25
	749.06	179.5
	823.199	179.75
	764.214	180
	778.01	180.25
	705.117	180.5
	842.648	180.75
	764.618	181
	819.637	181.25
	754.845	181.5
	798.377	181.75
	804.83	182
	834.962	182.25
	810.127	182.5
	854.168	182.75
	793.034	183
	804.648	183.25
	684.224	183.5
	767.443	183.75
	779.177	184
	732.783	184.25
	803.65	184.5
	822.307	184.75
	755.049	185
	751.793	185.25
	805.37	185.5
	830.701	185.75
	807.931	186
	720.656	186.25
	795.125	186.5
	782.331	186.75
	786.109	187
	766.477	187.25
	792.792	187.5
	784.505	187.75
	752.136	188
	685.421	188.25
	750.148	188.5
	844.036	188.75
	796.66	189
	720.96	189.25
	813.923	189.5
	774.412	189.75
	738.918	190
	768.269	190.25
	771.458	190.5
	740.102	190.75
	742.217	191
	746.534	191.25
	753.567	191.5
	779.917	191.75
	776.591	192
	797.214	192.25
	782.865	192.5
	763.888	192.75
	802.294	193
	796.677	193.25
	774.634	193.5
	693.176	193.75
	776.09	194
	733.059	194.25
	794.749	194.5
	726.217	194.75
	751.769	195
	782.883	195.25
	754.173	195.5
	745.785	195.75
	743.391	196
	787.757	196.25
	703.588	196.5
	816.916	196.75
	790.663	197
	811.687	197.25
	783.707	197.5
	800.973	197.75
	796.18	198
	771.799	198.25
	733.671	198.5
	816.992	198.75
	769.566	199
	786.96	199.25
	827.714	199.5
	792.02	199.75
	750.415	200
	754.159	200.25
	782.053	200.5
	790.158	200.75
	752.139	201
	731.304	201.25
	763.475	201.5
	751.699	201.75
	738.778	202
	791.168	202.25
	785.362	202.5
	684.169	202.75
	757.556	203
	823.206	203.25
	821.12	203.5
	757.478	203.75
	763.619	204
	825.641	204.25
	729.585	204.5
	744.812	204.75
	833.413	205
	725.689	205.25
	775.538	205.5
	732.983	205.75
	793.7	206
	742.725	206.25
	804.793	206.5
	793.992	206.75
	764.918	207
	731.774	207.25
	789.077	207.5
	759.717	207.75
	760.689	208
	774.238	208.25
	745.867	208.5
	782.116	208.75
	716.234	209
	822.861	209.25
	781.242	209.5
	754.446	209.75
	757.652	210
	778.19	210.25
	791.882	210.5
	762.189	210.75
	705.764	211
	784.849	211.25
	735.03	211.5
	791.156	211.75
	744.791	212
	760.538	212.25
	770.333	212.5
	765.76	212.75
	737.276	213
	717.597	213.25
	765.309	213.5
	834.737	213.75
	753.718	214
	792.979	214.25
	763.132	214.5
	789.417	214.75
	749.974	215
	805.873	215.25
	750.356	215.5
	758.39	215.75
	720.958	216
	819.158	216.25
	779.623	216.5
	724.484	216.75
	766.888	217
	743.577	217.25
	729.053	217.5
	702.467	217.75
	803.872	218
	757.569	218.25
	747.07	218.5
	781.169	218.75
	814.364	219
	742.477	219.25
	813.313	219.5
	720.51	219.75
	793.841	220
	819.279	220.25
	768.798	220.5
	797.633	220.75
	718.208	221
	843.935	221.25
	755.795	221.5
	743.602	221.75
	769.366	222
	702.01	222.25
	682.146	222.5
	803.526	222.75
	747.971	223
	754.238	223.25
	770.498	223.5
	734.825	223.75
	760.547	224
	824.78	224.25
	737.422	224.5
	644.227	224.75
	793.725	225
	773.74	225.25
	796.1	225.5
	771.183	225.75
	761.092	226
	788.52	226.25
	771.523	226.5
	813.827	226.75
	782.537	227
	785.994	227.25
	655.502	227.5
	758.003	227.75
	750.162	228
	771.044	228.25
	750.572	228.5
	773.537	228.75
	767.753	229
	784.183	229.25
	774.471	229.5
	751.392	229.75
	731.85	230
	762.489	230.25
	814.785	230.5
	817.039	230.75
	852.707	231
	691.206	231.25
	783.664	231.5
	698.653	231.75
	767.9	232
	782.64	232.25
	692.299	232.5
	810.676	232.75
	799.055	233
	746.769	233.25
	799.354	233.5
	800.343	233.75
	728.169	234
	748.923	234.25
	716.661	234.5
	796.622	234.75
	733.136	235
	752.878	235.25
	759.832	235.5
	752.175	235.75
	755.485	236
	860.845	236.25
	787.233	236.5
	752.806	236.75
	793.104	237
	827.143	237.25
	768.596	237.5
	777.63	237.75
	788.434	238
	755.46	238.25
	783.066	238.5
	788.79	238.75
	782.355	239
	736.133	239.25
	780.74	239.5
	787.688	239.75
	771.262	240
	769.501	240.25
	745.239	240.5
	777.796	240.75
	747.488	241
	751.477	241.25
	748.395	241.5
	811.757	241.75
	792.797	242
	803.764	242.25
	732.662	242.5
	755.038	242.75
	718.17	243
	774.458	243.25
	776.796	243.5
	793.412	243.75
	761.248	244
	772.117	244.25
	760.826	244.5
	727.576	244.75
	771.921	245
	726.227	245.25
	755.39	245.5
	784.216	245.75
	845.862	246
	843.811	246.25
	749.876	246.5
	796.085	246.75
	811.024	247
	841.059	247.25
	848.296	247.5
	765.404	247.75
	861.672	248
	785.688	248.25
	765.914	248.5
	796.048	248.75
	832.12	249
	807.972	249.25
	788.232	249.5
	843.09	249.75
	822.955	250
	779.989	250.25
	836.808	250.5
	819.111	250.75
	835.432	251
	788.979	251.25
	760.268	251.5
	774.844	251.75
	778.297	252
	817.45	252.25
	795.158	252.5
	799.73	252.75
	809.575	253
	791.91	253.25
	821.93	253.5
	764.443	253.75
	812.723	254
	768.528	254.25
	791.693	254.5
	761.605	254.75
	749.345	255
	859.187	255.25
	833.71	255.5
	821.826	255.75
	758.114	256
	806.376	256.25
	872.633	256.5
	754.198	256.75
	835.821	257
	784.604	257.25
	863.948	257.5
	868.018	257.75
	777.039	258
	886.189	258.25
	778.637	258.5
	808.816	258.75
	793.998	259
	839.127	259.25
	868.066	259.5
	842.794	259.75
	827.704	260
	866.114	260.25
	879.353	260.5
	770.824	260.75
	771.113	261
	800.09	261.25
	840.337	261.5
	778.218	261.75
	826.501	262
	839.884	262.25
	748.495	262.5
	836.686	262.75
	831.123	263
	763.357	263.25
	808.796	263.5
	807.189	263.75
	888.192	264
	811.233	264.25
	849.934	264.5
	781.55	264.75
	810.394	265
	797.594	265.25
	797.682	265.5
	837.197	265.75
	805.6	266
	770.865	266.25
	829.609	266.5
	848.618	266.75
	771.365	267
	833.597	267.25
	814.539	267.5
	792.57	267.75
	797.943	268
	741.47	268.25
	855.567	268.5
	808.372	268.75
	817.338	269
	800.851	269.25
	794.537	269.5
	802.931	269.75
	794.891	270
	826.861	270.25
	828.74	270.5
	839.242	270.75
	787.039	271
	792.12	271.25
	823.851	271.5
	872.369	271.75
	839.342	272
	812.877	272.25
	823.583	272.5
	768.156	272.75
	852.545	273
	849.561	273.25
	862.421	273.5
	830.881	273.75
	805.534	274
	860.999	274.25
	855.449	274.5
	803.288	274.75
	805.967	275
	794.047	275.25
	784.431	275.5
	873.123	275.75
	855.91	276
	836.492	276.25
	861.171	276.5
	861.895	276.75
	857.76	277
	865.761	277.25
	804.48	277.5
	828.93	277.75
	844.129	278
	823.025	278.25
	812.757	278.5
	817.72	278.75
	871.912	279
	847.949	279.25
	858.862	279.5
	816.477	279.75
	864.82	280
	886.119	280.25
	833.109	280.5
	841.427	280.75
	883.716	281
	868.145	281.25
	830.403	281.5
	832.675	281.75
	795.71	282
	876.315	282.25
	892.328	282.5
	776.195	282.75
	863.647	283
	869.115	283.25
	825.695	283.5
	819.129	283.75
	851.796	284
	837.776	284.25
	805.194	284.5

## Sheet: G
	Extension (nm)	Time (s)
	343.321	0
	483.493	0.25
	504.146	0.5
	417.252	0.75
	497.26	1
	482.796	1.25
	464.998	1.5
	480.306	1.75
	439.642	2
	493.477	2.25
	468.948	2.5
	483.343	2.75
	486.368	3
	467.307	3.25
	483.654	3.5
	490.281	3.75
	457.092	4
	466.378	4.25
	514.185	4.5
	447.068	4.75
	482.953	5
	464.594	5.25
	472.952	5.5
	482.47	5.75
	430.096	6
	479.63	6.25
	473.174	6.5
	513.644	6.75
	484.292	7
	454.703	7.25
	463.901	7.5
	544.757	7.75
	509.76	8
	421.606	8.25
	484.989	8.5
	456.848	8.75
	473.417	9
	471.952	9.25
	431.203	9.5
	459.901	9.75
	473.277	10
	487.971	10.25
	524.14	10.5
	514.934	10.75
	410.692	11
	490.47	11.25
	479.721	11.5
	487.234	11.75
	468.231	12
	497.693	12.25
	471.793	12.5
	516.935	12.75
	499.039	13
	429.461	13.25
	448.826	13.5
	472.772	13.75
	443.107	14
	440.282	14.25
	447.238	14.5
	436.448	14.75
	442.629	15
	462.963	15.25
	456.915	15.5
	442.018	15.75
	486.906	16
	476.82	16.25
	521.21	16.5
	448.309	16.75
	515.417	17
	468.912	17.25
	440.759	17.5
	461.834	17.75
	460.472	18
	471.262	18.25
	466.6	18.5
	466.569	18.75
	472.008	19
	480.26	19.25
	497.996	19.5
	471.169	19.75
	484.081	20
	463.422	20.25
	474.303	20.5
	497.379	20.75
	501.862	21
	462.875	21.25
	506.072	21.5
	502.889	21.75
	514.445	22
	446.43	22.25
	470.424	22.5
	502.34	22.75
	527.086	23
	451.46	23.25
	485.475	23.5
	504.271	23.75
	470.926	24
	535.101	24.25
	478.694	24.5
	514.589	24.75
	498.043	25
	488.739	25.25
	479.244	25.5
	459.204	25.75
	486.205	26
	474.887	26.25
	441.553	26.5
	484.261	26.75
	520.384	27
	484.016	27.25
	496.515	27.5
	416.143	27.75
	527.568	28
	496.238	28.25
	493.953	28.5
	479.202	28.75
	423.28	29
	519.681	29.25
	547.223	29.5
	495.122	29.75
	509.577	30
	520.415	30.25
	540.516	30.5
	490.088	30.75
	496.67	31
	493.841	31.25
	437.922	31.5
	422.243	31.75
	490.937	32
	482.678	32.25
	509.294	32.5
	451.74	32.75
	486.049	33
	506.718	33.25
	481.535	33.5
	467.242	33.75
	486.262	34
	470.568	34.25
	574.943	34.5
	499.89	34.75
	480.54	35
	558.16	35.25
	505.775	35.5
	478.37	35.75
	565.472	36
	514.393	36.25
	554.665	36.5
	538.116	36.75
	474.29	37
	493.587	37.25
	484.315	37.5
	526.649	37.75
	493.905	38
	481.766	38.25
	462.917	38.5
	489.426	38.75
	477.667	39
	598.482	39.25
	536.099	39.5
	635.846	39.75
	516.898	40
	555.383	40.25
	522.689	40.5
	540.532	40.75
	513.38	41
	579.554	41.25
	522.973	41.5
	576.454	41.75
	466.608	42
	553.394	42.25
	559.727	42.5
	487.634	42.75
	543.712	43
	562.747	43.25
	495.139	43.5
	598.294	43.75
	571.93	44
	627.839	44.25
	604.602	44.5
	642.538	44.75
	568.314	45
	616.903	45.25
	557.568	45.5
	493.622	45.75
	565.161	46
	579.359	46.25
	641.363	46.5
	594.754	46.75
	544.577	47
	625.099	47.25
	633.001	47.5
	583.096	47.75
	582.268	48
	644.097	48.25
	598.339	48.5
	562.249	48.75
	567.431	49
	610.19	49.25
	574.887	49.5
	562.529	49.75
	523.479	50
	623.795	50.25
	658.18	50.5
	596.33	50.75
	585.487	51
	572.678	51.25
	604.466	51.5
	603.72	51.75
	608.88	52
	569.268	52.25
	597.649	52.5
	520.008	52.75
	616.114	53
	610.126	53.25
	618.313	53.5
	613.373	53.75
	572.26	54
	603.308	54.25
	623.664	54.5
	610.241	54.75
	688.822	55
	657.818	55.25
	610.416	55.5
	529.625	55.75
	660.311	56
	637.245	56.25
	633.266	56.5
	554.768	56.75
	654.204	57
	617.605	57.25
	606.842	57.5
	625.398	57.75
	546.427	58
	655.865	58.25
	574.144	58.5
	605.22	58.75
	615.884	59
	568.72	59.25
	585.195	59.5
	642.762	59.75
	694.06	60
	639.687	60.25
	678.833	60.5
	581.463	60.75
	692.587	61
	590.158	61.25
	557.65	61.5
	659.845	61.75
	645.362	62
	682.144	62.25
	682.981	62.5
	656.471	62.75
	697.079	63
	690.776	63.25
	649.285	63.5
	639.575	63.75
	670.357	64
	725.338	64.25
	741.295	64.5
	672.915	64.75
	717.11	65
	694.656	65.25
	636.476	65.5
	679.446	65.75
	630.254	66
	685.588	66.25
	813.023	66.5
	681.842	66.75
	735.836	67
	758.844	67.25
	746.105	67.5
	761.527	67.75
	749.652	68
	775.117	68.25
	770.566	68.5
	749.632	68.75
	699.783	69
	732.117	69.25
	740.062	69.5
	749.029	69.75
	702.65	70
	759.727	70.25
	764.528	70.5
	591.502	70.75
	784.675	71
	771.479	71.25
	829.281	71.5
	763.985	71.75
	740.764	72
	816.993	72.25
	749.61	72.5
	765.855	72.75
	728.139	73
	732.977	73.25
	678.414	73.5
	798.189	73.75
	699.163	74
	761.955	74.25
	762.024	74.5
	718.156	74.75
	787.028	75
	791.746	75.25
	842.295	75.5
	757.598	75.75
	715.035	76
	687.282	76.25
	728.254	76.5
	756.587	76.75
	809.561	77
	782.472	77.25
	717.435	77.5
	737.936	77.75
	724.759	78
	770.592	78.25
	723.517	78.5
	715.158	78.75
	823.23	79
	759.936	79.25
	689.101	79.5
	724.133	79.75
	754.146	80
	710.804	80.25
	713.652	80.5
	763.089	80.75
	733.511	81
	770.099	81.25
	717.372	81.5
	734.69	81.75
	803.529	82
	779.099	82.25
	734.815	82.5
	840.002	82.75
	735.851	83
	736.822	83.25
	734.801	83.5
	715.67	83.75
	754.592	84
	804.621	84.25
	725.09	84.5
	761.434	84.75
	779.326	85
	766.174	85.25
	740.349	85.5
	799.408	85.75
	732.075	86
	751.339	86.25
	776.003	86.5
	736.972	86.75
	835.707	87
	697.892	87.25
	757.282	87.5
	709.8	87.75
	775.67	88
	723.684	88.25
	789.326	88.5
	666.319	88.75
	742.677	89
	728.211	89.25
	660.789	89.5
	772.862	89.75
	792.288	90
	838.988	90.25
	794.874	90.5
	797.652	90.75
	743.186	91
	735.19	91.25
	813.84	91.5
	746.24	91.75
	733.766	92
	821.666	92.25
	820.651	92.5
	789.867	92.75
	793.134	93
	851.874	93.25
	770.321	93.5
	788.234	93.75
	789.429	94
	771.202	94.25
	750.545	94.5
	814.568	94.75
	798.208	95
	791.409	95.25
	799.544	95.5
	737.438	95.75
	804.192	96
	743.827	96.25
	743.171	96.5
	760.832	96.75
	780.923	97
	709.31	97.25
	762.767	97.5
	734.008	97.75
	798.549	98
	849.227	98.25
	815.496	98.5
	812.533	98.75
	794.197	99
	781.77	99.25
	731.813	99.5
	707.296	99.75
	734.119	100
	762.425	100.25
	779.695	100.5
	825.45	100.75
	730.413	101
	797.554	101.25
	721.849	101.5
	767.25	101.75
	724.207	102
	795.062	102.25
	803.381	102.5
	760.416	102.75
	822.765	103
	753.38	103.25
	734.951	103.5
	755.844	103.75
	705.755	104
	726.05	104.25
	788.286	104.5
	764.797	104.75
	779.499	105
	773.369	105.25
	770.057	105.5
	801.75	105.75
	776.487	106
	723.818	106.25
	770.14	106.5
	749.667	106.75
	773.761	107
	730.026	107.25
	781.192	107.5
	835.308	107.75
	762.482	108
	782.171	108.25
	801.755	108.5
	803.109	108.75
	757.301	109
	767.404	109.25
	820.494	109.5
	711.449	109.75
	790.75	110
	789.02	110.25
	753.921	110.5
	785.719	110.75
	785.162	111
	763.805	111.25
	807.794	111.5
	759.13	111.75
	679.261	112
	831.94	112.25
	712.687	112.5
	779.756	112.75
	761.308	113
	750.076	113.25
	806.911	113.5
	715.35	113.75
	747.275	114
	745.043	114.25
	742.778	114.5
	728.714	114.75
	763.849	115
	757.745	115.25
	829.84	115.5
	752.942	115.75
	846.871	116
	676.661	116.25
	844.155	116.5
	764.561	116.75
	760.954	117
	692.716	117.25
	778.047	117.5
	726.202	117.75
	739.961	118
	760.345	118.25
	805.39	118.5
	744.952	118.75
	776.146	119
	830.96	119.25
	796.378	119.5
	772.478	119.75
	795.219	120
	776.8	120.25
	709.302	120.5
	802.063	120.75
	760.839	121
	837.104	121.25
	799.19	121.5
	772.783	121.75
	788.814	122
	688.325	122.25
	786.691	122.5
	740.239	122.75
	797.009	123
	767.464	123.25
	790.977	123.5
	808.783	123.75
	799.039	124
	767.659	124.25
	766.968	124.5
	780.706	124.75
	795.747	125
	760.688	125.25
	798.147	125.5
	793.214	125.75
	789.153	126
	793.709	126.25
	789.725	126.5
	798.119	126.75
	755.553	127
	751.922	127.25
	765.407	127.5
	719.362	127.75
	732.998	128
	821.419	128.25
	773.258	128.5
	722.094	128.75
	748.765	129
	792.166	129.25
	719.36	129.5
	821.449	129.75
	774.459	130
	806.214	130.25
	809.942	130.5
	725.426	130.75
	770.789	131
	800.558	131.25
	759.668	131.5
	834.061	131.75
	776.799	132
	801.308	132.25
	763.89	132.5
	796.159	132.75
	790.283	133
	790.659	133.25
	752.826	133.5
	861.432	133.75
	804.926	134
	813.534	134.25
	814.406	134.5
	843.258	134.75
	814.051	135
	759.85	135.25
	800.617	135.5
	819.916	135.75
	791.161	136
	874.921	136.25
	818.14	136.5
	798.65	136.75
	874.117	137
	842.408	137.25
	849.465	137.5
	837.312	137.75
	874.963	138
	842.718	138.25
	790.848	138.5
	792.419	138.75
	834.531	139
	810.441	139.25
	845.086	139.5
	814.953	139.75
	875.17	140
	881.259	140.25
	811.202	140.5
	815.49	140.75
	763.194	141
	839.786	141.25
	783.75	141.5
	804.133	141.75
	833.31	142
	852.767	142.25
	816.964	142.5
	817.273	142.75
	806.339	143
	741.438	143.25
	833.284	143.5
	845.636	143.75
	852.889	144
	806.734	144.25
	816.474	144.5
	825.272	144.75
	779.799	145
	790.815	145.25
	775.428	145.5
	768.767	145.75
	836.895	146
	837.928	146.25
	831.251	146.5
	737.919	146.75
	802.964	147
	858.736	147.25
	839.333	147.5
	821.45	147.75
	767.607	148
	871.105	148.25
	851.178	148.5
	826.749	148.75
	828.424	149
	796.416	149.25
	783.369	149.5
	810.887	149.75
	802.279	150
	731.008	150.25
	772.708	150.5
	793.866	150.75
	855.163	151
	810.289	151.25
	824.385	151.5
	773.326	151.75
	875.246	152
	790.246	152.25
	826.602	152.5
	806.962	152.75
	806.752	153
	799.27	153.25
	843.372	153.5
	764.2	153.75
	836.288	154
	820.888	154.25
	857.954	154.5
	852.479	154.75
	859.414	155
	808.725	155.25
	736.997	155.5
	836.15	155.75
	855.263	156
	842.425	156.25
	845.354	156.5
	811.215	156.75
	878.941	157
	825.664	157.25
	802.547	157.5
	829.365	157.75
	854.409	158
	837.977	158.25
	802.066	158.5
	822.771	158.75
	837.123	159
	873.197	159.25
	839.376	159.5
	816.313	159.75
	868.972	160
	833.13	160.25
	843.074	160.5
	855.49	160.75
	829.032	161
	787.858	161.25
	820.659	161.5
	867.002	161.75
	851.823	162
	824.25	162.25
	888.043	162.5
	850.946	162.75
	853.571	163
	809.776	163.25
	855.325	163.5
	883.059	163.75
	846.26	164
	859.102	164.25
	876.614	164.5
	852.709	164.75
	921.912	165
	898.452	165.25
	827.59	165.5
	824.466	165.75
	785.901	166
	840.185	166.25
	786.294	166.5
	878.281	166.75
	867.362	167
	868.144	167.25
	779.966	167.5
	855.797	167.75
	860.959	168
	838.216	168.25
	786.546	168.5
	847.394	168.75
	805.571	169
	865.138	169.25
	816.967	169.5
	848.602	169.75
	874.93	170
	793.367	170.25
	819.011	170.5
	825.624	170.75
	761.077	171
	812.782	171.25
	846.758	171.5
	845.128	171.75
	885.982	172
	851.455	172.25
	836.046	172.5
	852.483	172.75
	860.719	173
	863.855	173.25
	827.821	173.5
	799.952	173.75
	811.727	174
	841.336	174.25
	841.004	174.5
	861.062	174.75
	871.663	175
	887.664	175.25
	843.234	175.5
	866.224	175.75
	832.931	176
	837.305	176.25
	811.743	176.5
	879.201	176.75
	876.539	177
	867.863	177.25
	816.231	177.5
	866.075	177.75
	843.541	178
	776.723	178.25
	839.62	178.5
	781.449	178.75
	826.9	179
	838.918	179.25
	826.815	179.5
	834.916	179.75
	892.783	180
	792.952	180.25
	840.33	180.5
	828.797	180.75
	861.149	181
	840.158	181.25
	836.235	181.5
	839.215	181.75
	825.042	182
	875.98	182.25
	830.315	182.5
	860.144	182.75
	836.12	183
	790.926	183.25
	850.646	183.5
	886.057	183.75
	799.208	184
	797.271	184.25
	827.399	184.5
	871.163	184.75
	858.011	185
	842.538	185.25
	879	185.5
	877.612	185.75
	833.484	186
	810.422	186.25
	894.089	186.5
	843.908	186.75
	794.879	187
	824.774	187.25
	860.462	187.5
	818.831	187.75
	835.863	188
	874.82	188.25
	797.819	188.5
	898.079	188.75
	876.107	189
	832.475	189.25
	893.678	189.5
	881.336	189.75
	834.714	190
	882.593	190.25
	816.299	190.5
	837.165	190.75
	786.379	191
	810.311	191.25
	868.514	191.5
	877.121	191.75
	835.47	192
	832.546	192.25
	857.729	192.5
	824.47	192.75
	842.844	193
	811.959	193.25
	777.572	193.5
	721.484	193.75
	856.412	194
	850.168	194.25
	839.819	194.5
	813.178	194.75
	873.841	195
	832.17	195.25
	822.064	195.5
	877.259	195.75
	861.978	196
	842.173	196.25
	817.196	196.5

## Sheet: H
	Extension (nm)	Time (s)
	711.763	0
	614.181	0.25
	632.094	0.5
	599.528	0.75
	629.796	1
	652.704	1.25
	621.597	1.5
	571.125	1.75
	623.371	2
	603.346	2.25
	573.629	2.5
	610.866	2.75
	631.088	3
	614.721	3.25
	663.71	3.5
	684.127	3.75
	645.123	4
	673.87	4.25
	697.128	4.5
	675.466	4.75
	700.128	5
	705.168	5.25
	680.446	5.5
	735.279	5.75
	735.342	6
	721.466	6.25
	704	6.5
	713.566	6.75
	744.725	7
	712.885	7.25
	759.915	7.5
	773.662	7.75
	775.36	8
	761.722	8.25
	796.889	8.5
	804.422	8.75
	799.646	9
	781.586	9.25
	780.514	9.5
	801.002	9.75
	774.425	10
	801.658	10.25
	800.324	10.5
	792.491	10.75
	765.575	11
	804.249	11.25
	820.812	11.5
	829.062	11.75
	831.716	12
	820.926	12.25
	850.075	12.5
	835.934	12.75
	813.936	13
	835.292	13.25
	846.107	13.5
	842.688	13.75
	830.918	14
	858.722	14.25
	852.097	14.5
	860.136	14.75
	864.849	15
	897.98	15.25
	877.103	15.5
	860.623	15.75
	887.023	16
	903.126	16.25
	906.425	16.5
	888.19	16.75
	867.515	17
	890.067	17.25
	876.347	17.5
	887.788	17.75
	885.741	18
	915.97	18.25
	886.435	18.5
	898.204	18.75
	890.892	19
	880.084	19.25
	880.163	19.5
	886.798	19.75
	880.761	20
	890.786	20.25
	897.795	20.5
	875.084	20.75
	874.186	21
	882.652	21.25
	870.26	21.5
	928.822	21.75
	904.188	22
	903.648	22.25
	888.763	22.5
	872.804	22.75
	910.931	23
	904.624	23.25
	894.783	23.5
	883.66	23.75
	911.95	24
	901.111	24.25
	907.525	24.5
	901.767	24.75
	878.386	25
	885.195	25.25
	899.979	25.5
	884.837	25.75
	893.148	26
	914.11	26.25
	894.657	26.5
	862.926	26.75
	894.787	27
	873.153	27.25
	893.066	27.5
	896.903	27.75
	899.6	28
	881.066	28.25
	913.793	28.5
	900.162	28.75
	895.773	29
	903.333	29.25
	915.216	29.5
	899.011	29.75
	862.23	30
	905.025	30.25
	892.819	30.5
	911.297	30.75
	890.012	31
	913.959	31.25
	894.283	31.5
	898.884	31.75
	904.231	32
	893.421	32.25
	918.202	32.5
	905.047	32.75
	890.445	33
	913.296	33.25
	910.143	33.5
	898.991	33.75
	885.012	34
	899.612	34.25
	892.724	34.5
	901.006	34.75
	908.65	35
	891.883	35.25
	925.663	35.5
	890.433	35.75
	886.785	36
	897.911	36.25
	885.357	36.5
	908.571	36.75
	884.127	37
	903.468	37.25
	905.737	37.5
	892.947	37.75
	891.607	38
	894.908	38.25
	908.983	38.5
	890.187	38.75
	915.442	39
	902.125	39.25
	878.372	39.5
	896.73	39.75
	863.78	40
	936.302	40.25
	943.156	40.5
	942.273	40.75
	910.522	41
	945.184	41.25
	934.723	41.5
	938.892	41.75
	923.476	42
	932.792	42.25
	914.759	42.5
	921.519	42.75
	954.68	43
	931.77	43.25
	915.335	43.5
	940.677	43.75
	925.05	44
	934.396	44.25
	943.141	44.5
	916.111	44.75
	915.273	45
	919.337	45.25
	930.765	45.5
	940.545	45.75
	939.819	46
	936.264	46.25
	935.57	46.5
	898.33	46.75
	938.057	47
	917.126	47.25
	919.398	47.5
	904.997	47.75
	898.346	48
	933.567	48.25
	922.202	48.5
	924.087	48.75
	923.751	49
	923.47	49.25
	933.126	49.5
	923.071	49.75
	904.894	50
	909.575	50.25
	911.542	50.5
	944.951	50.75
	933.717	51
	911.74	51.25
	932.133	51.5
	911.134	51.75
	912.403	52
	918.24	52.25
	914.049	52.5
	915.218	52.75
	931.993	53
	918.743	53.25
	925.08	53.5
	940.714	53.75
	911.752	54

## Sheet: I
	Extension (nm)	Time (s)
	854.334	0
	891.453	0.25
	855.045	0.5
	878.877	0.75
	889.708	1
	901.162	1.25
	887.803	1.5
	893.53	1.75
	885.423	2
	894.718	2.25
	914.52	2.5
	919.869	2.75
	915.137	3
	915.588	3.25
	916.879	3.5
	919.707	3.75
	923.212	4
	935.657	4.25
	929.426	4.5
	925.845	4.75
	911.313	5
	911.455	5.25
	906.489	5.5
	901.015	5.75
	898.69	6
	912.208	6.25
	914.844	6.5
	909.331	6.75
	924.667	7
	927.027	7.25
	918.185	7.5
	919.379	7.75
	920.157	8
	920.729	8.25
	913.417	8.5
	906.835	8.75
	894.83	9
	915.35	9.25
	938.569	9.5
	934.536	9.75
	952.922	10
	943.488	10.25
	937.698	10.5
	945.501	10.75
	938.59	11
	932.487	11.25
	923.517	11.5
	940.524	11.75
	913.153	12
	934.992	12.25
	940.798	12.5
	940.368	12.75
	936.235	13
	946.996	13.25
	944.824	13.5
	935.963	13.75
	956.896	14
	947.805	14.25
	937.14	14.5
	950.029	14.75
	964.525	15
	967.545	15.25
	971.064	15.5
	955.333	15.75
	935.102	16
	949.054	16.25
	958.831	16.5
	949.394	16.75
	964.58	17
	950.474	17.25
	973.897	17.5
	969.683	17.75
	989.602	18
	971.189	18.25
	957.77	18.5
	959.246	18.75
	956.539	19
	957.626	19.25
	970.634	19.5
	957.386	19.75
	990.855	20
	976.098	20.25
	980.456	20.5
	977.582	20.75
	987.508	21
	979.137	21.25
	980.657	21.5
	988.422	21.75
	989.216	22
	982.507	22.25
	982.917	22.5
	984.587	22.75
	982.892	23
	964.906	23.25
	980.911	23.5
	940.172	23.75
	950.15	24
	966.182	24.25
	980.401	24.5
	979.181	24.75
	970.701	25
	980.11	25.25
	980.226	25.5
	969.402	25.75
	971.221	26
	974.898	26.25
	977.78	26.5
	981.203	26.75
	958.144	27
	952.663	27.25
	953.074	27.5
	963.922	27.75
	959.69	28
	958.218	28.25
	959.449	28.5
	971.517	28.75
	966.394	29
	971.578	29.25
	970.117	29.5
	959.43	29.75
	941.553	30
	964.238	30.25
	984.587	30.5
	951.425	30.75
	986.444	31
	985.299	31.25
	991.191	31.5
	993.338	31.75
	984.287	32
	992.602	32.25
	990.424	32.5
	991.812	32.75
	980.087	33
	978.712	33.25
	980.222	33.5
	961.898	33.75
	972.941	34
	993.053	34.25
	998.525	34.5
	982.926	34.75
	983.313	35
	983.279	35.25
	990.166	35.5
	953.885	35.75
	990.753	36
	999.663	36.25
	1004.78	36.5
	991.633	36.75
	996.492	37
	994.227	37.25
	1006.57	37.5
	1012.35	37.75
	1006.78	38
	1008.46	38.25
	1003.82	38.5
	1013.05	38.75
	1010.91	39
	1012.35	39.25
	1002.03	39.5
	1005.06	39.75
	1004.24	40
	969.942	40.25
	973.896	40.5
	964.733	40.75
	969.684	41
	976.631	41.25
	965.292	41.5
	968.636	41.75
	975.1	42
	1002.85	42.25
	1014.27	42.5
	1018.61	42.75
	1024.7	43
	1012.49	43.25
	1015.29	43.5
	1003.02	43.75
	1021.48	44
	998.401	44.25
	993.386	44.5
	992.622	44.75
	992.063	45
	992.38	45.25
	991.133	45.5
	996.858	45.75
	1016.89	46
	1029.48	46.25
	1020.95	46.5
	1033.41	46.75
	1018.67	47
	1019.86	47.25
	1025.02	47.5
	1017.29	47.75
	1028.78	48
	1033.78	48.25
	1018.67	48.5
	1022.82	48.75
	1018.75	49
	1040.83	49.25
	1047.39	49.5
	1049.31	49.75
	1045.43	50
	1059.73	50.25
	1050.83	50.5
	1059.04	50.75
	1046.29	51
	1045.2	51.25
	1048.3	51.5
	1056.58	51.75
	1049.7	52
	1041.39	52.25
	1045.65	52.5
	1059.99	52.75
	1049.62	53
	1044.2	53.25
	1044.64	53.5
	1041.31	53.75
	1049.8	54
	1051.26	54.25
	1042.8	54.5
	1048.89	54.75
	1046.25	55
	1041.12	55.25
	1043.61	55.5
	1043.72	55.75
	1046.48	56
	1039.85	56.25
	1045.1	56.5
	1048.11	56.75
	1041.31	57
	1040.13	57.25
	1044.01	57.5
	1060.26	57.75
	1040.18	58
	1046.31	58.25
	1058.66	58.5
	1070	58.75
	1060.5	59
	1072.15	59.25
	1050.16	59.5
	1070.35	59.75
	1057.47	60
	1060.92	60.25
	1066.48	60.5
	1054.39	60.75
	1065.59	61
	1058.76	61.25
	1071.94	61.5
	1076.88	61.75
	1066.43	62
	1076.87	62.25
	1069.69	62.5
	1082.13	62.75
	1074.05	63
	1047.38	63.25
	1070.27	63.5
	1080.43	63.75
	1084.64	64
	1032.02	64.25
	1006.29	64.5
	1021.28	64.75
	1032.91	65
	1082.3	65.25
	1100.97	65.5
	1086.44	65.75
	1025.39	66
	975.531	66.25
	964.379	66.5
	1013.81	66.75
	1073.28	67
	1084.89	67.25
	1039.11	67.5
	1098.06	67.75
	1127.96	68
	1113.72	68.25
	1124.88	68.5
	1129.09	68.75
	1074	69
	1074	69.25
	1074	69.5
	1074	69.75
	1074	70
	1074	70.25
	1074	70.5
	1074	70.75
	1074	71
	1074	71.25
	1074	71.5
	1074	71.75
	1074	72
	1074	72.25
	1074	72.5
	1074	72.75
	1074	73
	1074	73.25
	1074	73.5
	1074	73.75
	1074	74
	1074	74.25
	1074	74.5
	1074	74.75
	1074	75
	1074	75.25
	1074	75.5
	1074	75.75
	1074	76
	1074	76.25
	1074	76.5
	1074	76.75
	1074	77
	1074	77.25
