# Supplementary material for: Topoisomerase VI is a chirally-selective, preferential DNA decatenase
Source: eLife. 2022 Jan 25;11:e67021. doi: 10.7554/eLife.67021 (PMC8837201; doi:10.7554/eLife.67021)
Supplement: Figure 4—figure supplement 2—source data 1. [file elife-67021-fig4-figsupp2-data1.xlsx]

## Sheet: A
Average simulation rate (lk/min)	Simulated Average Step size (Lk)	Simulated Avegage Step size SEM (Lk)	Positive braid Average rate (Lk/Min)	Positive Braid Average Step size SEM (Lk)	positive Braid Average Step size (Lk)	Negative braid Average rate (Lk/Min)	Negative Braid Average Step size SEM (Lk)	Negative Braid Average Step size (Lk)
24	1.44561	0.026495	7.889	0.275993	3.13764
20	1.39708	0.0235798	11.9537	0.261684	3.76781	3.71315	0.338944	2.90436
17.1429	1.29919	0.0183067	18.9075	0.391394	3.6084	6.41158	0.207208	2.10386
12	1.22405	0.0161335	18.8772	0.352646	4.07883	9.18514	0.199755	2.27537
8	1.09395	0.0130847	17.7865	0.221225	3.77865	9.02527	0.257166	2.90445
5	1.10807	0.0107714	19.2125	0.226277	3.22962	8.32256	0.222588	2.98055

## Sheet: B
Average simulation rate (lk/min)	Simulation pause time (s)	Simulation pause time SEM (s)	Negative braid Average rate (Lk/Min)	Negative braid pause time (s)	Negative braid pause time SEM (s)	Positive braid Average rate (Lk/Min)	Pegative braid pause time (s)	Positive braid pause time SEM (s)
24	3.1	0.1				7.889	21.9925	4.3641
20	3.5	0.1	3.71315	49.4054	16.897	11.9537	19.6852	4.43747
17.1429	4.1	0.1	6.41158	30.385	6.97755	18.9075	12.8947	2.7957
12	5.7	0.2	9.18514	14.0393	2.92386	18.8772	7.53766	1.31383
8	5.2	0.2	9.02527	15.6422	2.13501	17.7865	11.7252	2.99461
5	12.7	0.4	8.32256	13.2386	0.644823	19.2125	10.2258	1.80145

## Sheet: C
Average simulation rate (lk/min)	Simulated burst probabity	Negative braid Average rate (Lk/Min)	Negative braid burst probability	Positive braid Average rate (Lk/Min)	Positive braid burst probability
24	0.3			7.889	0.870968
20	0.28	3.71315	0.8	11.9537	0.95122
17.1429	0.25	6.41158	0.611111	18.9075	0.868421
12	0.19	9.18514	0.75	18.8772	0.961538
8	0.12	9.02527	0.758621	17.7865	0.975
5	0.1	8.32256	0.836364	19.2125	0.891304
