# Supplementary material for: Topoisomerase VI is a chirally-selective, preferential DNA decatenase
Source: eLife. 2022 Jan 25;11:e67021. doi: 10.7554/eLife.67021 (PMC8837201; doi:10.7554/eLife.67021)
Supplement: Figure 4—figure supplement 3—source data 1. [file elife-67021-fig4-figsupp3-data1.xlsx]

## Sheet: A
8 Lk/Min simulation T-test Y values	8 Lk/Min simulation T-Test time points	8 Lk/Min simulation Simulated data without noise (0.005 s per point time scaling)	8 Lk/Min simulation Simulated data (0.005 s per point time scaling)
0.210181	0	0	-58.2429
0.210181	0.05	0	-0.455094
0.210181	0.1	0	-74.1022
0.210181	0.15	0	32.4442
0.210181	0.2	0	99.7069
0.210181	0.25	0	-37.1924
0.210181	0.3	0	-43.7758
0.210181	0.35	0	-36.8117
0.210181	0.4	0	47.5684
0.210181	0.45	0	24.3389
0.210181	0.5	0	-5.72086
0.210181	0.55	0	-27.0607
0.210181	0.6	0	32.4256
0.210181	0.65	0	50.3921
0.210181	0.7	0	98.4279
0.210181	0.75	0	70.4677
0.210181	0.8	0	-55.3832
0.210181	0.85	0	-9.59232
0.210181	0.9	0	-70.6429
0.210181	0.95	0	10.8081
0.210181	1	0	-2.51526
0.210181	1.05	0	-32.0637
0.210181	1.1	0	21.6767
0.210181	1.15	0	21.6462
0.210181	1.2	0	90.2557
0.210181	1.25	0	7.55176
0.210181	1.3	0	104.436
0.210181	1.35	0	13.8457
0.210181	1.4	0	19.3368
0.210181	1.45	0	-60.9235
0.210181	1.5	0	88.7153
0.210181	1.55	0	-73.3048
0.210181	1.6	0	-67.6821
0.210181	1.65	0	65.9371
0.210181	1.7	0	9.53201
0.210181	1.75	0	-8.28139
0.210181	1.8	0	22.2165
0.210181	1.85	0	34.2998
0.210181	1.9	0	-62.7064
0.210181	1.95	0	17.1325
0.210181	2	0	8.3199
0.888843	2.05	0	-27.4968
3.72135	2.1	0	10.6801
6.55386	2.15	0	-58.5811
9.38637	2.2	0	59.6331
12.2189	2.25	0	64.3755
15.0514	2.3	0	-55.569
17.8839	2.35	0	29.564
20.7164	2.4	0	15.9633
23.5489	2.45	0	-76.6869
26.3814	2.5	0	7.9678
29.2139	2.55	0	-41.0409
32.0465	2.6	0	39.2417
34.879	2.65	0	-36.9694
35.0569	2.7	0	-37.9393
35.0569	2.75	0	45.2062
35.0569	2.8	0	33.6566
35.0569	2.85	0	58.7483
35.0569	2.9	0	-104.233
35.0569	2.95	0	13.0388
35.0569	3	0	30.9718
35.0569	3.05	0	10.3853
35.0569	3.1	0	-24.5751
35.0569	3.15	0	52.8507
35.0569	3.2	0	-12.6014
35.0569	3.25	0	-30.5891
35.0569	3.3	0	21.4445
35.0569	3.35	0	-24.5358
35.0569	3.4	0	-50.9972
35.0569	3.45	0	2.39073
35.0569	3.5	0	-26.3133
35.0569	3.55	0	40.3916
35.0569	3.6	0	14.6418
35.0569	3.65	0	17.218
35.0569	3.7	0	8.67628
35.0569	3.75	0	-46.1823
35.0569	3.8	0	-22.3419
35.0569	3.85	0	24.9303
35.0569	3.9	0	58.9608
35.0569	3.95	0	-40.8914
35.0569	4	0	-35.9534
35.0569	4.05	0	66.5419
35.0569	4.1	0	55.7255
35.0569	4.15	0	60.7999
35.0569	4.2	0	-85.0633
35.0569	4.25	0	-12.7927
35.0569	4.3	0	48.1101
35.0569	4.35	0	55.9705
35.0569	4.4	0	15.0025
35.0569	4.45	0	-35.1343
35.0569	4.5	0	94.1803
35.0569	4.55	0	5.04568
35.0569	4.6	0	-22.8091
35.0569	4.65	0	-82.6308
35.0569	4.7	0	-58.7296
35.0569	4.75	0	108.823
35.0569	4.8	0	51.7865
35.0569	4.85	0	-35.2431
35.0569	4.9	0	66.6753
35.0569	4.95	0	67.7499
35.0569	5	0	-16.3512
35.0569	5.05	0	63.8413
35.0569	5.1	0	-12.4648
35.0569	5.15	0	-72.7059
35.0569	5.2	0	53.6367
35.0569	5.25	0	106.778
35.0569	5.3	0	-10.6928
35.0569	5.35	0	8.16157
35.0569	5.4	0	-89.3035
35.0569	5.45	0	-24.2551
35.0569	5.5	0	10.4875
35.0569	5.55	0	6.379
35.0569	5.6	0	45.6571
35.0569	5.65	0	-29.2794
35.0569	5.7	0	24.3281
35.0569	5.75	0	27.9799
35.0569	5.8	0	-33.6486
35.0569	5.85	0	99.5225
35.0569	5.9	0	32.626
35.0569	5.95	0	74.7992
35.0569	6	0	12.4851
35.0569	6.05	0	-27.4013
35.0569	6.1	0	-86.5671
35.0569	6.15	0	-34.9521
35.0569	6.2	0	4.87553
35.0569	6.25	0	-48.3357
35.0569	6.3	0	51.9376
35.0569	6.35	0	2.43728
35.0569	6.4	0	5.41826
35.0569	6.45	0	-135.206
35.0569	6.5	0	3.72908
35.0569	6.55	0	-107.819
35.0569	6.6	0	-20.9956
35.0569	6.65	0	-52.9847
35.0569	6.7	0	47.0319
35.0569	6.75	0	54.375
35.0569	6.8	0	-129.437
35.0569	6.85	0	-104.47
35.0569	6.9	0	-20.4736
35.0569	6.95	0	-7.17045
35.0569	7	0	-85.921
35.0569	7.05	0	1.16774
35.0569	7.1	0	-64.4743
35.0569	7.15	0	-29.4798
35.0569	7.2	0	-71.2537
35.0569	7.25	0	-31.0937
35.0569	7.3	0	-0.0842304
35.5398	7.35	0	27.6029
39.3246	7.4	0	11.5412
43.1094	7.45	0	-3.63613
46.8942	7.5	0	-32.693
50.679	7.55	0	65.5361
54.4638	7.6	0	-32.2813
58.2487	7.65	0	-55.5554
62.0335	7.7	0	76.4471
65.8183	7.75	0	-23.0703
69.6031	7.8	0	17.5271
73.3879	7.85	0	40.0073
77.1727	7.9	0	-41.3634
80.9575	7.95	0	-10.3368
81.6408	8	0	12.3639
81.6408	8.05	0	-34.8969
81.6408	8.1	0	77.3255
81.6408	8.15	0	6.83839
81.6408	8.2	0	-14.3213
81.6408	8.25	0	63.7337
81.6408	8.3	0	-136.451
81.6408	8.35	0	102.883
81.6408	8.4	0	-34.3999
81.6408	8.45	0	-134.236
81.6408	8.5	0	-77.6525
81.6408	8.55	0	64.0915
81.6408	8.6	0	61.3079
81.6408	8.65	0	-18.3172
81.6408	8.7	0	133.238
81.6408	8.75	0	-91.3958
81.6408	8.8	0	-17.9938
81.6408	8.85	0	83.6083
81.6408	8.9	0	29.1789
81.6408	8.95	0	-31.6303
81.6408	9	0	129.693
81.6408	9.05	0	29.9494
81.6408	9.1	0	-192.829
81.6408	9.15	0	-121.239
81.6408	9.2	0	103.212
81.6408	9.25	0	-27.4154
81.6408	9.3	0	40.8246
81.931	9.35	0	24.4969
84.891	9.4	0	-78.4624
87.8509	9.45	0	8.14697
90.8109	9.5	0	39.9664
93.7709	9.55	0	-47.3752
96.7309	9.6	0	59.2019
99.6909	9.65	0	-57.5618
102.651	9.7	0	53.3448
105.611	9.75	0	-5.43757
108.571	9.8	0	-30.4599
111.531	9.85	0	25.0087
114.491	9.9	0	-13.5655
117.451	9.95	0	-76.2612
120.411	10	0	-32.612
120.992	10.05	0	-51.6319
120.992	10.1	0	23.5133
120.992	10.15	0	14.5642
120.992	10.2	0	100.176
120.992	10.25	0	-45.1828
120.992	10.3	0	21.2207
120.992	10.35	0	126.693
120.992	10.4	0	49.8445
120.992	10.45	0	-10.7232
120.992	10.5	0	47.032
120.992	10.55	0	98.2598
120.992	10.6	0	53.6833
120.992	10.65	0	49.6053
120.992	10.7	0	12.0094
120.992	10.75	0	-42.9117
120.992	10.8	0	149.068
120.992	10.85	0	-42.6501
120.992	10.9	0	5.93935
120.992	10.95	0	50.6533
120.992	11	0	-2.6853
120.992	11.05	0	16.3365
120.992	11.1	0	-4.79097
120.992	11.15	0	8.68103
120.992	11.2	0	44.1367
120.992	11.25	0	-11.6251
120.992	11.3	0	-38.9249
120.992	11.35	0	-54.7485
120.992	11.4	0	134.034
120.992	11.45	0	-64.5587
120.992	11.5	0	-36.6934
120.992	11.55	0	16.7661
120.992	11.6	0	-22.2037
120.992	11.65	0	117.155
120.992	11.7	0	-26.5565
120.992	11.75	0	99.9595
120.992	11.8	0	65.6508
120.992	11.85	0	0.919002
120.992	11.9	0	-25.8817
120.992	11.95	0	56.0172
120.992	12	0	-10.9884
120.992	12.05	0	4.20695
120.992	12.1	0	-39.5624
120.992	12.15	0	0.406394
120.992	12.2	0	-11.8186
120.992	12.25	0	105.15
120.992	12.3	0	5.36555
120.992	12.35	0	-41.3837
120.992	12.4	0	-70.5837
120.992	12.45	0	3.09242
120.992	12.5	0	-55.7161
120.992	12.55	0	-14.7858
120.992	12.6	0	-45.3631
120.992	12.65	0	-40.3603
120.992	12.7	0	-25.1908
120.992	12.75	0	-60.4568
123.258	12.8	0	51.4998
127.712	12.85	0	-41.5845
132.166	12.9	0	11.8322
136.62	12.95	0	-73.7427
141.074	13	0	6.29527
145.528	13.05	0	54.0659
149.982	13.1	0	56.1531
154.436	13.15	0	-63.41
158.89	13.2	0	29.5765
163.344	13.25	0	-39.4056
167.798	13.3	0	-4.09779
172.252	13.35	0	5.55736
176.706	13.4	0	93.2469
181.16	13.45	0	-35.4779
185.614	13.5	0	139.723
190.068	13.55	0	-143.114
194.522	13.6	0	-40.6205
198.976	13.65	0	-77.4016
202.581	13.7	0	-1.69158
202.581	13.75	0	-64.4604
202.581	13.8	0	-55.3278
202.581	13.85	0	-8.4127
202.581	13.9	0	-77.8496
202.581	13.95	0	18.3683
202.581	14	0	21.1984
202.581	14.05	0	141.628
202.581	14.1	0	-73.7254
202.581	14.15	0	1.99768
202.581	14.2	0	40.7763
202.581	14.25	0	-4.43061
202.581	14.3	0	67.0459
202.581	14.35	0	21.1373
202.581	14.4	0	-66.6667
202.581	14.45	0	82.5557
202.581	14.5	0	98.4717
202.581	14.55	0	51.6844
202.581	14.6	0	-119.305
202.581	14.65	0	17.2514
202.581	14.7	0	44.68
202.581	14.75	0	-62.3877
202.581	14.8	0	5.14496
202.581	14.85	0	2.89243
202.581	14.9	0	-48.296
202.581	14.95	0	-48.1893
202.581	15	0	-60.6307
202.581	15.05	0	-107.7
202.581	15.1	0	-87.4018
202.581	15.15	0	17.4649
202.581	15.2	0	11.985
202.581	15.25	0	-27.407
202.581	15.3	0	73.4266
202.581	15.35	0	61.8146
202.581	15.4	0	-3.35662
202.581	15.45	0	59.4302
202.581	15.5	0	-16.9794
202.581	15.55	0	2.77482
202.581	15.6	0	-41.6638
202.581	15.65	0	45.1572
202.581	15.7	0	-4.69078
202.581	15.75	0	54.4359
202.581	15.8	0	-17.7714
202.581	15.85	0	-34.7942
202.581	15.9	0	45.1599
202.581	15.95	0	60.7267
202.581	16	0	28.1886
202.581	16.05	0	90.1753
202.581	16.1	0	-47.0342
202.581	16.15	0	-124.945
202.581	16.2	0	20.4739
202.581	16.25	0	-27.251
202.581	16.3	0	-88.8618
202.581	16.35	0	-64.2461
202.581	16.4	0	23.1795
202.581	16.45	0	-12.4453
202.581	16.5	0	23.6281
202.581	16.55	0	0.17833
202.581	16.6	0	-28.7102
202.581	16.65	0	-30.9366
202.581	16.7	0	87.9445
202.581	16.75	0	-71.8857
202.581	16.8	0	112.983
202.581	16.85	0	3.95937
202.581	16.9	0	3.45798
202.581	16.95	0	16.7233
202.581	17	0	-2.78903
202.581	17.05	0	38.5336
202.907	17.1	0	-123.462
209.127	17.15	0	-79.1551
215.347	17.2	0	23.6926
221.567	17.25	0	83.2017
227.786	17.3	0	-37.8391
234.006	17.35	0	54.7958
240.226	17.4	0	51.0089
246.446	17.45	0	5.05133
252.666	17.5	0	-6.76417
258.885	17.55	0	-22.296
265.105	17.6	0	-135.768
271.325	17.65	0	-8.03172
277.102	17.7	0	14.0952
277.102	17.75	0	161.08
277.102	17.8	0	22.2592
277.102	17.85	0	50.5088
277.102	17.9	0	118.487
277.102	17.95	0	10.7563
277.102	18	0	114.676
277.102	18.05	0	-17.5474
277.102	18.1	0	0.343282
277.102	18.15	0	62.5506
277.102	18.2	0	13.8822
277.102	18.25	0	-45.3597
277.102	18.3	0	40.7949
277.102	18.35	0	5.92377
277.102	18.4	0	61.2784
277.102	18.45	0	31.9834
277.102	18.5	0	5.23382
277.102	18.55	0	25.5659
277.102	18.6	0	-114.402
277.102	18.65	0	-30.0626
277.102	18.7	0	113.625
277.102	18.75	0	71.0673
277.102	18.8	0	-105.211
277.102	18.85	0	21.8088
277.102	18.9	0	38.0422
277.102	18.95	0	13.1406
277.102	19	0	-101.875
277.102	19.05	0	-84.1622
277.102	19.1	0	-43.8952
277.102	19.15	0	-143.647
277.102	19.2	0	71.9572
277.102	19.25	0	-68.1996
277.102	19.3	0	14.0504
277.102	19.35	0	54.1114
277.102	19.4	0	36.8052
277.102	19.45	0	-34.0803
277.102	19.5	0	54.3887
277.102	19.55	0	-57.8902
277.102	19.6	0	51.5995
277.102	19.65	0	0.217335
277.102	19.7	0	-65.5379
277.102	19.75	0	18.6548
277.102	19.8	0	-64.6856
277.102	19.85	0	-0.402877
277.102	19.9	0	44.1259
277.102	19.95	0	-103.283
277.102	20	0	-7.04355
277.102	20.05	0	-45.2777
277.102	20.1	0	94.5619
277.102	20.15	0	42.8351
277.102	20.2	0	60.4042
277.102	20.25	0	-32.4267
277.102	20.3	0	4.42426
277.102	20.35	0	-45.9827
277.102	20.4	0	25.7717
277.102	20.45	0	-23.4187
277.102	20.5	0	-41.0627
277.102	20.55	0	-50.8436
277.102	20.6	0	-97.6069
277.102	20.65	0	-45.0095
277.102	20.7	0	18.3027
277.102	20.75	0	-53.6258
277.102	20.8	0	-10.8642
277.102	20.85	0	-62.6705
277.102	20.9	0	38.7556
277.102	20.95	0	-37.3497
277.102	21	0	-14.6188
277.102	21.05	0	90.2444
277.102	21.1	0	34.2875
277.102	21.15	0	78.2622
277.102	21.2	0	36.7473
277.102	21.25	0	-39.5897
277.102	21.3	0	30.074
277.102	21.35	0	89.0546
277.102	21.4	0	0.430948
277.102	21.45	0	45.4439
277.102	21.5	0	90.5981
277.102	21.55	0	1.69351
277.102	21.6	0	12.596
277.102	21.65	0	58.698
277.102	21.7	0	11.9908
277.102	21.75	0	47.304
277.102	21.8	0	96.3221
277.102	21.85	0	13.6971
277.102	21.9	0	11.3888
277.102	21.95	0	11.4256
277.102	22	0	-5.72798
277.102	22.05	0	-13.4364
277.102	22.1	0	-16.6286
277.102	22.15	0	-10.9012
277.102	22.2	0	-29.3309
277.102	22.25	0	-10.2295
277.102	22.3	0	9.04287
277.102	22.35	0	-39.5382
277.102	22.4	0	0.653649
277.102	22.45	0	-163.739
277.102	22.5	0	140.729
277.102	22.55	0	-51.7244
277.102	22.6	0	-45.3181
277.102	22.65	0	-16.1941
277.102	22.7	0	92.834
277.102	22.75	0	-155.381
277.102	22.8	0	-66.1139
277.102	22.85	0	-54.9373
277.102	22.9	0	-91.805
277.102	22.95	0	-70.7801
277.102	23	0	7.86241
277.102	23.05	0	-23.1678
277.102	23.1	0	-23.2064
277.102	23.15	0	-1.21852
277.102	23.2	0	-58.569
277.102	23.25	0	-17.6199
277.102	23.3	0	-75.6154
277.102	23.35	0	-40.8606
277.102	23.4	0	32.0975
277.102	23.45	0	92.1016
277.102	23.5	0	-7.02708
277.102	23.55	0	12.1499
277.102	23.6	0	-2.63493
277.102	23.65	0	-37.583
277.102	23.7	0	-3.6393
277.102	23.75	0	57.8365
277.102	23.8	0	-62.2411
277.102	23.85	0	-20.4751
277.102	23.9	0	-37.7923
277.102	23.95	0	-65.1171
277.102	24	0	97.5748
277.102	24.05	0	-10.5946
277.102	24.1	0	31.9313
277.102	24.15	0	104.257
278.51	24.2	0	99.0895
281.825	24.25	0	118.547
285.14	24.3	0	-37.4139
288.456	24.35	0	94.5945
291.771	24.4	0	24.882
295.086	24.45	0	-20.0279
298.401	24.5	0	-16.6276
301.716	24.55	0	-124.428
305.031	24.6	0	119.672
308.346	24.65	40	95.2812
311.662	24.7	40	55.661
314.977	24.75	40	133.231
318.292	24.8	40	78.9263
320.712	24.85	40	88.2804
320.712	24.9	40	84.5479
320.712	24.95	40	49.0481
320.712	25	40	12.8592
320.712	25.05	40	53.9442
320.712	25.1	40	35.4843
320.712	25.15	40	38.1586
320.712	25.2	40	30.735
320.712	25.25	40	22.166
320.712	25.3	40	112.985
320.712	25.35	40	-15.3672
320.712	25.4	40	91.8939
320.712	25.45	40	56.8647
320.712	25.5	40	-33.4469
320.712	25.55	40	61.4655
320.712	25.6	40	-6.4834
320.712	25.65	40	60.5258
320.712	25.7	40	44.7411
320.712	25.75	40	-35.7973
320.712	25.8	40	64.9989
320.712	25.85	40	-20.6769
320.712	25.9	40	-13.6117
320.712	25.95	40	43.5228
320.712	26	40	123.705
320.712	26.05	40	57.6724
320.712	26.1	40	32.8772
320.712	26.15	40	77.1394
320.712	26.2	40	-16.1892
320.712	26.25	40	114.441
320.712	26.3	40	93.0337
320.712	26.35	40	25.0217
320.712	26.4	40	71.5383
320.712	26.45	40	19.6121
320.712	26.5	40	11.1577
320.712	26.55	40	47.9545
320.712	26.6	40	-15.7744
320.712	26.65	40	-2.98265
320.712	26.7	40	-6.14648
320.712	26.75	40	65.0005
320.712	26.8	40	13.9179
320.712	26.85	40	44.4153
320.712	26.9	40	20.5629
320.712	26.95	40	74.2868
320.712	27	40	103.02
320.712	27.05	40	29.6927
320.712	27.1	40	72.5146
320.712	27.15	40	-10.3704
320.712	27.2	40	45.6845
320.712	27.25	40	41.7831
320.712	27.3	40	108.579
320.712	27.35	40	188.322
320.712	27.4	40	178.387
320.712	27.45	40	49.2734
320.712	27.5	40	3.4937
320.712	27.55	40	46.676
320.712	27.6	40	-5.07628
320.712	27.65	40	48.9865
320.712	27.7	40	36.6582
320.712	27.75	40	43.3079
320.712	27.8	40	104.733
320.712	27.85	40	55.4604
320.712	27.9	40	150.39
320.712	27.95	40	35.6145
320.712	28	40	8.06798
320.712	28.05	40	76.892
320.712	28.1	40	-42.0014
320.712	28.15	40	41.3683
320.712	28.2	40	53.9406
320.712	28.25	40	48.1103
320.712	28.3	40	23.3148
320.712	28.35	40	106.121
320.712	28.4	40	20.3546
320.712	28.45	40	27.3616
320.712	28.5	40	52.3638
320.712	28.55	40	118.339
320.712	28.6	40	37.6882
320.712	28.65	40	177.367
320.712	28.7	40	-56.838
320.712	28.75	40	-60.9896
320.712	28.8	40	36.2514
320.712	28.85	40	-43.5754
320.712	28.9	40	11.8625
320.712	28.95	40	33.4625
320.712	29	40	7.80125
320.712	29.05	40	52.8118
320.712	29.1	40	70.3592
320.712	29.15	40	75.9036
320.712	29.2	40	44.5163
320.712	29.25	40	-10.8947
320.712	29.3	40	21.8454
320.712	29.35	40	-75.7178
320.712	29.4	40	20.8067
320.712	29.45	40	69.765
320.712	29.5	40	159.046
320.712	29.55	40	44.7078
320.712	29.6	40	20.4384
320.712	29.65	40	4.67072
320.712	29.7	40	-72.5231
320.712	29.75	40	56.1308
320.712	29.8	40	98.5632
320.712	29.85	40	-60.981
320.712	29.9	40	31.3577
320.712	29.95	40	33.6141
320.712	30	40	-66.2004
320.712	30.05	40	57.0724
320.712	30.1	40	14.006
320.712	30.15	40	-45.6295
320.712	30.2	40	2.16135
320.712	30.25	40	-74.8054
320.712	30.3	40	153.517
320.712	30.35	40	71.9986
320.712	30.4	40	-38.0869
320.712	30.45	40	17.9523
320.712	30.5	40	36.7337
320.712	30.55	40	122.639
320.712	30.6	40	12.1997
320.712	30.65	40	70.6927
320.712	30.7	40	126.494
320.712	30.75	40	18.6884
320.712	30.8	40	31.4272
320.712	30.85	40	96.06
320.712	30.9	40	16.1627
320.712	30.95	40	23.4008
320.712	31	40	83.5894
320.712	31.05	40	1.09526
320.712	31.1	40	-9.67486
320.712	31.15	40	28.218
320.712	31.2	40	62.4339
320.712	31.25	40	-36.0802
320.712	31.3	40	27.9327
320.712	31.35	40	-1.08473
320.712	31.4	40	62.2303
320.712	31.45	40	-10.1902
320.712	31.5	40	-24.5453
320.712	31.55	40	-57.581
320.712	31.6	40	-5.03251
320.712	31.65	40	45.5904
320.712	31.7	40	64.5442
320.712	31.75	40	-25.743
320.712	31.8	40	62.3555
320.712	31.85	40	50.258
320.712	31.9	40	78.1267
320.712	31.95	40	106.723
320.712	32	40	-6.67154
320.712	32.05	40	78.2158
320.712	32.1	40	87.5103
320.712	32.15	40	3.04661
320.712	32.2	40	29.6993
320.712	32.25	40	52.2512
320.712	32.3	40	37.6688
320.712	32.35	40	55.1808
320.712	32.4	40	-92.9934
320.712	32.45	40	14.4604
320.712	32.5	40	57.8752
320.712	32.55	40	46.0922
320.712	32.6	40	77.3657
320.712	32.65	40	51.9996
320.712	32.7	40	-38.881
320.712	32.75	40	134.467
320.712	32.8	40	-53.9723
320.712	32.85	40	142.441
320.712	32.9	40	129.475
320.712	32.95	40	155.811
320.712	33	40	-4.09909
320.712	33.05	40	56.0279
320.712	33.1	40	-28.4161
320.712	33.15	40	-5.0488
320.712	33.2	40	85.7697
320.712	33.25	40	54.6882
320.712	33.3	40	50.3538
320.712	33.35	40	94.1969
320.712	33.4	40	28.867
320.712	33.45	40	58.655
320.712	33.5	40	51.7105
320.712	33.55	40	-26.1063
320.712	33.6	40	22.1281
320.712	33.65	40	30.7805
320.712	33.7	40	52.936
320.712	33.75	40	30.5277
320.712	33.8	40	5.30495
320.712	33.85	40	109.758
320.712	33.9	40	48.7137
320.712	33.95	40	12.6659
320.712	34	40	-4.28481
320.712	34.05	40	53.6583
320.712	34.1	40	-42.5621
320.712	34.15	40	18.8652
320.712	34.2	40	32.9177
320.712	34.25	40	30.109
320.712	34.3	40	77.7491
320.712	34.35	40	74.932
320.712	34.4	40	53.5295
320.712	34.45	40	32.5573
320.712	34.5	40	21.0568
320.712	34.55	40	18.995
320.712	34.6	40	-24.4923
320.712	34.65	40	55.6684
320.712	34.7	40	89.3302
320.712	34.75	40	71.862
320.712	34.8	40	-70.3202
320.712	34.85	40	32.0547
320.712	34.9	40	51.552
320.712	34.95	40	64.3856
320.712	35	40	61.9031
320.712	35.05	40	34.0879
320.712	35.1	40	95.4133
320.712	35.15	40	-52.1785
320.712	35.2	40	-37.2304
320.712	35.25	40	8.12044
322.351	35.3	40	-16.3244
325.302	35.35	40	76.4813
328.252	35.4	40	4.86513
331.202	35.45	40	107.097
334.152	35.5	40	86.4067
337.102	35.55	40	-32.5927
340.052	35.6	40	53.0669
343.002	35.65	40	80.7563
345.952	35.7	40	-69.4019
348.902	35.75	40	5.83555
351.852	35.8	40	74.6097
354.802	35.85	40	110.647
357.752	35.9	40	33.319
358.611	35.95	40	114.179
358.611	36	40	66.3531
358.611	36.05	40	93.8007
358.611	36.1	40	147.078
358.611	36.15	40	-65.5758
358.611	36.2	40	13.9895
358.611	36.25	40	122.572
358.611	36.3	40	147.368
358.611	36.35	40	70.0725
358.611	36.4	40	-29.2209
358.611	36.45	40	21.2372
358.611	36.5	40	62.2618
358.611	36.55	40	34.0127
358.611	36.6	40	76.7656
358.611	36.65	40	-20.0811
358.611	36.7	40	98.5745
358.611	36.75	40	72.0871
358.611	36.8	40	-77.7657
358.611	36.85	40	40.9847
358.611	36.9	40	-2.3354
358.611	36.95	40	93.8203
358.611	37	40	126.218
358.611	37.05	40	81.0132
358.611	37.1	40	9.94075
358.611	37.15	40	22.7485
358.611	37.2	40	4.73005
358.611	37.25	40	-3.9203
358.611	37.3	40	20.1078
358.611	37.35	40	65.1566
358.611	37.4	40	-30.5834
358.611	37.45	40	129.014
358.611	37.5	40	28.6366
358.611	37.55	40	73.5509
358.611	37.6	40	39.8628
358.611	37.65	40	-16.9748
358.611	37.7	40	56.1745
358.611	37.75	40	-37.4016
358.611	37.8	40	-28.3353
358.611	37.85	40	97.2457
358.611	37.9	40	-81.1371
358.611	37.95	40	-69.5081
358.611	38	40	144.819
358.611	38.05	40	78.0131
358.611	38.1	40	30.4776
358.611	38.15	40	14.2378
358.611	38.2	40	-33.69
358.611	38.25	40	5.54215
358.611	38.3	40	93.2539
358.611	38.35	40	30.0624
358.611	38.4	40	1.32315
358.611	38.45	40	2.63439
358.611	38.5	40	-18.1323
358.611	38.55	40	47.9099
358.611	38.6	40	13.7452
358.611	38.65	40	115.532
358.611	38.7	40	-12.0694
358.611	38.75	40	114.822
361.915	38.8	40	98.8709
365.504	38.85	40	-1.7395
369.092	38.9	40	116.375
372.681	38.95	40	47.3583
376.269	39	40	-57.0387
379.858	39.05	40	81.2446
383.447	39.1	40	-66.5115
387.035	39.15	40	-34.0187
390.624	39.2	40	25.8889
394.213	39.25	40	10.1626
397.801	39.3	40	22.4808
401.306	39.35	40	118.603
401.306	39.4	40	-10.9186
401.306	39.45	40	-45.7009
401.306	39.5	40	38.4274
401.306	39.55	40	-87.5639
401.306	39.6	40	70.4977
401.306	39.65	40	16.9551
401.306	39.7	40	-100.106
401.306	39.75	40	-9.24437
401.306	39.8	40	73.105
401.306	39.85	40	-29.4539
401.306	39.9	40	-20.7763
401.306	39.95	40	-19.8878
401.306	40	40	49.0109
401.306	40.05	40	75.4074
401.306	40.1	40	75.9104
401.306	40.15	40	77.6395
401.306	40.2	40	39.8507
401.306	40.25	40	4.97391
401.306	40.3	40	15.2218
401.306	40.35	40	-87.2814
401.306	40.4	40	53.9749
401.306	40.45	40	-137.453
401.306	40.5	40	87.6685
401.306	40.55	40	41.7048
401.306	40.6	40	-8.45762
401.306	40.65	40	0.577946
401.306	40.7	40	-47.0343
401.306	40.75	40	145.28
401.306	40.8	40	-17.2076
401.306	40.85	40	-48.8506
401.306	40.9	40	-27.6104
401.306	40.95	40	112.073
401.306	41	40	107.435
401.306	41.05	40	-2.25899
401.306	41.1	40	9.57284
401.306	41.15	40	0.694632
401.306	41.2	40	21.4863
401.306	41.25	40	123.668
401.306	41.3	40	27.0877
401.306	41.35	40	-11.3953
401.306	41.4	40	93.4322
401.306	41.45	40	3.26801
401.306	41.5	40	98.3969
401.306	41.55	40	78.4335
401.306	41.6	40	-61.4092
401.306	41.65	40	104.592
401.306	41.7	40	40.231
401.306	41.75	40	50.8588
401.306	41.8	40	5.07859
401.306	41.85	40	-22.8405
401.306	41.9	40	10.1492
401.306	41.95	40	69.2848
401.306	42	40	86.31
401.306	42.05	40	65.8719
401.306	42.1	40	-43.2336
401.306	42.15	40	-22.4782
401.306	42.2	40	-16.5168
401.306	42.25	40	39.012
401.306	42.3	40	130.408
401.306	42.35	40	104.368
401.306	42.4	40	22.6434
401.306	42.45	40	90.0387
401.306	42.5	40	26.8011
401.306	42.55	40	66.7516
401.306	42.6	40	104.161
401.306	42.65	40	101.951
401.306	42.7	40	-66.6041
401.306	42.75	40	149.011
401.306	42.8	40	-21.7581
401.306	42.85	40	-1.98853
401.306	42.9	40	41.7829
401.306	42.95	40	42.0757
401.306	43	40	120.584
401.306	43.05	40	145.464
401.306	43.1	40	-77.1988
401.306	43.15	40	181.757
401.306	43.2	40	79.173
401.306	43.25	40	42.5488
401.306	43.3	40	84.3207
401.306	43.35	40	19.099
401.306	43.4	40	76.6373
401.306	43.45	40	-12.233
401.306	43.5	40	1.18385
401.306	43.55	40	-50.9863
401.306	43.6	40	-8.80214
401.306	43.65	40	144.087
401.306	43.7	40	160.145
401.306	43.75	40	-29.8363
401.306	43.8	40	74.3219
401.306	43.85	40	63.3733
401.306	43.9	40	58.8695
401.306	43.95	40	47.1184
401.306	44	40	25.4068
401.306	44.05	40	33.338
401.306	44.1	40	27.0302
401.306	44.15	40	7.65847
401.306	44.2	40	51.2429
401.306	44.25	40	98.9623
401.306	44.3	40	71.8679
401.306	44.35	40	60.3162
401.306	44.4	40	42.1832
401.306	44.45	40	-40.6771
401.306	44.5	40	93.4585
401.306	44.55	40	1.99438
401.306	44.6	40	87.7604
401.306	44.65	40	-10.0581
401.306	44.7	40	25.9703
401.306	44.75	40	88.8456
401.306	44.8	40	97.9908
401.306	44.85	40	-24.2986
401.306	44.9	40	-7.21532
401.306	44.95	40	49.0274
401.306	45	40	96.7272
401.306	45.05	40	131.715
401.306	45.1	40	32.1805
401.306	45.15	40	-24.4741
401.306	45.2	40	-52.9794
401.306	45.25	40	17.4876
401.306	45.3	40	-95.549
401.306	45.35	40	175.162
401.306	45.4	40	106.745
401.306	45.45	40	15.2654
401.306	45.5	40	102.012
401.306	45.55	40	-5.05669
401.306	45.6	40	52.9612
401.306	45.65	40	-44.1813
401.306	45.7	40	90.7031
401.306	45.75	40	83.8501
401.306	45.8	40	-20.2905
401.306	45.85	40	-0.720464
401.306	45.9	40	109.838
401.306	45.95	40	91.9221
401.306	46	40	68.0657
401.306	46.05	40	86.6912
401.306	46.1	40	36.1573
401.306	46.15	40	72.2144
401.306	46.2	40	-11.223
401.306	46.25	40	7.70073
401.306	46.3	40	27.6913
401.306	46.35	40	54.7165
401.306	46.4	40	86.8377
401.306	46.45	40	-24.0467
401.306	46.5	40	49.798
401.306	46.55	40	-4.24816
401.306	46.6	40	28.4806
401.306	46.65	40	101.903
401.306	46.7	40	58.8379
401.306	46.75	40	47.0092
401.306	46.8	40	54.3863
401.306	46.85	40	53.7268
401.306	46.9	40	95.9123
401.306	46.95	40	29.9201
401.306	47	40	-45.7046
401.306	47.05	40	20.4871
401.306	47.1	40	-42.5457
401.306	47.15	40	-83.1809
401.306	47.2	40	18.377
401.306	47.25	40	15.5809
401.306	47.3	40	95.3322
401.306	47.35	40	-28.033
401.306	47.4	40	-59.8557
401.306	47.45	40	40.3364
401.306	47.5	40	10.7023
401.306	47.55	40	34.6741
401.306	47.6	40	42.5366
401.306	47.65	40	32.3111
401.306	47.7	40	26.3944
401.306	47.75	40	105.356
401.306	47.8	40	35.6666
401.306	47.85	40	-13.5927
401.306	47.9	40	-100.29
401.306	47.95	40	-75.3384
401.306	48	40	-47.7785
401.306	48.05	40	-4.75176
401.306	48.1	40	-93.8462
401.306	48.15	40	-15.6911
401.306	48.2	40	-14.1314
401.306	48.25	40	0.34733
401.306	48.3	40	-41.4852
401.306	48.35	40	15.9348
401.306	48.4	40	-16.1104
401.306	48.45	40	-50.8958
401.306	48.5	40	9.97887
401.306	48.55	40	-35.474
401.306	48.6	40	58.318
401.306	48.65	40	-18.4924
401.306	48.7	40	39.0191
401.306	48.75	40	79.7441
401.306	48.8	40	-8.51628
401.306	48.85	40	-34.9873
401.306	48.9	40	27.1346
401.306	48.95	40	93.7313
401.306	49	40	112.584
401.306	49.05	40	66.2442
401.306	49.1	40	-78.6896
401.306	49.15	40	101.324
401.306	49.2	40	12.2837
401.306	49.25	40	-63.4475
401.306	49.3	40	3.9155
401.306	49.35	40	7.93213
401.306	49.4	40	2.9672
401.306	49.45	40	2.55184
401.306	49.5	40	69.6335
401.306	49.55	40	78.6075
401.306	49.6	40	101.16
401.306	49.65	40	14.3756
401.306	49.7	40	-45.8201
401.306	49.75	40	23.1112
401.306	49.8	40	94.3672
401.306	49.85	40	23.1952
401.306	49.9	40	41.1653
401.306	49.95	40	54.3825
401.306	50	40	37.4174
401.306	50.05	40	58.3408
401.306	50.1	40	65.1294
401.306	50.15	40	89.7265
401.306	50.2	40	92.4267
401.306	50.25	40	-73.2806
401.306	50.3	40	-15.4954
401.306	50.35	40	40.9515
401.306	50.4	40	24.6854
401.306	50.45	40	66.4973
401.306	50.5	40	71.5458
401.306	50.55	40	69.9822
401.306	50.6	40	133.378
401.306	50.65	40	101.796
401.306	50.7	40	72.2468
401.306	50.75	40	-98.7769
401.306	50.8	40	16.6171
401.306	50.85	40	22.1478
401.306	50.9	40	110.246
401.306	50.95	40	74.7178
401.306	51	40	-28.2053
401.306	51.05	40	64.1804
401.306	51.1	40	5.55125
401.306	51.15	40	33.374
401.306	51.2	40	-41.9124
401.306	51.25	40	103.106
401.306	51.3	40	-22.1639
401.306	51.35	40	9.95108
401.306	51.4	40	-52.4472
401.306	51.45	40	-20.5314
401.306	51.5	40	-9.94162
401.306	51.55	40	0.872613
401.306	51.6	40	85.4812
401.306	51.65	40	15.4226
401.306	51.7	40	115.795
401.306	51.75	40	7.47842
401.306	51.8	40	138.681
401.306	51.85	40	-38.5462
401.306	51.9	40	43.1257
401.306	51.95	40	150.748
401.306	52	40	149.148
402.471	52.05	40	88.1636
405.576	52.1	40	40.3181
408.681	52.15	40	99.7768
411.786	52.2	40	37.2042
414.892	52.25	40	-59.5308
417.997	52.3	40	7.465
421.102	52.35	40	109.486
424.207	52.4	40	-91.5142
427.312	52.45	40	23.2681
430.418	52.5	40	1.39298
433.523	52.55	40	25.0483
436.628	52.6	40	18.5684
439.733	52.65	40	-9.26803
440.445	52.7	40	76.1559
440.445	52.75	40	51.134
440.445	52.8	40	-7.80921
440.445	52.85	40	41.8341
440.445	52.9	40	2.51364
440.445	52.95	40	56.8441
440.445	53	40	28.4179
440.445	53.05	40	9.6675
440.445	53.1	40	-86.5107
440.445	53.15	40	66.9943
440.445	53.2	40	31.0293
440.445	53.25	40	130.095
440.445	53.3	40	27.9897
440.445	53.35	40	58.88
440.445	53.4	40	33.6267
440.445	53.45	40	2.03996
440.445	53.5	40	-14.3175
440.445	53.55	40	64.974
440.445	53.6	40	-13.5424
440.445	53.65	40	-33.2318
440.445	53.7	40	155.597
440.445	53.75	40	97.4403
440.445	53.8	40	8.23809
440.445	53.85	40	55.5342
440.445	53.9	40	-22.3813
440.445	53.95	40	-41.9563
440.445	54	40	-28.7921
440.445	54.05	40	33.7794
440.445	54.1	40	7.46741
440.445	54.15	40	-13.2643
440.445	54.2	40	57.5597
440.445	54.25	40	6.96355
440.445	54.3	40	70.3136
440.445	54.35	40	55.7335
440.445	54.4	40	-11.0637
440.445	54.45	40	21.3417
440.445	54.5	40	64.6815
440.445	54.55	40	54.2346
440.445	54.6	40	-7.12147
440.445	54.65	40	-55.7412
440.445	54.7	40	90.8214
440.445	54.75	40	46.7833
440.445	54.8	40	11.173
440.445	54.85	40	34.5337
440.445	54.9	40	-2.34956
440.445	54.95	40	74.2555
440.445	55	40	88.0777
440.445	55.05	40	12.3019
440.445	55.1	40	62.1032
440.445	55.15	40	40.7439
440.445	55.2	40	33.1459
440.445	55.25	40	4.25619
440.445	55.3	40	-18.584
440.445	55.35	40	-9.15792
440.445	55.4	40	56.1314
440.445	55.45	40	69.6431
440.445	55.5	40	70.0225
440.445	55.55	40	73.3338
440.445	55.6	40	7.25852
440.445	55.65	40	22.6141
440.445	55.7	40	-26.347
440.445	55.75	40	-23.7612
440.445	55.8	40	5.58119
440.445	55.85	40	-51.2711
440.445	55.9	40	72.4953
440.445	55.95	40	47.733
440.445	56	40	60.5658
440.445	56.05	40	30.2072
440.445	56.1	40	-29.8589
440.445	56.15	40	101.029
440.445	56.2	40	90.0036
440.445	56.25	40	61.149
440.445	56.3	40	55.1092
440.445	56.35	40	-51.2068
440.445	56.4	40	9.0313
440.445	56.45	40	75.9781
440.445	56.5	40	36.9229
440.445	56.55	40	26.1045
440.445	56.6	40	35.0478
440.445	56.65	40	194.381
440.445	56.7	40	1.70578
440.445	56.75	40	125.414
440.445	56.8	40	33.0407
440.445	56.85	40	50.1817
440.445	56.9	40	111.537
440.445	56.95	40	19.4448
440.445	57	40	43.428
440.445	57.05	40	35.1542
440.445	57.1	40	-100.891
440.445	57.15	40	52.5159
440.445	57.2	40	88.4221
440.445	57.25	40	0.769687
440.445	57.3	40	90.8381
440.445	57.35	40	-46.956
440.445	57.4	40	48.5305
440.445	57.45	40	73.6436
440.445	57.5	40	78.5517
440.445	57.55	40	24.2685
440.445	57.6	40	155.765
440.445	57.65	40	-45.8623
440.445	57.7	40	-1.80761
440.445	57.75	40	35.9198
440.445	57.8	40	-61.6217
440.445	57.85	40	32.0695
440.445	57.9	40	35.9024
440.445	57.95	40	28.2711
440.445	58	40	35.6861
440.445	58.05	40	58.4194
440.445	58.1	40	132.912
440.445	58.15	40	95.7385
440.445	58.2	40	-68.0264
440.445	58.25	40	-66.3018
440.445	58.3	40	25.8049
440.445	58.35	40	-49.5358
440.445	58.4	40	52.8607
440.445	58.45	40	24.3012
440.445	58.5	40	-0.148801
440.445	58.55	40	25.6848
440.445	58.6	40	103.104
440.445	58.65	40	84.652
440.445	58.7	40	28.4746
440.445	58.75	40	73.8425
440.445	58.8	40	46.4461
440.445	58.85	40	155.368
440.445	58.9	40	43.1932
440.445	58.95	40	136.725
440.445	59	40	-38.1459
440.445	59.05	40	45.1649
440.445	59.1	40	3.62201
440.445	59.15	40	187.846
440.445	59.2	40	-9.6153
440.445	59.25	40	101.074
440.445	59.3	40	28.4378
440.445	59.35	40	139.63
440.445	59.4	40	52.5097
440.445	59.45	40	75.8146
440.445	59.5	40	45.2839
440.46	59.55	40	118.06
440.485	59.6	40	61.408
440.51	59.65	40	40.8155
440.536	59.7	40	-7.10204
440.561	59.75	40	-32.6069
440.586	59.8	40	52.0954
440.611	59.85	40	62.47
440.637	59.9	40	108.328
440.662	59.95	40	62.4999
440.687	60	40	-44.4765
440.713	60.05	40	158.445
440.723	60.1	40	12.2078
440.723	60.15	40	47.4586
440.723	60.2	40	28.4425
440.723	60.25	40	55.5311
440.723	60.3	40	8.06104
440.723	60.35	40	-29.4246
440.723	60.4	40	101.363
440.723	60.45	40	120.574
440.723	60.5	40	-20.9193
440.723	60.55	40	18.8309
440.723	60.6	40	73.5164
440.723	60.65	40	-85.3235
440.723	60.7	40	193.603
440.723	60.75	40	-24.8404
440.723	60.8	40	63.6387
440.723	60.85	40	-29.5929
440.723	60.9	40	46.0289
440.723	60.95	40	94.7238
440.723	61	40	26.3329
440.723	61.05	40	227.421
440.723	61.1	40	19.5428
440.723	61.15	40	69.0501
440.723	61.2	40	102.222
440.723	61.25	40	21.7614
440.723	61.3	40	-89.3212
440.723	61.35	40	15.3764
440.723	61.4	40	-80.6549
440.723	61.45	40	13.302
440.723	61.5	40	-43.1659
440.723	61.55	40	-3.44918
440.723	61.6	40	-79.2337
440.723	61.65	40	97.0145
440.723	61.7	40	62.3248
440.723	61.75	40	46.0929
440.723	61.8	40	63.347
440.723	61.85	40	38.6941
440.723	61.9	40	93.6721
440.723	61.95	40	-46.7906
440.723	62	40	12.8084
440.723	62.05	40	-5.14818
440.723	62.1	40	-67.1823
440.723	62.15	40	-11.7063
440.723	62.2	40	48.0428
440.723	62.25	40	63.3142
440.723	62.3	40	145.572
440.723	62.35	40	-51.9686
440.723	62.4	40	133.007
440.723	62.45	40	4.63762
440.723	62.5	40	162.568
440.723	62.55	40	-0.686261
440.723	62.6	40	-16.1284
440.723	62.65	40	0.703264
440.723	62.7	40	14.3384
440.723	62.75	40	124.447
440.723	62.8	40	39.1717
440.723	62.85	40	38.2571
440.723	62.9	40	56.5079
440.723	62.95	40	-57.2398
440.723	63	40	29.5638
440.723	63.05	40	14.2154
440.723	63.1	40	74.5639
440.723	63.15	40	3.26732
440.723	63.2	40	31.8704
440.723	63.25	40	-82.5346
440.723	63.3	40	27.7554
440.723	63.35	40	56.6258
440.723	63.4	40	24.5294
440.723	63.45	40	20.945
440.723	63.5	40	85.0853
440.723	63.55	40	66.3203
440.723	63.6	40	-15.3274
440.723	63.65	40	-9.48418
440.723	63.7	40	-61.4154
440.723	63.75	40	-11.243
440.723	63.8	40	1.30039
440.723	63.85	40	39.9905
440.723	63.9	40	102.102
440.723	63.95	40	63.259
440.723	64	40	76.4761
440.723	64.05	40	119.964
440.723	64.1	40	-68.7651
440.723	64.15	40	164.984
440.723	64.2	40	21.8692
440.723	64.25	40	-26.8898
440.723	64.3	40	54.9015
440.723	64.35	40	-36.1891
440.723	64.4	40	71.1249
440.723	64.45	40	80.6615
440.723	64.5	40	86.9476
440.723	64.55	40	-101.622
440.723	64.6	40	78.9372
440.723	64.65	40	28.0246
440.723	64.7	40	50.2986
440.723	64.75	40	72.6746
440.723	64.8	40	64.2925
440.723	64.85	40	49.8975
440.723	64.9	40	81.706
443.563	64.95	40	59.8268
446.809	65	40	20.388
450.056	65.05	40	88.7821
453.303	65.1	40	64.8189
456.549	65.15	40	107.765
459.796	65.2	40	79.0903
463.042	65.25	40	32.6765
466.289	65.3	40	-40.2306
469.535	65.35	40	120.232
472.782	65.4	40	-66.5074
476.028	65.45	40	149.325
479.275	65.5	40	66.01
479.716	65.55	40	103.811
479.716	65.6	40	32.2307
479.716	65.65	40	37.0652
479.716	65.7	40	66.582
479.716	65.75	40	8.09062
479.716	65.8	40	2.24865
479.716	65.85	40	-14.6277
479.716	65.9	40	96.2845
479.716	65.95	40	55.988
479.716	66	40	102.232
479.716	66.05	40	44.7876
479.716	66.1	40	2.87715
479.716	66.15	40	121.364
479.716	66.2	40	20.4972
479.716	66.25	40	0.925453
479.716	66.3	40	69.8583
479.716	66.35	40	43.7602
479.716	66.4	40	21.0122
479.716	66.45	40	41.4248
479.716	66.5	40	19.1732
479.716	66.55	40	-23.777
479.716	66.6	40	114.811
479.716	66.65	40	79.7689
479.716	66.7	40	101.21
479.716	66.75	40	78.2132
479.716	66.8	40	-16.6423
479.716	66.85	40	21.7994
479.716	66.9	40	-14.1388
479.716	66.95	40	11.931
479.716	67	40	-24.083
479.716	67.05	40	-109.839
479.716	67.1	40	89.3534
479.716	67.15	40	-73.1276
479.716	67.2	40	65.0546
479.716	67.25	40	40.8265
479.716	67.3	40	-71.856
479.716	67.35	40	7.68564
479.716	67.4	40	45.5811
479.716	67.45	40	41.4682
479.716	67.5	40	129.918
479.716	67.55	40	21.531
479.716	67.6	40	4.38703
479.716	67.65	40	7.78078
479.716	67.7	40	-13.6401
479.716	67.75	40	64.7536
479.716	67.8	40	70.5393
479.716	67.85	40	73.298
479.716	67.9	40	36.4871
479.716	67.95	40	-56.2403
479.716	68	40	41.2227
479.716	68.05	40	12.9241
479.716	68.1	40	31.0795
479.716	68.15	40	81.8904
479.716	68.2	40	18.8951
479.716	68.25	40	3.59912
479.716	68.3	40	91.6296
479.716	68.35	40	-8.05895
479.716	68.4	40	100.925
479.716	68.45	40	34.6896
479.716	68.5	40	104.73
479.716	68.55	40	88.1602
479.716	68.6	40	-22.2278
479.716	68.65	40	76.1564
479.716	68.7	40	52.881
479.716	68.75	40	103.692
479.716	68.8	40	-41.8625
479.716	68.85	40	1.08708
479.716	68.9	40	-4.63945
479.716	68.95	40	19.8656
479.716	69	40	99.9575
479.716	69.05	40	111.777
479.716	69.1	40	-39.5737
479.716	69.15	40	106.52
479.716	69.2	40	-26.9028
479.716	69.25	40	50.0138
479.716	69.3	40	-25.4948
479.716	69.35	40	37.5077
479.716	69.4	40	-15.7104
479.716	69.45	40	129.774
479.716	69.5	40	17.4395
479.716	69.55	40	-1.22238
479.716	69.6	40	32.8344
479.716	69.65	40	93.8479
479.716	69.7	40	84.3744
479.716	69.75	40	36.8905
479.716	69.8	40	23.0724
479.716	69.85	40	-56.4296
479.716	69.9	40	77.2535
479.716	69.95	40	114.799
479.716	70	40	3.38071
479.716	70.05	40	113.824
479.716	70.1	40	165.91
479.716	70.15	40	138.338
479.716	70.2	40	-43.8965
479.716	70.25	40	15.809
479.716	70.3	40	-44.7853
479.716	70.35	40	38.736
479.716	70.4	40	111.883
479.716	70.45	40	70.4771
479.716	70.5	40	-64.1884
479.716	70.55	40	2.78256
479.716	70.6	40	49.4465
479.716	70.65	40	42.8488
479.716	70.7	40	-47.0863
479.716	70.75	40	-12.778
479.716	70.8	40	102.151
479.716	70.85	40	110.563
479.716	70.9	40	75.1674
479.716	70.95	40	102.245
479.716	71	40	-1.79258
479.716	71.05	40	52.5951
479.716	71.1	40	64.0273
479.716	71.15	40	0.72486
479.716	71.2	40	-4.3374
479.716	71.25	40	34.1392
479.716	71.3	40	-44.8223
479.716	71.35	40	91.1055
479.716	71.4	40	133.706
479.716	71.45	40	-122.191
479.716	71.5	40	152.827
479.716	71.55	40	-67.0554
479.716	71.6	40	37.2739
479.716	71.65	40	32.0568
479.716	71.7	40	29.9618
479.716	71.75	40	10.3789
479.716	71.8	40	-8.66079
479.716	71.85	40	77.7709
479.716	71.9	40	-2.18151
479.716	71.95	40	41.8054
479.716	72	40	146.794
479.716	72.05	40	47.2655
479.716	72.1	40	19.3055
479.716	72.15	40	86.9381
479.716	72.2	40	-4.60301
479.716	72.25	40	2.74152
479.716	72.3	40	27.9148
479.716	72.35	40	55.1405
479.716	72.4	40	-19.9765
479.716	72.45	40	64.9504
479.716	72.5	40	-21.2414
479.716	72.55	40	50.1378
479.716	72.6	40	26.9858
479.716	72.65	40	69.8128
479.716	72.7	40	71.4858
479.716	72.75	40	28.4887
479.716	72.8	40	-19.3224
479.716	72.85	40	57.5368
479.716	72.9	40	99.5887
479.716	72.95	40	76.1068
479.716	73	40	4.89922
479.716	73.05	40	114.715
479.716	73.1	40	197.928
479.716	73.15	40	28.4731
479.716	73.2	40	-6.60581
479.716	73.25	40	92.2782
479.716	73.3	40	62.19
479.716	73.35	40	19.4483
479.716	73.4	40	109.624
479.716	73.45	40	29.3674
479.716	73.5	40	67.3337
479.716	73.55	40	116.54
479.716	73.6	40	21.2848
479.716	73.65	40	44.7932
479.716	73.7	40	61.9677
479.716	73.75	40	100.532
479.716	73.8	40	5.69221
479.716	73.85	40	-0.981258
479.716	73.9	40	144.22
479.716	73.95	40	134.121
479.716	74	40	87.2046
479.716	74.05	40	43.3056
479.716	74.1	40	-38.992
479.716	74.15	40	48.614
479.716	74.2	40	-11.4827
479.716	74.25	40	-4.40139
479.716	74.3	40	23.0753
479.716	74.35	40	67.9552
479.716	74.4	40	-12.3037
479.716	74.45	40	36.6579
479.716	74.5	40	-73.0716
479.716	74.55	40	57.912
479.716	74.6	40	130.057
479.716	74.65	40	-13.9007
479.716	74.7	40	5.29182
479.716	74.75	40	81.88
479.716	74.8	40	21.5974
479.716	74.85	40	17.3867
479.716	74.9	40	83.3997
479.716	74.95	40	-82.7813
479.716	75	40	56.0704
479.716	75.05	40	38.1872
479.716	75.1	40	-55.4882
479.716	75.15	40	43.6428
479.716	75.2	40	86.2303
479.716	75.25	40	-79.2759
		40	130.799
		40	143.861
		40	68.4632
		40	-100.496
		40	121.009
		40	111.092
		40	13.0571
		40	65.903
		40	61.5277
		40	42.4858
		40	14.3184
		40	-13.4221
		40	67.6707
		40	-29.7479
		40	51.0732
		40	61.1143
		40	-14.9693
		40	49.0617
		40	-13.4014
		40	24.9041
		40	171.238
		80	37.807
		80	18.6772
		80	-38.7998
		80	-13.2741
		80	-14.3283
		80	61.7856
		80	47.3355
		80	76.0766
		80	23.6609
		80	-11.8888
		80	150.809
		80	130.578
		80	89.8399
		80	35.1193
		80	48.8615
		80	37.9967
		80	38.0317
		80	69.9268
		80	27.8166
		80	-27.5514
		80	94.2737
		80	192.041
		80	-7.90091
		80	4.13037
		80	2.07849
		80	-36.5276
		80	63.0457
		80	121.799
		80	80.5421
		80	174.329
		80	101.408
		80	89.485
		80	124.866
		80	29.7134
		80	115.169
		80	26.1831
		80	71.0658
		80	143.178
		80	148.983
		80	145.928
		80	121.891
		80	27.6001
		80	35.7206
		80	123.357
		80	40.6411
		80	117.301
		80	134.226
		80	18.2884
		80	32.4383
		80	94.6779
		80	89.7523
		80	135.578
		80	127.576
		80	133.46
		80	116.831
		80	50.0788
		80	85.0094
		80	79.3987
		80	152.532
		80	96.9707
		80	45.6348
		80	-14.5268
		80	64.466
		80	198.576
		80	43.3332
		80	106.616
		80	75.3119
		80	70.9759
		80	71.6071
		80	23.7751
		80	-28.6852
		80	4.41376
		80	27.8623
		80	74.9577
		80	42.9898
		80	101.033
		80	104.155
		80	116.26
		80	-64.5849
		80	144.821
		80	76.8326
		80	4.52944
		80	144.966
		80	30.3985
		80	105.085
		80	105.12
		80	128.277
		80	60.8432
		80	68.7324
		80	99.8156
		80	150.421
		80	49.7272
		80	109.829
		80	99.0256
		80	150.394
		80	-8.05289
		80	-26.012
		80	142.413
		80	133.106
		80	107.023
		80	58.3835
		80	20.6643
		80	1.73911
		80	71.5937
		80	127.436
		80	138.997
		80	58.5281
		80	134.727
		80	7.53763
		80	43.2739
		80	48.2958
		80	42.5776
		80	147.443
		80	79.314
		80	78.7781
		80	108.313
		80	153.871
		80	-6.38651
		80	89.585
		80	157.094
		80	-105.89
		80	46.3181
		80	-27.8999
		80	53.6893
		80	105.008
		80	98.7546
		80	-21.6925
		80	113.634
		80	142.4
		80	49.2458
		80	22.2201
		80	88.002
		80	118.741
		80	37.7349
		80	45.7852
		80	53.5001
		80	129.905
		80	104.287
		80	118.519
		80	176.305
		80	15.7667
		80	45.7261
		80	125.396
		80	137.2
		80	234.823
		80	-27.4495
		80	99.6637
		80	36.524
		80	135.341
		80	106.316
		80	72.0981
		80	90.9089
		80	44.0709
		80	169.979
		80	169.469
		80	69.2138
		80	113.14
		80	56.3456
		80	104.634
		80	40.2548
		80	123.699
		80	21.9274
		80	105.839
		80	-31.76
		80	-27.4139
		80	70.0323
		80	30.4322
		80	53.3589
		80	73.8915
		80	7.61806
		80	90.765
		80	137.447
		80	77.4489
		80	234.82
		80	120.766
		80	102.294
		80	36.9432
		80	70.9046
		80	186.017
		80	-8.40592
		80	39.1871
		80	123.048
		80	172.576
		80	58.029
		80	109.156
		80	128.292
		80	127.66
		80	-76.1508
		80	33.4637
		80	119.081
		80	25.1785
		80	58.8102
		80	1.46842
		80	30.606
		80	70.0995
		80	117.311
		80	42.3008
		80	-62.3649
		80	71.5266
		80	129.081
		80	79.2946
		80	77.9002
		80	111.36
		80	91.634
		80	-11.3928
		80	89.9171
		80	128.568
		80	42.8479
		80	5.8208
		80	155.851
		80	139.33
		80	96.6813
		80	166.415
		80	196.387
		80	163.16
		80	66.9555
		80	158.11
		80	184.524
		80	30.198
		80	-29.2068
		80	85.7889
		80	229.728
		80	-1.463
		80	97.5393
		80	119.703
		80	124.836
		80	69.7962
		80	147.093
		80	89.3075
		80	91.8182
		80	93.3117
		80	71.264
		80	166.985
		80	106.595
		80	117.619
		80	107.176
		80	67.7027
		80	134.035
		80	151.195
		80	197.057
		80	162.601
		80	42.0656
		80	95.6577
		80	82.5561
		80	49.0413
		80	74.3661
		80	1.37484
		80	110.538
		80	137.338
		80	5.53736
		80	149.276
		80	103.192
		80	54.7167
		80	-27.0381
		80	12.8525
		80	100.748
		80	81.5203
		80	126.338
		80	-60.9037
		80	130.096
		80	79.3321
		80	69.8962
		80	40.9461
		80	24.2483
		80	164.925
		80	67.4123
		80	79.5336
		80	49.725
		80	52.4006
		80	109.377
		80	86.6528
		80	117.644
		80	60.3521
		80	149.755
		80	83.3423
		80	152.217
		80	41.6103
		80	127.219
		80	125.488
		80	66.8446
		80	86.3691
		80	137.579
		80	62.9629
		80	86.264
		80	13.974
		80	-22.6131
		80	26.4433
		80	124.706
		80	52.169
		80	45.7956
		80	86.7409
		80	-39.054
		80	147.59
		80	89.3086
		80	175.484
		80	92.3211
		80	83.5883
		80	136.96
		80	100.588
		80	127.217
		80	89.7684
		80	60.839
		80	-17.1989
		80	204.567
		80	114.577
		80	119.404
		80	21.4417
		80	66.3822
		80	186.014
		80	162.559
		80	115.108
		80	55.8999
		80	99.755
		80	42.9229
		80	43.285
		80	65.3818
		80	88.5779
		80	30.6473
		80	45.2747
		80	17.4833
		80	-6.87781
		80	6.18518
		80	71.5566
		80	58.3998
		80	61.0099
		80	52.4406
		80	23.2336
		80	47.312
		80	97.0873
		80	51.773
		80	22.8799
		80	59.1838
		80	108.958
		80	52.2939
		80	50.1045
		80	93.771
		80	-86.3244
		80	99.6403
		80	165.889
		80	114.965
		80	67.5712
		80	121.773
		80	109.326
		80	73.6251
		80	123.148
		80	-10.6295
		80	38.3533
		80	18.5394
		80	39.1373
		80	97.2475
		80	114.383
		80	57.4514
		80	149.377
		80	202.809
		80	-34.4734
		80	162.081
		80	167.427
		80	105.566
		80	114.421
		80	-63.3361
		80	128.85
		80	48.4717
		80	116.7
		80	76.8374
		80	189.848
		80	112.261
		80	118.081
		80	99.0923
		80	115.362
		80	28.394
		80	139.289
		80	-10.5414
		80	77.2965
		80	242.415
		80	130.014
		80	197.723
		80	89.7152
		80	69.181
		80	101.847
		80	-23.2389
		80	67.8792
		80	129.903
		80	20.8575
		80	129.418
		80	87.9798
		80	27.09
		80	60.9263
		80	141.668
		80	41.4412
		80	-11.5692
		80	53.9787
		80	100.343
		80	71.7985
		80	103.107
		80	71.9316
		80	73.2932
		80	31.2696
		80	53.7323
		80	115.312
		80	114.659
		80	119.781
		80	-13.4184
		80	62.181
		80	106.382
		80	147.168
		120	253.037
		120	129.028
		120	106.691
		120	155.642
		120	115.716
		120	32.8355
		120	99.8084
		120	15.876
		120	119.735
		120	155.038
		120	160.574
		120	167.47
		120	194.55
		120	252.397
		120	85.9815
		120	67.6985
		120	81.4816
		120	90.8921
		120	121.435
		120	64.5429
		120	136.817
		120	-5.10894
		120	77.933
		120	111.564
		120	144.148
		120	283.944
		120	100.409
		120	157.679
		120	85.8204
		120	108.535
		120	144.813
		120	168.832
		120	119.479
		120	102.06
		120	318.418
		120	112.729
		120	-17.5276
		120	126.693
		120	-2.74038
		120	132.32
		120	105.034
		120	123.429
		120	90.4154
		120	-15.4733
		120	153.942
		120	170.369
		120	122.719
		120	161.497
		120	148.601
		120	28.3533
		120	217.379
		120	209.612
		120	115.484
		120	115.551
		120	99.5518
		120	128.017
		120	209.792
		120	110.176
		120	151.986
		120	74.797
		120	27.3115
		120	111.22
		120	203.474
		120	166.274
		120	30.6329
		120	142.141
		120	219.595
[truncated: 13,063 more rows]

## Sheet: B
12 Lk/Min simulation T-test Y values	12 Lk/Min simulation T-Test time points	12 Lk/Min simulation Simulated data without noise (0.005 s per point time scaling)	12 Lk/Min simulation Simulated data (0.005 s per point time scaling)
1.43613	0	0	4.71426
1.43613	0.05	0	36.7364
1.43613	0.1	0	-51.1953
1.43613	0.15	0	-84.1579
1.43613	0.2	0	-16.4042
1.43613	0.25	0	29.6052
1.43613	0.3	0	114.039
1.43613	0.35	0	-57.4813
1.43613	0.4	0	4.09521
1.43613	0.45	0	74.7164
1.43613	0.5	0	5.22214
1.43613	0.55	0	-76.0746
1.43613	0.6	0	-28.7898
1.43613	0.65	0	-12.6227
1.43613	0.7	0	-54.0374
1.43613	0.75	0	46.831
1.43613	0.8	0	39.4381
1.43613	0.85	0	17.4607
1.43613	0.9	0	-36.4861
1.43613	0.95	0	11.175
1.43613	1	0	2.26586
1.43613	1.05	0	45.9241
1.43613	1.1	0	26.9195
1.43613	1.15	0	37.6539
1.43613	1.2	0	18.6542
1.43613	1.25	0	-95.8444
1.43613	1.3	0	-51.4683
1.43613	1.35	0	62.8058
1.43613	1.4	0	45.1038
1.43613	1.45	0	44.3652
1.43613	1.5	0	14.3895
1.43613	1.55	0	-30.1148
1.43613	1.6	0	-2.95313
1.43613	1.65	0	44.8919
1.43613	1.7	0	-32.9298
1.43613	1.75	0	-76.5165
1.43613	1.8	0	-54.8909
1.43613	1.85	0	-17.8374
1.43613	1.9	0	-19.1511
1.43613	1.95	0	-41.7632
4.21628	2	0	109.497
7.47648	2.05	0	44.6005
10.7367	2.1	0	-51.5613
13.9969	2.15	0	-2.89014
17.2571	2.2	0	67.1695
20.5173	2.25	0	-59.2442
23.7775	2.3	0	-72.9604
27.0377	2.35	0	-2.91447
30.2979	2.4	0	19.0118
33.5581	2.45	0	28.1791
36.8183	2.5	0	2.58204
39.5672	2.55	0	101.419
39.5672	2.6	0	-10.4855
39.5672	2.65	0	-135.149
39.5672	2.7	0	-44.8255
39.5672	2.75	0	-19.2279
39.5672	2.8	0	-63.7805
39.5672	2.85	0	29.5679
39.5672	2.9	0	58.5211
39.5672	2.95	0	1.32473
39.5672	3	0	-7.5123
39.5672	3.05	0	-44.2764
39.5672	3.1	0	4.11176
39.5672	3.15	0	-0.67624
39.5672	3.2	0	-55.5464
39.5672	3.25	0	73.161
39.5672	3.3	0	53.4752
39.5672	3.35	0	16.4268
39.5672	3.4	0	29.6129
39.5672	3.45	0	29.7224
39.5672	3.5	0	-131.363
39.5672	3.55	0	69.3626
39.5672	3.6	0	6.35397
39.5672	3.65	0	21.43
39.5672	3.7	0	-59.2561
39.5672	3.75	0	-72.6728
39.5672	3.8	0	84.9123
39.5672	3.85	0	-77.7175
39.5672	3.9	0	18.3068
39.5672	3.95	0	-23.8418
39.5672	4	0	-25.2625
39.5672	4.05	0	-97.1094
39.5672	4.1	0	-1.57487
39.5672	4.15	0	75.9362
39.5672	4.2	0	85.5947
39.5672	4.25	0	130.224
39.5672	4.3	0	-97.4309
39.5672	4.35	0	-75.4389
39.5672	4.4	0	42.9336
39.5672	4.45	0	17.4125
39.5672	4.5	0	-53.6744
39.5672	4.55	0	-5.59807
39.5672	4.6	0	-32.513
39.5672	4.65	0	-68.9577
39.5672	4.7	0	39.333
39.5672	4.75	0	36.8515
39.5672	4.8	0	86.5843
39.5672	4.85	0	-87.3708
39.5672	4.9	0	38.9892
39.5672	4.95	0	-42.1656
39.5672	5	0	7.61497
39.5672	5.05	0	-14.3203
39.5672	5.1	0	-24.7022
39.5672	5.15	0	13.6261
39.5672	5.2	0	43.0886
39.5672	5.25	0	-48.7843
39.5672	5.3	0	21.7447
39.5672	5.35	0	-67.0056
39.5672	5.4	0	97.704
39.5672	5.45	0	56.608
39.5672	5.5	0	-107.867
39.5672	5.55	0	47.351
39.5672	5.6	0	0.0112142
39.5672	5.65	0	18.9287
39.5672	5.7	0	-2.34359
39.5672	5.75	0	-60.138
39.5672	5.8	0	4.2187
39.5672	5.85	0	78.9237
39.5672	5.9	0	-11.2412
39.5672	5.95	0	-15.8655
39.5672	6	0	46.486
39.5672	6.05	0	176.367
39.5672	6.1	0	-5.2617
39.5672	6.15	0	58.2294
39.5672	6.2	0	-36.7955
39.5672	6.25	0	-18.7534
39.5672	6.3	0	132.809
39.5672	6.35	0	-47.0904
39.5672	6.4	0	-10.1156
39.5672	6.45	0	-3.99656
39.5672	6.5	0	32.5577
39.5672	6.55	0	-39.5335
39.5672	6.6	0	-82.0956
39.5672	6.65	0	80.7165
39.5672	6.7	0	5.07482
39.5672	6.75	0	-43.5968
39.5672	6.8	0	-33.1507
39.5672	6.85	0	63.9323
39.5672	6.9	0	-29.5489
39.5672	6.95	0	10.8594
39.5672	7	0	129.361
39.5672	7.05	0	-172.382
39.5672	7.1	0	-2.44305
39.5672	7.15	0	14.3708
39.5672	7.2	0	67.3182
39.5672	7.25	0	-17.646
39.5672	7.3	0	-60.207
39.5672	7.35	0	-64.0112
39.5672	7.4	0	-24.9392
39.5672	7.45	0	51.7347
39.5672	7.5	0	49.1358
39.5672	7.55	0	-44.8663
39.5672	7.6	0	-10.7428
39.5672	7.65	0	22.212
39.5672	7.7	0	-49.4065
39.5672	7.75	0	-79.0039
39.5672	7.8	0	90.9085
39.5672	7.85	0	-34.1218
39.5672	7.9	0	-130.796
39.5672	7.95	0	5.40341
39.5672	8	0	-54.9591
39.5672	8.05	0	46.347
39.5672	8.1	0	30.899
39.5672	8.15	0	-9.94188
39.5672	8.2	0	-1.79164
39.5672	8.25	0	21.3969
39.5672	8.3	0	-118.976
39.5672	8.35	0	-19.7513
39.5672	8.4	0	-46.6486
39.5672	8.45	0	-12.5964
39.5672	8.5	0	133.968
39.5672	8.55	0	52.2426
39.5672	8.6	0	-12.5581
39.5672	8.65	0	5.90406
39.5672	8.7	0	138.695
39.5672	8.75	0	-24.2056
39.5672	8.8	0	-29.7336
39.5672	8.85	0	-7.4355
39.5672	8.9	0	-5.64358
39.5672	8.95	0	-62.8306
39.5672	9	0	71.3264
39.5672	9.05	0	-26.9237
39.5672	9.1	0	177.707
39.5672	9.15	0	-5.89107
39.5672	9.2	0	95.5304
39.5672	9.25	0	-18.9804
39.5672	9.3	0	54.5379
39.5672	9.35	0	36.7814
39.5672	9.4	0	1.91411
39.5672	9.45	0	-18.1665
39.5672	9.5	0	16.5383
39.5672	9.55	0	84.7476
39.5672	9.6	0	93.3989
39.5672	9.65	0	45.9972
39.5672	9.7	0	80.6675
39.5672	9.75	0	-49.2294
39.5672	9.8	0	69.3843
39.5672	9.85	0	31.1571
39.5672	9.9	0	126.135
39.5672	9.95	0	-14.468
39.5672	10	0	38.0725
39.5672	10.05	0	-29.479
39.5672	10.1	0	68.9364
39.5672	10.15	0	4.21908
39.5672	10.2	0	37.0394
39.5672	10.25	0	22.1651
39.5672	10.3	0	23.4455
39.5672	10.35	0	16.2125
39.5672	10.4	0	36.9146
39.5672	10.45	0	-40.9103
39.5672	10.5	0	-59.3469
39.5672	10.55	0	23.0697
39.5672	10.6	0	8.62911
39.5672	10.65	0	-72.1243
39.5672	10.7	0	-15.3363
39.5672	10.75	0	13.8514
39.5672	10.8	0	-25.9808
39.5672	10.85	0	68.8573
39.5672	10.9	0	37.1357
39.5672	10.95	0	18.1672
39.5672	11	0	-108.587
39.5672	11.05	0	-71.9998
39.5672	11.1	0	-12.5269
39.5672	11.15	0	-8.99789
39.5672	11.2	0	68.9638
39.5672	11.25	0	14.799
39.5672	11.3	0	18.5451
39.5672	11.35	0	70.8118
39.5672	11.4	0	80.1196
39.5672	11.45	0	-32.2519
39.5672	11.5	0	-57.7139
39.5672	11.55	0	-51.1091
39.5672	11.6	0	-63.0607
39.5672	11.65	0	-46.7545
39.5672	11.7	0	3.57051
39.5672	11.75	0	53.5254
39.5672	11.8	0	-78.3433
39.5672	11.85	0	10.5072
39.5672	11.9	0	25.6002
39.5672	11.95	0	-51.0206
39.5672	12	0	-62.5226
39.5672	12.05	0	-67.4512
39.5672	12.1	0	-33.3443
39.5672	12.15	0	17.8398
39.5672	12.2	0	-25.3996
39.5672	12.25	0	60.959
39.5672	12.3	0	55.8062
39.5672	12.35	0	76.3217
39.5672	12.4	0	72.0404
39.5672	12.45	0	49.6516
39.5672	12.5	0	-13.9001
39.5672	12.55	0	-69.1807
39.5672	12.6	0	-87.3321
39.5672	12.65	0	4.23035
39.5672	12.7	0	64.2544
39.5672	12.75	0	-0.579767
39.5672	12.8	0	90.8814
39.5672	12.85	0	-29.2723
39.5672	12.9	0	40.0547
39.5672	12.95	0	-9.25058
39.5672	13	0	55.8978
39.5672	13.05	0	-30.3217
39.5672	13.1	0	-15.066
39.5672	13.15	0	-58.1956
39.5672	13.2	0	-14.4181
39.5672	13.25	0	-96.6524
39.5672	13.3	0	-52.6363
39.5672	13.35	0	36.9883
39.5672	13.4	0	13.1694
39.5672	13.45	0	19.4855
39.5672	13.5	0	-55.7607
39.5672	13.55	0	114.471
39.5672	13.6	0	-12.2614
39.5672	13.65	0	87.4685
39.5672	13.7	0	-51.6782
39.5672	13.75	0	48.0376
39.5672	13.8	0	-66.5286
39.5672	13.85	0	-11.6869
39.5672	13.9	0	87.1434
39.5672	13.95	0	25.5282
39.5672	14	0	92.9427
39.5672	14.05	0	-73.1279
39.5672	14.1	0	2.9583
39.5672	14.15	0	-8.67747
40.0988	14.2	0	21.8293
43.6716	14.25	0	39.7907
47.2444	14.3	0	-11.0893
50.8173	14.35	0	-52.8171
54.3901	14.4	0	-26.2546
57.963	14.45	0	-3.92149
61.5358	14.5	0	0.590414
65.1086	14.55	0	30.0693
68.6815	14.6	0	45.0318
72.2543	14.65	0	-32.6534
75.8272	14.7	0	26.9412
79.4	14.75	0	-39.7411
81.3778	14.8	0	12.4874
81.3778	14.85	0	48.8852
81.3778	14.9	0	26.1519
81.3778	14.95	0	-45.8624
81.3778	15	0	-9.41899
81.3778	15.05	0	84.0051
81.3778	15.1	0	-11.1644
81.3778	15.15	0	46.0102
81.3778	15.2	0	19.9649
81.3778	15.25	0	-3.0034
81.3778	15.3	0	26.0423
81.3778	15.35	0	-69.8775
81.3778	15.4	0	-0.914155
81.3778	15.45	0	141.048
81.3778	15.5	0	-75.215
81.3778	15.55	0	-1.59394
81.3778	15.6	0	-73.7315
81.3778	15.65	0	-0.180204
81.3778	15.7	0	87.9284
81.3778	15.75	0	-40.1373
81.3778	15.8	0	1.43732
81.3778	15.85	0	-94.4292
81.3778	15.9	0	-2.43943
81.3778	15.95	0	-49.098
81.3778	16	0	23.411
81.3778	16.05	0	17.5077
81.3778	16.1	0	102.816
81.3778	16.15	0	52.7456
81.3778	16.2	0	-33.5843
81.3778	16.25	0	59.3441
81.3778	16.3	0	65.1876
81.3778	16.35	0	107.784
81.3778	16.4	0	36.6624
81.3778	16.45	0	-26.705
81.3778	16.5	0	92.2455
81.3778	16.55	0	-80.6116
81.3778	16.6	0	22.8207
81.3778	16.65	0	16.4116
81.3778	16.7	0	-79.706
81.3778	16.75	0	-20.381
81.3778	16.8	0	-76.7419
81.3778	16.85	0	-40.1221
81.3778	16.9	0	-58.6305
81.3778	16.95	0	-35.4278
81.3778	17	0	-94.9248
81.3778	17.05	0	49.5895
81.3778	17.1	0	68.9225
81.3778	17.15	0	63.7087
81.3778	17.2	0	0.844099
81.3778	17.25	0	-1.22674
81.3778	17.3	0	-71.7265
81.3778	17.35	0	74.3561
81.3778	17.4	0	-73.4717
81.3778	17.45	0	54.7974
81.3778	17.5	0	-37.259
81.3778	17.55	0	20.9162
81.3778	17.6	0	98.7074
81.3778	17.65	0	2.47962
81.3778	17.7	0	-86.078
81.3778	17.75	0	-97.8914
81.3778	17.8	0	32.597
81.3778	17.85	0	21.2681
81.3778	17.9	0	76.0068
81.3778	17.95	0	-6.61625
81.3778	18	0	-1.45421
81.3778	18.05	0	59.5061
81.3778	18.1	0	7.68447
81.3778	18.15	0	-45.5347
81.3778	18.2	0	-132.977
81.3778	18.25	0	-77.6039
81.3778	18.3	0	36.6448
81.3778	18.35	0	-83.4038
81.3778	18.4	0	-71.9395
81.3778	18.45	0	67.0767
81.3778	18.5	0	28.3033
81.3778	18.55	0	-25.673
81.3778	18.6	0	26.1682
81.3778	18.65	0	26.2062
81.3778	18.7	0	34.4639
81.3778	18.75	0	-128.188
81.3778	18.8	0	-1.16335
81.3778	18.85	0	-7.26623
81.3778	18.9	0	35.3039
81.3778	18.95	0	47.0488
81.3778	19	0	-177.01
81.3778	19.05	0	-42.4078
81.3778	19.1	0	-107.33
81.3778	19.15	0	86.5823
81.3778	19.2	0	-43.1796
81.3778	19.25	0	30.592
81.3778	19.3	0	-3.35055
81.3778	19.35	0	-12.182
81.3778	19.4	0	-64.7946
81.3778	19.45	0	-17.2857
81.3778	19.5	0	24.8432
81.3778	19.55	0	146.292
81.3778	19.6	0	-125.083
81.3778	19.65	0	-93.8257
81.3778	19.7	0	3.6583
81.3778	19.75	0	34.4123
81.3778	19.8	0	48.8094
81.3778	19.85	0	-121.059
81.3778	19.9	0	-24.8636
81.3778	19.95	0	25.6584
81.3778	20	0	-26.9546
81.3778	20.05	0	28.1655
81.3778	20.1	0	-26.8212
81.3778	20.15	0	36.3593
81.3778	20.2	0	30.2864
81.3778	20.25	0	-85.3197
81.3778	20.3	0	77.6878
81.3778	20.35	0	-24.5341
81.3778	20.4	0	9.7389
81.3778	20.45	0	45.4818
81.3778	20.5	0	-16.2321
81.3778	20.55	0	87.4473
81.3778	20.6	0	-57.5679
81.3778	20.65	0	-18.2495
81.3778	20.7	0	-35.8342
81.3778	20.75	0	-66.035
81.3778	20.8	0	-25.3402
81.3778	20.85	0	-5.34768
81.3778	20.9	0	-33.8428
81.3778	20.95	0	40.0881
81.3778	21	0	23.6952
81.3778	21.05	0	16.0502
81.3778	21.1	0	13.6855
81.3778	21.15	0	-16.849
81.3778	21.2	0	65.9147
81.3778	21.25	0	-46.6093
81.3778	21.3	0	-33.6099
81.3778	21.35	0	-88.1508
81.3778	21.4	0	114.713
81.3778	21.45	0	39.931
81.3778	21.5	0	5.90375
81.3778	21.55	0	-10.8619
81.3778	21.6	0	-26.9585
81.3778	21.65	0	25.8468
81.3778	21.7	0	-195.952
81.3778	21.75	0	24.6057
81.3778	21.8	0	50.9357
81.3778	21.85	0	118.603
81.3778	21.9	0	-50.4619
81.3778	21.95	0	-181.672
81.3778	22	0	98.9317
81.3778	22.05	0	9.04917
81.3778	22.1	0	-14.4772
81.3778	22.15	40	7.34071
81.3778	22.2	40	-0.139355
81.3778	22.25	40	67.8174
81.3778	22.3	40	-14.1383
81.3778	22.35	40	39.8908
81.3778	22.4	40	143.898
81.3778	22.45	40	22.1666
81.3778	22.5	40	-103.499
81.3778	22.55	40	8.33792
81.3778	22.6	40	139.478
81.3778	22.65	40	8.24842
81.3778	22.7	40	58.9885
81.3778	22.75	40	-31.6808
81.3778	22.8	40	58.0502
81.3778	22.85	40	-0.872915
81.3778	22.9	40	22.7572
81.3778	22.95	40	72.1435
81.3778	23	40	44.5174
81.3778	23.05	40	-26.6645
81.3778	23.1	40	55.9977
81.3778	23.15	40	127.438
81.3778	23.2	40	11.1606
81.3778	23.25	40	77.6668
81.3778	23.3	40	-18.2504
81.3778	23.35	40	92.8533
81.3778	23.4	40	13.4353
81.3778	23.45	40	47.9948
81.3778	23.5	40	72.375
81.3778	23.55	40	-15.4977
81.3778	23.6	40	25.2789
81.3778	23.65	40	56.3258
81.3778	23.7	40	74.6581
81.3778	23.75	40	76.5446
81.3778	23.8	40	34.884
81.3778	23.85	40	32.5097
81.3778	23.9	40	63.9872
81.3778	23.95	40	-36.0576
81.3778	24	40	52.183
81.3778	24.05	40	3.4832
81.3778	24.1	40	91.7986
81.3778	24.15	40	56.4842
81.3778	24.2	40	33.2065
81.3778	24.25	40	93.0232
81.3778	24.3	40	48.1415
81.3778	24.35	40	39.7183
81.3778	24.4	40	-41.7664
81.3778	24.45	40	60.7644
81.3778	24.5	40	-10.7447
81.3778	24.55	40	32.3683
81.6179	24.6	40	113.423
85.1382	24.65	40	125.664
88.6585	24.7	40	27.5623
92.1788	24.75	40	61.1323
95.6991	24.8	40	55.481
99.2194	24.85	40	14.0827
102.74	24.9	40	-71.3755
106.26	24.95	40	-13.7576
109.78	25	40	-23.415
113.301	25.05	40	-48.1368
116.821	25.1	40	49.3739
120.341	25.15	40	15.2352
121.434	25.2	40	71.5287
121.434	25.25	40	4.48381
121.434	25.3	40	143.254
121.434	25.35	40	-1.0532
121.434	25.4	40	85.6493
121.434	25.45	40	166.779
121.434	25.5	40	-41.6637
121.434	25.55	40	71.4045
121.434	25.6	40	59.5788
121.434	25.65	40	14.5233
121.434	25.7	40	-12.3182
121.434	25.75	40	95.334
121.434	25.8	40	-32.9642
121.434	25.85	40	6.57552
121.434	25.9	40	107.533
121.434	25.95	40	-12.1076
121.434	26	40	-10.7267
121.434	26.05	40	124.339
121.434	26.1	40	-24.9731
121.434	26.15	40	113.606
121.434	26.2	40	28.6908
121.434	26.25	40	154.652
121.434	26.3	40	53.7938
121.434	26.35	40	103.199
121.434	26.4	40	74.435
121.434	26.45	40	69.9129
121.434	26.5	40	55.7279
121.434	26.55	40	1.03517
121.434	26.6	40	-20.9193
121.434	26.65	40	54.6088
121.434	26.7	40	-124.373
121.434	26.75	40	56.8173
121.434	26.8	40	82.8837
121.434	26.85	40	86.3986
121.434	26.9	40	-30.8556
121.434	26.95	40	136.365
121.434	27	40	72.6879
121.434	27.05	40	-117.036
121.434	27.1	40	23.1992
121.434	27.15	40	69.3319
121.434	27.2	40	90.0269
121.434	27.25	40	-7.16592
121.434	27.3	40	28.584
121.434	27.35	40	27.9609
121.434	27.4	40	19.4014
121.434	27.45	40	126.589
121.434	27.5	40	25.1268
121.434	27.55	40	73.3032
121.434	27.6	40	87.5726
121.434	27.65	40	67.0705
121.434	27.7	40	160.984
121.434	27.75	40	47.6789
121.434	27.8	40	45.8118
121.434	27.85	40	103.439
121.434	27.9	40	94.6732
121.434	27.95	40	26.2367
121.434	28	40	59.023
121.434	28.05	40	27.0566
121.434	28.1	40	-9.32277
121.434	28.15	40	-9.72194
121.434	28.2	40	41.965
121.434	28.25	40	-31.6505
121.434	28.3	40	-0.876955
121.434	28.35	40	-3.49354
121.434	28.4	40	103.118
121.434	28.45	40	109.044
121.434	28.5	40	5.33676
121.434	28.55	40	54.6519
121.434	28.6	40	113.38
121.434	28.65	40	-31.6645
121.434	28.7	40	45.8236
121.434	28.75	40	54.2932
121.434	28.8	40	106.187
121.434	28.85	40	210.072
121.434	28.9	40	127.506
121.434	28.95	40	95.6413
121.434	29	40	8.17651
121.434	29.05	40	-60.3237
121.434	29.1	40	68.0875
121.434	29.15	40	-17.0035
121.434	29.2	40	-31.6178
121.434	29.25	40	105.521
121.434	29.3	40	118.443
121.434	29.35	40	-22.9289
121.434	29.4	40	-66.4392
121.434	29.45	40	103.252
121.434	29.5	40	-53.4426
121.434	29.55	40	36.6216
121.434	29.6	40	106.063
121.434	29.65	40	-31.1709
121.434	29.7	40	-8.72388
121.434	29.75	40	23.9571
121.434	29.8	40	20.3736
121.434	29.85	40	46.1705
121.434	29.9	40	87.9294
121.434	29.95	40	31.4727
121.434	30	40	7.76547
121.434	30.05	40	96.2233
121.434	30.1	40	-29.695
121.434	30.15	40	52.6471
121.434	30.2	40	38.0208
121.434	30.25	40	125.477
121.434	30.3	40	42.761
121.434	30.35	40	115.358
121.434	30.4	40	48.1662
121.434	30.45	40	20.3009
121.434	30.5	40	153.471
121.434	30.55	40	92.0305
121.434	30.6	40	104.114
121.434	30.65	40	51.978
121.434	30.7	40	20.0791
121.434	30.75	40	96.75
121.434	30.8	40	35.4745
121.434	30.85	40	-56.0983
121.434	30.9	40	72.7079
121.434	30.95	40	105.273
121.434	31	40	9.59272
121.434	31.05	40	40.4078
121.434	31.1	40	75.7708
121.434	31.15	40	41.5677
121.434	31.2	40	51.4329
121.434	31.25	40	72.2075
121.434	31.3	40	100.349
121.434	31.35	40	-27.4364
121.434	31.4	40	126.575
121.434	31.45	40	14.2538
121.434	31.5	40	28.636
121.434	31.55	40	63.523
121.434	31.6	40	-18.8726
121.434	31.65	40	191.236
121.434	31.7	40	51.5691
121.434	31.75	40	7.3333
121.434	31.8	40	12.4119
121.434	31.85	40	-30.3838
121.434	31.9	40	-10.5151
121.434	31.95	40	15.9742
121.434	32	40	55.4174
121.434	32.05	40	-21.9714
122.194	32.1	40	-20.2664
125.567	32.15	40	-51.8369
128.94	32.2	40	-38.2492
132.314	32.25	40	167.836
135.687	32.3	40	99.2111
139.061	32.35	40	-87.9562
142.434	32.4	40	100.513
145.807	32.45	40	-92.2134
149.181	32.5	40	106.469
152.554	32.55	40	-4.9221
155.928	32.6	40	-26.9456
159.301	32.65	40	-3.25205
161.44	32.7	40	16.4348
161.44	32.75	40	96.8552
161.44	32.8	40	169.402
161.44	32.85	40	60.7198
161.44	32.9	40	150.605
161.44	32.95	40	-4.29718
161.44	33	40	35.6608
161.44	33.05	40	46.707
161.44	33.1	40	-36.1183
161.44	33.15	40	15.4567
161.44	33.2	40	-30.1863
161.44	33.25	40	46.5436
161.44	33.3	40	-14.5736
161.44	33.35	40	101.709
161.44	33.4	40	120.289
161.44	33.45	40	55.1294
161.44	33.5	40	44.7917
161.44	33.55	40	-44.5594
161.44	33.6	40	-6.64632
161.44	33.65	40	173.142
161.44	33.7	40	27.3761
161.44	33.75	40	105.995
161.44	33.8	40	48.1653
161.44	33.85	40	3.73742
161.44	33.9	40	123.491
161.44	33.95	40	61.2935
161.44	34	40	65.6449
161.44	34.05	40	59.5326
161.44	34.1	40	7.98903
161.44	34.15	40	31.8505
161.44	34.2	40	99.1414
161.44	34.25	40	-32.0829
161.44	34.3	40	-30.7318
161.44	34.35	40	107.139
161.44	34.4	40	43.71
161.44	34.45	40	34.4579
161.44	34.5	40	-13.8445
161.44	34.55	40	42.9405
161.44	34.6	40	-4.71156
161.44	34.65	40	2.39945
161.44	34.7	40	39.6618
161.44	34.75	40	-3.73295
161.44	34.8	40	118.52
161.44	34.85	40	8.53091
161.44	34.9	40	-14.5933
161.44	34.95	40	84.1785
161.44	35	40	-8.34054
161.44	35.05	40	73.6098
161.44	35.1	40	163.509
161.44	35.15	40	193.683
161.44	35.2	40	107.224
161.44	35.25	40	65.7516
161.44	35.3	40	44.1424
161.44	35.35	40	54.6506
161.44	35.4	40	-45.6141
161.44	35.45	40	125.68
161.44	35.5	40	19.7582
161.44	35.55	40	-45.4493
161.44	35.6	40	98.7952
161.44	35.65	40	116.486
161.44	35.7	40	-14.042
161.44	35.75	40	-8.8371
161.44	35.8	40	144.857
161.44	35.85	40	73.6146
161.44	35.9	40	93.5092
161.44	35.95	40	49.1809
161.44	36	40	112.462
161.44	36.05	40	50.0367
161.44	36.1	40	76.5275
161.44	36.15	40	43.6149
161.44	36.2	40	11.3428
161.44	36.25	40	-25.4603
161.44	36.3	40	127.755
161.44	36.35	40	39.6468
161.44	36.4	40	46.0698
161.44	36.45	40	85.2906
161.44	36.5	40	-41.5026
161.44	36.55	40	-62.0622
161.44	36.6	40	74.949
161.44	36.65	40	19.4347
161.44	36.7	40	80.697
161.44	36.75	40	30.4879
161.44	36.8	40	77.1827
161.44	36.85	40	31.0653
161.44	36.9	40	58.1417
161.44	36.95	40	90.0735
161.44	37	40	-96.4398
161.44	37.05	40	86.9964
161.44	37.1	40	50.8675
161.44	37.15	40	57.259
161.44	37.2	40	21.3278
161.44	37.25	40	80.9691
161.44	37.3	40	-12.3802
161.44	37.35	40	-1.19874
161.44	37.4	40	20.1497
161.44	37.45	40	14.97
161.44	37.5	40	43.3484
161.44	37.55	40	35.2478
161.44	37.6	40	87.693
161.44	37.65	40	35.3423
161.44	37.7	40	24.0128
161.44	37.75	40	-16.0105
161.44	37.8	40	-4.35034
161.44	37.85	40	99.0449
161.44	37.9	40	-17.6557
161.44	37.95	40	30.08
161.44	38	40	31.1083
161.44	38.05	40	-28.0238
161.44	38.1	40	176.702
161.44	38.15	40	41.7927
161.44	38.2	40	16.6399
161.44	38.25	40	121.02
161.44	38.3	40	46.981
161.44	38.35	40	47.1255
161.44	38.4	40	177.185
161.44	38.45	40	133.977
161.44	38.5	40	12.867
161.44	38.55	40	144.275
161.44	38.6	40	56.4602
161.44	38.65	40	-42.5698
161.44	38.7	40	50.8873
161.44	38.75	40	-27.0109
161.44	38.8	40	-18.0268
161.44	38.85	40	63.5852
161.44	38.9	40	2.92502
161.44	38.95	40	30.8314
161.44	39	40	38.9692
161.44	39.05	40	56.9278
161.44	39.1	40	111.748
161.44	39.15	40	-101.436
161.44	39.2	40	-40.0141
161.44	39.25	40	54.6214
161.44	39.3	40	85.3367
161.44	39.35	40	101.597
161.44	39.4	40	45.3606
161.44	39.45	40	-31.7594
161.44	39.5	40	82.6282
161.44	39.55	40	109.672
161.44	39.6	40	-11.9772
161.44	39.65	40	0.85658
161.44	39.7	40	67.4132
161.44	39.75	40	12.987
161.44	39.8	40	68.1493
161.44	39.85	40	118.252
161.44	39.9	40	107.92
161.44	39.95	40	26.7475
161.44	40	40	87.8339
161.44	40.05	40	33.2934
161.44	40.1	40	93.1202
161.44	40.15	40	108.095
161.44	40.2	40	45.2792
161.44	40.25	40	-56.1718
161.44	40.3	40	60.2594
161.44	40.35	40	72.2619
161.44	40.4	40	23.5598
161.44	40.45	40	-65.6563
161.44	40.5	40	-7.85661
161.44	40.55	40	21.0695
161.44	40.6	40	38.6845
161.44	40.65	40	83.1164
161.44	40.7	40	-37.0147
161.44	40.75	40	0.285406
161.44	40.8	40	-8.79647
161.44	40.85	40	63.2164
161.44	40.9	40	62.7632
161.44	40.95	40	140.521
161.44	41	40	56.8804
161.44	41.05	40	39.8096
161.44	41.1	40	3.70077
161.44	41.15	40	161.989
161.44	41.2	40	58.2487
161.44	41.25	40	41.2357
161.44	41.3	40	15.7998
161.44	41.35	40	130.917
161.44	41.4	40	60.6348
161.44	41.45	40	-76.2412
161.44	41.5	40	2.90737
161.44	41.55	40	32.5431
161.44	41.6	40	71.0686
161.44	41.65	40	51.0491
161.44	41.7	40	141.8
161.44	41.75	40	-48.2182
161.44	41.8	40	-2.77725
161.44	41.85	40	92.5193
161.44	41.9	40	67.0781
161.44	41.95	40	-16.7215
161.44	42	40	99.8196
161.44	42.05	40	138.233
161.44	42.1	40	69.588
161.44	42.15	40	57.9002
161.44	42.2	40	34.4919
161.44	42.25	40	-55.5284
161.44	42.3	40	34.4568
161.44	42.35	40	43.7672
161.44	42.4	40	48.6339
161.44	42.45	40	39.5626
161.44	42.5	40	117.11
161.44	42.55	40	47.6493
161.44	42.6	40	-81.5808
161.44	42.65	40	68.7207
161.44	42.7	40	61.8792
161.44	42.75	40	41.8556
161.44	42.8	40	2.10938
161.44	42.85	40	-8.15079
161.44	42.9	40	-2.97256
161.44	42.95	40	22.2911
161.44	43	40	122.729
161.44	43.05	40	52.0815
161.44	43.1	40	-46.7126
161.44	43.15	40	86.5113
161.44	43.2	40	3.81576
161.44	43.25	40	37.5249
161.44	43.3	40	136.918
161.44	43.35	40	-26.8049
161.44	43.4	40	84.9913
161.44	43.45	40	-11.9307
161.44	43.5	40	102.802
161.44	43.55	40	135.495
161.44	43.6	40	-41.0429
161.44	43.65	40	31.9309
161.44	43.7	40	14.1057
161.44	43.75	40	14.6042
161.44	43.8	40	136.199
161.44	43.85	40	63.0186
161.44	43.9	40	-37.4809
161.44	43.95	40	125.225
161.44	44	40	-31.1201
161.44	44.05	40	-22.5786
161.44	44.1	40	26.8029
161.44	44.15	40	49.1022
161.44	44.2	40	64.2056
161.44	44.25	40	132.762
161.44	44.3	40	6.58409
161.44	44.35	40	82.4417
161.44	44.4	40	-24.3646
161.44	44.45	40	-3.11689
161.44	44.5	40	70.8806
161.44	44.55	40	70.2712
161.44	44.6	40	64.564
161.44	44.65	40	22.5721
161.44	44.7	40	33.467
161.44	44.75	40	-49.4336
161.44	44.8	40	71.3014
161.44	44.85	40	120.549
161.44	44.9	40	108.898
161.44	44.95	40	75.6188
161.44	45	40	28.0642
161.44	45.05	40	47.7447
161.44	45.1	40	24.2669
161.44	45.15	40	3.26716
161.44	45.2	40	117.443
161.44	45.25	40	27.0407
161.44	45.3	40	45.9591
161.44	45.35	40	-59.2228
161.44	45.4	40	13.1721
161.44	45.45	40	-45.6584
161.44	45.5	40	31.5793
161.44	45.55	40	-33.3468
161.44	45.6	40	128.697
161.44	45.65	40	75.1598
161.44	45.7	40	65.4899
161.44	45.75	40	67.7698
161.44	45.8	40	-7.46153
161.44	45.85	40	14.8972
161.44	45.9	40	-41.4851
161.44	45.95	40	110.217
161.44	46	40	-70.8529
161.44	46.05	40	54.0182
161.44	46.1	40	16.9274
161.44	46.15	40	40.1925
161.44	46.2	40	27.7078
161.44	46.25	40	43.0614
161.44	46.3	40	-8.95941
161.44	46.35	40	-60.0789
161.44	46.4	40	0.172009
161.44	46.45	40	-18.5061
161.44	46.5	40	55.0519
161.44	46.55	40	102.024
161.44	46.6	40	1.35264
161.44	46.65	40	0.354134
161.44	46.7	40	-47.8792
161.44	46.75	40	41.7987
161.44	46.8	40	141.276
161.44	46.85	40	-24.9288
161.44	46.9	40	60.7558
161.44	46.95	40	120.862
161.44	47	40	-32.1054
161.44	47.05	40	96.5633
161.44	47.1	40	60.1637
161.44	47.15	40	-34.6588
161.44	47.2	40	-19.2256
161.44	47.25	40	36.5509
161.44	47.3	40	28.6604
161.44	47.35	40	18.6197
161.44	47.4	40	34.2935
161.44	47.45	40	-18.1514
161.44	47.5	40	-15.8068
161.44	47.55	40	69.4235
161.44	47.6	40	111.77
161.44	47.65	40	76.185
161.44	47.7	40	86.7884
161.44	47.75	40	75.5471
161.44	47.8	40	2.7582
161.44	47.85	40	78.1906
161.44	47.9	40	145.349
161.44	47.95	40	-16.8438
161.44	48	40	55.8917
161.44	48.05	40	64.4448
161.44	48.1	40	191.057
161.44	48.15	40	-48.7806
161.44	48.2	40	16.3015
161.44	48.25	40	17.1897
161.44	48.3	40	-60.378
161.44	48.35	40	9.51722
161.44	48.4	40	100.008
161.44	48.45	40	9.72618
161.44	48.5	40	-61.743
161.44	48.55	40	43.5379
161.44	48.6	40	122.256
161.44	48.65	40	25.2509
161.44	48.7	40	8.02255
161.44	48.75	40	52.1711
161.44	48.8	40	35.9511
161.44	48.85	40	-21.1032
161.44	48.9	40	-3.08205
161.44	48.95	40	58.4493
161.44	49	40	28.3506
161.44	49.05	40	26.7774
161.44	49.1	40	142.831
161.44	49.15	40	46.1521
161.44	49.2	40	-92.8473
161.44	49.25	40	-71.4249
161.44	49.3	40	113.611
161.44	49.35	40	118.674
161.44	49.4	40	8.76401
161.44	49.45	40	9.99769
161.44	49.5	40	133.155
161.44	49.55	40	5.70598
161.44	49.6	40	113.619
161.44	49.65	40	118.418
161.44	49.7	40	90.6056
161.44	49.75	40	25.372
161.44	49.8	40	85.537
161.44	49.85	40	71.7531
161.44	49.9	40	42.2266
161.44	49.95	40	55.2708
161.44	50	40	144.605
161.44	50.05	40	5.98382
161.44	50.1	40	86.0664
161.44	50.15	40	139.417
161.44	50.2	40	133.304
161.44	50.25	40	134.772
161.44	50.3	40	77.5432
161.44	50.35	40	34.1845
161.44	50.4	40	-67.0712
161.44	50.45	40	25.1015
161.44	50.5	40	-34.726
161.44	50.55	40	116.642
161.44	50.6	40	-25.9132
161.44	50.65	40	138.307
161.44	50.7	40	64.072
161.44	50.75	40	56.2954
161.44	50.8	40	32.8997
161.44	50.85	40	-53.3475
161.44	50.9	40	85.7268
161.44	50.95	40	122.813
161.44	51	40	-30.2319
161.44	51.05	40	-13.0253
161.44	51.1	40	54.3602
161.44	51.15	40	-63.4254
161.44	51.2	40	-21.8037
161.44	51.25	40	-8.49767
161.44	51.3	40	39.6738
161.44	51.35	40	17.4001
161.44	51.4	40	-26.757
161.44	51.45	40	137.862
161.44	51.5	40	100.869
161.44	51.55	40	66.2924
161.44	51.6	40	-47.5104
161.44	51.65	40	-46.5102
161.44	51.7	40	-6.63006
161.44	51.75	40	51.5308
161.44	51.8	40	64.2459
161.44	51.85	40	-10.0772
161.44	51.9	40	-37.8286
161.44	51.95	40	-5.58863
161.44	52	40	192.914
161.44	52.05	40	85.1777
161.44	52.1	40	-45.6797
161.44	52.15	40	-100.05
161.44	52.2	40	-2.61421
161.44	52.25	40	16.2123
161.44	52.3	40	17.8191
161.44	52.35	40	117.581
161.44	52.4	40	119.146
161.44	52.45	40	3.05179
161.44	52.5	40	98.1235
161.44	52.55	40	51.2531
161.44	52.6	40	21.7942
161.44	52.65	40	-8.76933
161.44	52.7	40	-16.9034
161.44	52.75	40	-27.5421
161.44	52.8	40	-40.3855
161.44	52.85	40	-7.72097
161.44	52.9	40	55.1203
161.44	52.95	40	27.1602
161.44	53	40	23.4549
161.44	53.05	40	161.37
161.44	53.1	40	84.6989
161.44	53.15	40	-47.6985
161.44	53.2	40	40.4231
161.44	53.25	40	32.1481
161.44	53.3	40	-39.6375
161.44	53.35	40	39.3896
161.44	53.4	40	43.6453
161.44	53.45	40	0.0826301
161.44	53.5	40	20.1973
161.44	53.55	40	108.994
161.44	53.6	40	57.3891
161.44	53.65	40	-27.9106
161.44	53.7	40	-0.46382
161.44	53.75	40	19.0242
161.44	53.8	40	106.48
161.44	53.85	40	148.107
161.44	53.9	40	140.654
161.44	53.95	40	24.522
161.44	54	40	10.118
161.44	54.05	40	47.149
161.44	54.1	40	38.713
161.44	54.15	40	55.7502
161.44	54.2	40	19.3395
161.44	54.25	40	82.5203
161.44	54.3	40	103.779
161.44	54.35	40	54.3954
161.44	54.4	40	26.5556
161.44	54.45	40	-35.018
161.44	54.5	40	3.85546
161.44	54.55	40	74.2074
161.44	54.6	40	7.5917
161.44	54.65	40	48.6504
161.44	54.7	40	19.8521
161.44	54.75	40	103.399
161.44	54.8	40	-25.132
161.44	54.85	40	11.0617
161.44	54.9	40	-6.49722
161.44	54.95	40	140.778
161.44	55	40	-2.87099
161.44	55.05	40	-2.835
161.44	55.1	40	71.1107
161.44	55.15	40	64.5821
161.44	55.2	40	20.3082
161.44	55.25	40	77.1274
161.44	55.3	40	50.6385
161.44	55.35	40	53.7523
161.44	55.4	40	81.9958
161.44	55.45	40	143.33
161.44	55.5	40	5.88856
161.44	55.55	40	131.323
161.44	55.6	40	11.0517
161.44	55.65	40	10.8235
161.44	55.7	40	3.28003
161.44	55.75	40	42.6818
161.44	55.8	40	-28.2706
161.44	55.85	40	70.9725
161.44	55.9	40	59.2499
161.44	55.95	40	21.0605
161.44	56	40	40.3624
161.44	56.05	40	101.191
161.44	56.1	40	24.9006
161.44	56.15	40	-23.85
161.44	56.2	40	78.104
161.44	56.25	40	34.3002
161.44	56.3	40	83.3854
161.44	56.35	40	67.7974
161.44	56.4	40	81.7907
161.44	56.45	40	113.068
161.44	56.5	40	134.525
161.44	56.55	40	20.4906
161.44	56.6	40	54.4984
161.44	56.65	40	165.429
161.44	56.7	40	-25.0255
161.44	56.75	40	53.0184
161.44	56.8	40	57.8619
161.44	56.85	40	27.0025
161.44	56.9	40	-20.8773
161.44	56.95	40	46.8353
161.44	57	40	144.485
161.44	57.05	40	30.4545
161.44	57.1	40	35.4237
161.44	57.15	40	67.7716
161.44	57.2	40	3.75392
161.44	57.25	40	58.3497
161.44	57.3	40	38.2662
161.44	57.35	40	7.60456
161.44	57.4	40	61.5745
161.44	57.45	40	81.8346
161.44	57.5	40	-20.8173
161.44	57.55	40	-4.6033
161.44	57.6	40	108.287
161.44	57.65	40	123.484
161.44	57.7	40	120.057
161.44	57.75	40	108.752
161.44	57.8	40	-86.2045
161.44	57.85	40	82.9425
161.44	57.9	40	-83.0744
161.44	57.95	40	-29.7935
161.44	58	40	-49.5708
161.44	58.05	40	53.2175
161.44	58.1	40	49.0842
161.44	58.15	40	68.6758
161.44	58.2	40	32.628
161.44	58.25	40	181.373
161.44	58.3	40	-68.2973
161.44	58.35	40	34.9302
161.44	58.4	40	17.2614
161.44	58.45	40	109.233
161.44	58.5	40	-44.413
161.44	58.55	40	33.5141
161.44	58.6	40	22.1011
161.44	58.65	40	46.727
161.44	58.7	40	44.1116
161.44	58.75	40	4.96153
161.44	58.8	40	87.1095
161.44	58.85	40	-26.6666
161.44	58.9	40	125.741
161.44	58.95	40	32.5627
161.44	59	40	60.3751
161.44	59.05	40	50.911
161.44	59.1	40	-11.5406
161.44	59.15	40	136.39
161.44	59.2	40	-63.8518
161.44	59.25	40	66.5222
161.44	59.3	40	11.3918
161.44	59.35	40	38.2649
161.44	59.4	40	20.2462
161.44	59.45	40	5.07829
161.44	59.5	40	33.4395
161.44	59.55	40	-6.56902
161.44	59.6	40	29.2787
161.44	59.65	40	46.7881
161.44	59.7	40	123.875
161.44	59.75	40	35.458
161.44	59.8	40	36.6621
161.44	59.85	40	31.6871
161.44	59.9	40	94.9199
161.44	59.95	40	51.6127
161.44	60	40	21.5291
161.44	60.05	40	62.9481
161.44	60.1	40	6.08332
161.44	60.15	40	43.3582
161.44	60.2	40	15.8549
161.44	60.25	40	55.6241
161.44	60.3	40	91.8622
161.44	60.35	40	30.3327
161.44	60.4	40	-119.587
161.44	60.45	40	39.3967
161.44	60.5	40	-62.3496
161.442	60.55	40	-30.2124
164.559	60.6	40	-10.04
167.675	60.65	40	124.436
170.792	60.7	40	-52.9754
173.909	60.75	40	-26.0389
177.025	60.8	40	143.148
180.142	60.85	40	17.154
183.258	60.9	40	48.916
186.375	60.95	40	-0.535548
189.491	61	40	19.354
192.608	61.05	40	72.074
195.725	61.1	40	115.718
197.306	61.15	40	68.9083
197.306	61.2	40	-21.8046
197.306	61.25	40	83.0429
197.306	61.3	40	-12.188
197.306	61.35	40	8.64047
197.306	61.4	40	-84.4568
197.306	61.45	40	72.4215
197.306	61.5	40	81.4632
197.306	61.55	40	-37.8104
197.306	61.6	40	50.7839
197.306	61.65	40	-74.6073
197.306	61.7	40	-17.699
197.306	61.75	40	32.4521
197.306	61.8	40	78.0384
197.306	61.85	40	129.825
197.306	61.9	40	44.27
197.306	61.95	40	19.0919
197.306	62	40	121.364
197.306	62.05	40	76.0675
197.306	62.1	40	25.9372
197.306	62.15	40	116.355
197.306	62.2	40	-18.6748
197.306	62.25	40	-12.9148
197.306	62.3	40	107.003
197.306	62.35	40	-22.8712
197.306	62.4	40	45.5306
197.306	62.45	40	20.2781
197.306	62.5	40	22.1358
197.306	62.55	40	-51.9622
197.306	62.6	40	49.8755
197.306	62.65	40	-5.32277
197.306	62.7	40	52.3706
197.306	62.75	40	24.9541
197.306	62.8	40	54.6705
197.306	62.85	40	58.526
197.306	62.9	40	-25.2023
197.306	62.95	40	76.215
197.306	63	40	5.52768
197.306	63.05	40	120.33
197.306	63.1	40	-43.1608
197.306	63.15	40	22.9976
197.306	63.2	40	6.7415
197.306	63.25	40	136.854
197.306	63.3	40	92.9505
197.306	63.35	40	-22.465
197.306	63.4	40	40.6013
197.306	63.45	40	76.7185
197.306	63.5	40	48.6481
197.306	63.55	40	82.9467
197.306	63.6	40	-15.8538
197.306	63.65	40	50.9148
197.306	63.7	40	24.3018
197.306	63.75	40	-84.9066
197.306	63.8	40	-17.8726
197.306	63.85	40	27.0733
197.306	63.9	40	-72.628
197.306	63.95	40	77.9611
197.306	64	40	35.4852
197.306	64.05	40	-30.2605
197.306	64.1	40	25.3054
197.306	64.15	40	115.641
197.306	64.2	40	0.0644279
197.306	64.25	40	46.0626
197.306	64.3	40	22.5206
197.306	64.35	40	41.8535
197.306	64.4	40	28.198
197.306	64.45	40	63.9183
197.306	64.5	40	2.57937
197.306	64.55	40	13.9961
197.306	64.6	40	-1.67394
197.306	64.65	40	-5.69874
197.306	64.7	40	-15.2356
197.306	64.75	40	56.0239
197.306	64.8	40	-77.4706
197.306	64.85	40	105.956
197.306	64.9	40	123.908
197.306	64.95	40	-86.5316
197.306	65	40	-23.1042
197.306	65.05	40	44.1582
197.306	65.1	40	154.671
197.306	65.15	40	113.839
197.306	65.2	40	121.07
197.306	65.25	40	28.1121
197.306	65.3	40	46.2612
197.306	65.35	40	109.852
197.306	65.4	40	73.9436
197.306	65.45	40	56.0742
197.306	65.5	40	16.8525
197.306	65.55	40	-34.5587
197.306	65.6	40	16.869
197.306	65.65	40	84.2353
197.306	65.7	40	-17.6218
197.306	65.75	40	69.93
197.306	65.8	40	-15.7241
197.306	65.85	40	66.0458
197.306	65.9	40	62.1422
197.306	65.95	40	10.6209
197.306	66	40	86.1852
197.306	66.05	40	-37.2657
197.306	66.1	40	24.4646
197.306	66.15	40	76.7608
197.306	66.2	40	127.253
197.306	66.25	40	5.31424
197.306	66.3	40	186.544
197.306	66.35	40	74.6989
197.306	66.4	40	93.1265
197.306	66.45	40	105.199
197.306	66.5	40	-45.2565
197.306	66.55	40	-32.8499
197.306	66.6	40	13.2459
197.306	66.65	40	122.867
197.306	66.7	40	27.2792
197.306	66.75	40	56.6779
197.306	66.8	40	139.416
197.306	66.85	40	103.131
197.306	66.9	40	89.793
197.306	66.95	40	15.7133
197.306	67	40	-53.2362
197.306	67.05	40	109.389
197.306	67.1	40	43.3867
197.306	67.15	40	-31.7858
197.306	67.2	40	24.4754
197.306	67.25	40	29.7293
197.306	67.3	40	90.025
197.306	67.35	40	97.767
197.306	67.4	40	61.5828
197.306	67.45	40	-24.2611
197.306	67.5	40	90.5605
197.466	67.55	40	124.683
201.46	67.6	40	-55.0688
205.455	67.65	40	58.7423
209.449	67.7	40	-80.4563
213.444	67.75	40	-2.81645
217.439	67.8	40	-18.9132
221.433	67.85	40	60.8965
225.428	67.9	40	36.1911
229.422	67.95	40	54.507
233.417	68	40	23.0197
237.412	68.05	40	91.4663
241.406	68.1	40	129.831
242.408	68.15	40	-5.80661
242.408	68.2	40	15.211
242.408	68.25	40	60.8943
242.408	68.3	40	30.5178
242.408	68.35	40	99.961
242.408	68.4	40	31.9903
242.408	68.45	40	80.9794
242.408	68.5	40	70.1398
242.408	68.55	40	97.9969
242.408	68.6	40	158.936
242.408	68.65	40	-63.8991
242.408	68.7	40	17.6257
242.408	68.75	40	-46.7437
242.408	68.8	40	129.905
242.408	68.85	40	-62.5173
242.408	68.9	40	60.3974
242.408	68.95	40	27.4958
242.408	69	40	7.38961
242.408	69.05	40	50.4222
242.408	69.1	40	38.7825
242.408	69.15	40	72.3059
242.408	69.2	40	48.0672
242.408	69.25	40	161.899
242.408	69.3	40	-19.0706
242.408	69.35	40	24.557
242.408	69.4	40	-5.32622
242.408	69.45	40	38.6848
242.408	69.5	40	57.2107
242.408	69.55	40	-71.453
242.408	69.6	40	0.90796
242.408	69.65	40	65.8076
242.408	69.7	40	-28.7189
242.408	69.75	40	23.4852
242.408	69.8	40	37.1519
242.408	69.85	40	9.16395
242.408	69.9	40	39.1154
242.408	69.95	40	-35.9348
242.408	70	40	44.2261
242.408	70.05	40	79.6382
242.408	70.1	40	4.03842
242.408	70.15	40	130.553
242.408	70.2	40	70.433
242.408	70.25	40	113.061
242.408	70.3	40	22.95
242.408	70.35	40	50.9055
242.408	70.4	40	-54.5403
242.408	70.45	40	-6.90105
242.408	70.5	40	-61.5039
242.408	70.55	40	131.673
242.408	70.6	40	61.8457
242.408	70.65	40	9.578
242.408	70.7	40	9.58096
242.408	70.75	40	8.92569
242.408	70.8	40	19.0316
242.408	70.85	40	72.1309
242.408	70.9	40	127.046
242.408	70.95	40	104.231
242.408	71	40	-66.8594
242.408	71.05	40	54.6361
242.408	71.1	40	94.7842
242.408	71.15	40	50.0497
242.408	71.2	40	212.639
242.408	71.25	40	164.793
242.408	71.3	40	220.854
242.408	71.35	40	65.9169
242.408	71.4	40	39.2006
242.408	71.45	40	-45.245
242.408	71.5	40	53.6677
242.408	71.55	40	74.8744
242.408	71.6	40	10.1825
242.408	71.65	40	-52.7081
242.408	71.7	40	120.008
242.408	71.75	40	144.53
242.408	71.8	40	-25.0517
242.408	71.85	40	-30.6907
242.408	71.9	40	39.4861
242.408	71.95	40	9.52455
242.408	72	40	27.3249
242.408	72.05	40	49.0387
242.408	72.1	40	147.925
242.408	72.15	40	124.541
242.408	72.2	40	-54.8335
242.408	72.25	40	62.6186
242.408	72.3	40	-55.3174
242.408	72.35	40	-12.7934
242.408	72.4	40	73.7241
242.408	72.45	40	47.802
242.408	72.5	40	-15.4301
242.408	72.55	40	141.252
242.408	72.6	40	103.216
242.408	72.65	40	98.1284
242.408	72.7	40	109.536
242.408	72.75	40	48.0196
242.408	72.8	40	14.3196
242.408	72.85	40	-22.9178
242.408	72.9	40	-44.7483
242.408	72.95	40	-30.7787
242.408	73	40	36.1153
242.408	73.05	40	14.4852
242.408	73.1	40	72.3599
242.408	73.15	40	46.015
242.408	73.2	40	75.43
242.408	73.25	40	4.52498
242.408	73.3	40	-111.257
242.408	73.35	40	-23.7786
242.408	73.4	40	-16.0263
242.408	73.45	40	-47.4656
242.408	73.5	40	3.95282
242.408	73.55	40	133.225
242.408	73.6	40	28.8369
242.408	73.65	40	111.166
242.408	73.7	40	-39.1569
242.408	73.75	40	-49.5289
242.408	73.8	40	33.3576
242.408	73.85	40	-42.8209
242.408	73.9	40	46.2992
242.408	73.95	40	37.6121
242.408	74	40	52.306
242.408	74.05	40	25.2938
242.408	74.1	40	44.3131
242.408	74.15	40	31.4041
242.408	74.2	40	79.5696
242.408	74.25	40	-48.1041
242.408	74.3	40	-16.8097
242.408	74.35	40	-40.6565
242.408	74.4	40	44.9615
242.408	74.45	40	96.8842
242.408	74.5	40	61.7163
242.408	74.55	40	19.0963
242.408	74.6	40	13.5215
242.408	74.65	40	62.2276
242.408	74.7	40	21.8917
242.408	74.75	40	92.5029
242.408	74.8	40	1.43463
242.408	74.85	40	80.3234
242.408	74.9	40	22.0635
242.408	74.95	40	68.7318
242.408	75	40	112.689
242.408	75.05	40	-35.5715
242.408	75.1	40	38.5536
242.408	75.15	40	33.0765
242.408	75.2	40	13.7761
242.408	75.25	40	70.5948
242.408	75.3	40	-45.5349
242.408	75.35	40	34.6531
242.408	75.4	40	156.013
242.408	75.45	40	-12.4076
242.408	75.5	40	43.6009
242.408	75.55	40	62.474
242.408	75.6	40	36.5723
242.408	75.65	40	99.6211
242.408	75.7	40	-19.5377
242.408	75.75	40	18.9294
242.408	75.8	40	107.408
242.408	75.85	40	54.4988
242.408	75.9	40	28.0123
242.408	75.95	40	88.5307
242.408	76	40	146.671
242.408	76.05	40	-49.5399
242.408	76.1	40	78.2447
242.408	76.15	40	42.1355
242.408	76.2	40	-6.43739
242.408	76.25	40	59.0457
242.408	76.3	40	44.4423
242.408	76.35	40	118.358
242.408	76.4	40	-26.7805
242.408	76.45	40	20.5606
242.408	76.5	40	5.87289
242.408	76.55	40	-75.9818
242.408	76.6	40	103.602
242.408	76.65	40	-23.6899
242.408	76.7	40	7.08986
242.408	76.75	40	-50.9788
242.408	76.8	40	71.6171
242.408	76.85	40	95.7833
242.408	76.9	40	10.3017
242.408	76.95	40	60.7065
242.408	77	40	71.1125
242.408	77.05	40	56.1626
242.408	77.1	40	-35.6314
242.408	77.15	40	74.3094
242.408	77.2	40	93.281
242.408	77.25	40	-67.4957
242.408	77.3	40	0.280298
242.408	77.35	40	97.8888
242.408	77.4	40	118.644
242.408	77.45	40	72.6447
242.408	77.5	40	49.6374
242.408	77.55	40	10.835
242.408	77.6	40	-5.61253
242.408	77.65	40	70.421
242.408	77.7	40	-135.051
242.408	77.75	40	8.45774
242.408	77.8	40	16.0764
242.408	77.85	40	53.0639
242.408	77.9	40	26.7579
242.408	77.95	40	17.1292
242.408	78	40	-2.42453
242.408	78.05	40	-11.9626
242.408	78.1	40	-13.7225
242.408	78.15	40	57.1884
242.408	78.2	40	100.47
242.408	78.25	40	147.345
242.408	78.3	40	61.4963
242.408	78.35	40	70.5784
242.408	78.4	40	-1.60978
242.408	78.45	40	90.7204
242.408	78.5	40	29.65
242.408	78.55	40	20.2548
242.408	78.6	40	7.70218
242.408	78.65	40	39.9157
242.408	78.7	40	-101.981
242.408	78.75	40	-32.9468
242.408	78.8	40	94.8799
242.408	78.85	40	89.0156
242.408	78.9	40	149.518
242.408	78.95	40	28.7238
242.408	79	40	40.8534
242.408	79.05	40	-36.9609
242.408	79.1	40	44.0601
242.408	79.15	40	99.9126
242.408	79.2	40	176.726
242.408	79.25	40	104.859
242.408	79.3	40	71.3376
242.408	79.35	40	33.0944
242.408	79.4	40	-17.2792
242.408	79.45	40	167.841
242.408	79.5	40	15.2015
242.408	79.55	40	-36.7835
242.408	79.6	40	-19.5824
242.408	79.65	40	73.2944
242.408	79.7	40	8.4304
242.408	79.75	40	70.703
242.408	79.8	40	44.4545
242.408	79.85	40	-51.5198
242.408	79.9	40	58.0698
242.408	79.95	40	73.3163
242.408	80	40	56.8617
242.408	80.05	40	-62.9035
242.408	80.1	40	-41.9107
242.408	80.15	40	67.1101
242.408	80.2	40	1.4868
242.408	80.25	40	-14.6263
245.031	80.3	40	3.04412
248.207	80.35	40	173.322
251.382	80.4	40	-45.7063
254.558	80.45	40	31.8054
257.733	80.5	40	43.8411
260.909	80.55	40	110.437
264.084	80.6	40	87.317
267.259	80.65	40	126.737
270.435	80.7	40	26.4841
273.61	80.75	40	36.4947
276.786	80.8	40	127.944
278.564	80.85	40	-6.68867
278.564	80.9	40	-21.8352
278.564	80.95	40	136.976
278.564	81	40	102.963
278.564	81.05	40	-74.8639
278.564	81.1	40	-17.1954
278.564	81.15	40	26.009
278.564	81.2	40	-3.53485
278.564	81.25	40	-15.7431
278.564	81.3	40	123.541
278.564	81.35	40	19.0606
278.564	81.4	40	-49.169
278.564	81.45	40	-6.93446
278.564	81.5	40	44.7321
278.564	81.55	40	-73.9196
278.564	81.6	40	-16.5147
278.564	81.65	40	104.101
278.564	81.7	40	43.2519
278.564	81.75	40	87.4518
278.564	81.8	40	-75.8273
278.564	81.85	40	46.7069
278.564	81.9	40	24.347
278.564	81.95	40	102.303
278.564	82	40	37.2352
278.564	82.05	40	30.5686
278.564	82.1	40	45.1472
278.564	82.15	40	102.321
278.564	82.2	40	167.652
278.564	82.25	40	146.608
278.564	82.3	40	123.431
278.564	82.35	40	40.9062
278.564	82.4	40	91.3074
278.564	82.45	40	-131.749
278.564	82.5	40	1.87699
278.564	82.55	40	117.728
278.564	82.6	40	40.5817
278.564	82.65	40	65.5554
278.564	82.7	40	7.87781
278.564	82.75	40	93.0544
278.564	82.8	40	21.9682
278.564	82.85	40	59.9756
278.564	82.9	40	55.9851
278.564	82.95	40	90.1321
278.564	83	40	-67.1187
278.564	83.05	40	22.6103
278.564	83.1	40	22.4268
278.564	83.15	40	71.9868
278.564	83.2	40	32.9644
278.564	83.25	40	66.4698
278.564	83.3	40	36.874
278.564	83.35	40	93.8245
278.564	83.4	40	71.1626
278.564	83.45	40	75.9113
278.564	83.5	40	-0.693675
278.564	83.55	40	8.82353
278.564	83.6	40	-7.45688
278.564	83.65	40	-8.9739
278.564	83.7	40	-4.97194
278.564	83.75	40	71.0749
278.564	83.8	40	99.8257
278.564	83.85	40	14.2494
278.564	83.9	40	117.124
278.564	83.95	40	-42.6395
278.564	84	40	124.642
278.564	84.05	40	15.8534
278.564	84.1	40	105.625
278.564	84.15	40	-56.0589
278.564	84.2	40	-40.1442
278.564	84.25	40	29.5839
278.564	84.3	40	90.3025
278.564	84.35	40	0.161731
278.564	84.4	40	-63.1891
278.564	84.45	40	128.347
278.564	84.5	40	23.9404
278.564	84.55	40	46.046
278.564	84.6	40	116.076
278.564	84.65	40	50.4299
278.564	84.7	40	-44.8149
278.564	84.75	40	38.1097
278.564	84.8	40	-13.625
278.564	84.85	40	-29.5245
278.564	84.9	40	209.71
278.564	84.95	40	41.9337
278.564	85	40	52.2869
278.564	85.05	40	-50.5132
278.564	85.1	40	-92.68
278.564	85.15	40	9.69982
278.564	85.2	40	34.893
278.564	85.25	40	-7.48536
278.564	85.3	40	8.81226
278.564	85.35	40	105.877
278.564	85.4	40	24.1005
278.564	85.45	40	55.0003
278.564	85.5	40	77.2358
278.564	85.55	40	83.8614
278.564	85.6	40	27.7207
278.564	85.65	40	-82.9485
278.564	85.7	40	33.1439
278.564	85.75	40	44.8158
278.564	85.8	40	21.0681
278.564	85.85	40	30.8733
278.564	85.9	40	-49.5178
278.564	85.95	40	36.17
278.564	86	40	31.2346
278.564	86.05	40	-8.69688
278.564	86.1	40	33.6065
278.564	86.15	40	-51.9342
278.564	86.2	40	-32.7532
278.564	86.25	40	28.9056
278.564	86.3	40	116.745
278.564	86.35	40	-0.879614
278.564	86.4	40	21.22
278.564	86.45	40	58.0416
278.564	86.5	40	147.09
278.564	86.55	40	10.4862
278.564	86.6	40	-6.6436
278.564	86.65	40	19.4757
278.564	86.7	40	28.8086
278.564	86.75	40	47.0677
278.564	86.8	40	56.0327
278.564	86.85	40	-19.4302
278.564	86.9	40	40.8383
278.564	86.95	40	29.4193
278.564	87	40	86.9218
278.564	87.05	40	117.707
278.564	87.1	40	95.4235
278.564	87.15	40	90.1779
280.909	87.2	40	-49.822
283.755	87.25	40	53.6956
286.602	87.3	40	61.2217
289.449	87.35	40	41.1849
292.295	87.4	40	-10.6452
295.142	87.45	40	71.0617
297.989	87.5	40	-23.7359
300.835	87.55	40	123.508
303.682	87.6	40	146.501
306.529	87.65	40	82.1328
309.375	87.7	40	72.0077
312.222	87.75	40	28.7679
315.069	87.8	40	-24.7406
317.915	87.85	40	95.96
318.497	87.9	40	33.8817
318.497	87.95	40	78.2973
318.497	88	40	53.242
318.497	88.05	40	-52.4975
318.497	88.1	40	7.43649
318.497	88.15	40	35.275
318.497	88.2	40	-9.12126
318.497	88.25	40	125.945
318.497	88.3	40	-10.0261
318.497	88.35	40	130.183
318.497	88.4	40	65.0489
318.497	88.45	40	19.2958
318.497	88.5	40	63.9727
318.497	88.55	40	7.59807
318.497	88.6	40	25.8224
318.497	88.65	40	-31.7756
318.497	88.7	40	90.5772
318.497	88.75	40	51.9822
318.497	88.8	40	84.4822
318.497	88.85	40	-67.7699
318.497	88.9	40	24.8046
318.497	88.95	40	-57.711
318.497	89	40	55.2756
318.497	89.05	40	61.2048
318.497	89.1	40	-86.7623
318.497	89.15	40	-10.8603
318.497	89.2	40	32.0484
318.497	89.25	40	51.2405
318.497	89.3	40	16.3559
318.497	89.35	40	22.2272
318.497	89.4	40	-13.6586
318.497	89.45	40	143.801
318.497	89.5	40	-42.1038
318.497	89.55	40	-31.4766
318.497	89.6	40	80.9878
318.497	89.65	40	-14.3719
318.497	89.7	40	132.166
318.497	89.75	40	38.2977
318.497	89.8	40	116.789
318.497	89.85	40	37.0806
318.497	89.9	40	106.073
318.497	89.95	40	130.343
318.497	90	40	66.571
318.497	90.05	40	35.7785
318.497	90.1	40	151.299
318.497	90.15	40	25.3729
318.497	90.2	40	-5.89561
318.497	90.25	40	126.389
318.497	90.3	40	159.079
318.497	90.35	40	2.05992
318.497	90.4	40	-27.6397
318.497	90.45	40	131.208
318.497	90.5	40	36.4957
318.497	90.55	40	64.012
318.497	90.6	40	-8.35924
318.497	90.65	40	-78.4579
318.497	90.7	40	114.008
318.497	90.75	40	-81.6971
318.497	90.8	40	-42.061
318.497	90.85	40	100.055
318.497	90.9	40	89.3346
318.497	90.95	40	158.907
318.497	91	40	73.3754
318.497	91.05	40	-0.819668
318.497	91.1	40	45.7614
318.497	91.15	40	73.5597
318.497	91.2	40	137.602
318.497	91.25	40	5.19146
318.497	91.3	40	77.0903
318.497	91.35	40	43.2662
318.497	91.4	40	-23.2991
318.497	91.45	40	-40.8722
318.497	91.5	40	65.4012
318.497	91.55	40	53.1043
318.497	91.6	40	178.261
318.497	91.65	40	87.0862
318.497	91.7	40	-84.9418
318.497	91.75	40	78.84
318.497	91.8	40	98.5771
318.497	91.85	40	-13.3522
318.497	91.9	40	50.0039
318.497	91.95	40	-4.03262
318.497	92	40	112.354
318.497	92.05	40	47.5735
318.497	92.1	40	-14.121
318.497	92.15	40	-27.4456
318.497	92.2	40	-4.60278
318.497	92.25	40	31.4691
318.497	92.3	40	68.2336
318.497	92.35	40	87.8823
318.497	92.4	40	183.032
318.497	92.45	40	61.0793
318.497	92.5	40	0.324254
318.497	92.55	40	40.0975
318.497	92.6	40	14.0426
318.497	92.65	40	75.3558
318.497	92.7	40	68.7094
318.497	92.75	40	80.8051
318.497	92.8	40	54.7478
318.497	92.85	40	12.4269
318.497	92.9	40	86.4133
318.497	92.95	40	36.5009
318.497	93	40	33.4257
318.497	93.05	40	-28.2018
318.497	93.1	40	45.4883
318.497	93.15	40	-31.5196
318.497	93.2	40	122.44
318.497	93.25	40	-111.691
318.497	93.3	40	29.3457
318.497	93.35	40	106.52
318.497	93.4	40	-111.088
318.497	93.45	40	143.462
318.497	93.5	40	88.3536
318.497	93.55	40	121.63
318.497	93.6	40	-66.4138
318.497	93.65	40	32.1402
318.497	93.7	40	-42.6736
318.497	93.75	40	57.0174
318.497	93.8	40	-15.3451
318.497	93.85	40	10.3154
318.497	93.9	40	16.5727
318.497	93.95	40	124.639
318.497	94	40	63.6383
318.497	94.05	40	124.366
318.497	94.1	40	90.9612
318.497	94.15	40	112.994
318.497	94.2	40	72.6879
318.497	94.25	40	-58.1651
318.497	94.3	40	30.9529
318.497	94.35	40	-31.5098
318.497	94.4	40	14.2826
318.497	94.45	40	125.88
318.497	94.5	40	-25.5638
318.497	94.55	40	50.8198
318.497	94.6	40	-28.1969
318.497	94.65	40	80.0188
318.497	94.7	40	47.8457
318.497	94.75	40	11.1009
318.497	94.8	40	-131.684
318.497	94.85	40	28.3832
318.497	94.9	40	79.9273
318.497	94.95	40	-8.47486
318.497	95	40	102.134
318.497	95.05	40	54.6647
318.497	95.1	40	37.4173
318.497	95.15	40	82.4998
318.497	95.2	40	45.4254
318.497	95.25	40	105.828
318.497	95.3	40	-79.6007
318.497	95.35	40	3.91489
318.497	95.4	40	88.5021
318.497	95.45	40	62.7431
318.497	95.5	40	70.8128
318.497	95.55	40	-73.8429
318.497	95.6	40	123.566
318.497	95.65	40	66.5171
318.497	95.7	40	135.569
318.497	95.75	40	22.6316
318.497	95.8	40	-50.5207
318.497	95.85	40	40.494
318.497	95.9	40	11.899
318.497	95.95	40	66.2183
318.497	96	40	40.2262
318.497	96.05	40	52.885
318.497	96.1	40	-15.0935
318.497	96.15	40	9.87265
318.497	96.2	40	58.3827
318.497	96.25	40	-21.4951
318.497	96.3	40	-16.9582
318.497	96.35	40	-21.4878
318.497	96.4	40	38.5839
318.497	96.45	40	49.1381
318.497	96.5	40	-22.014
318.497	96.55	40	135.822
318.497	96.6	40	117.975
318.497	96.65	40	9.10972
318.497	96.7	40	-0.256514
318.497	96.75	40	18.3456
318.497	96.8	40	47.0622
318.497	96.85	40	20.4241
318.497	96.9	40	72.8473
318.497	96.95	40	51.4201
318.497	97	40	-27.4627
318.497	97.05	40	26.6857
318.497	97.1	40	-45.9727
318.497	97.15	40	106.549
318.497	97.2	40	42.315
318.497	97.25	40	134.414
318.497	97.3	40	70.4748
318.497	97.35	40	93.3448
318.497	97.4	40	-13.3779
318.497	97.45	40	-29.3822
318.497	97.5	40	52.6151
318.497	97.55	40	103.419
318.497	97.6	40	-64.2958
318.497	97.65	40	6.69097
318.497	97.7	40	-58.5871
318.497	97.75	40	20.0376
318.497	97.8	40	123.964
318.497	97.85	40	-3.47842
318.497	97.9	40	47.7715
318.497	97.95	40	23.6829
318.497	98	40	-59.9243
318.497	98.05	40	10.954
318.497	98.1	40	177.269
318.497	98.15	40	143.42
318.497	98.2	40	-22.9887
318.497	98.25	40	101.796
318.497	98.3	40	35.0227
318.497	98.35	40	33.0193
318.497	98.4	40	24.0929
318.497	98.45	40	120.401
318.497	98.5	40	36.4163
318.497	98.55	40	68.5045
318.497	98.6	40	-116.791
318.497	98.65	40	66.8815
318.497	98.7	40	109.936
318.497	98.75	40	151.407
318.497	98.8	40	-35.4041
318.497	98.85	40	-31.7242
318.497	98.9	40	-60.8589
318.497	98.95	40	61.1149
318.497	99	40	61.1483
318.497	99.05	40	72.9482
318.497	99.1	40	-22.6394
318.497	99.15	40	141.557
318.497	99.2	40	-83.5487
318.497	99.25	40	85.6818
319.81	99.3	40	46.2365
323.531	99.35	40	-35.4914
327.251	99.4	40	-3.77242
330.971	99.45	40	68.7713
334.692	99.5	40	134.223
338.412	99.55	40	4.42215
342.132	99.6	40	23.0741
345.853	99.65	40	119.472
349.573	99.7	40	109.565
353.293	99.75	40	-90.936
357.013	99.8	40	25.9241
360.734	99.85	40	-34.7608
361.548	99.9	40	50.8524
[truncated: 26,406 more rows]

## Sheet: C
20 Lk/Min simulation T-test Y values	20 Lk/Min simulation T-Test time points	20 Lk/Min simulation Simulated data without noise (0.005 s per point time scaling)	20 Lk/Min simulation Simulated data (0.005 s per point time scaling)
6.66324	0	0	69.1855
6.66324	0.05	0	7.2256
6.66324	0.1	0	9.42669
6.66324	0.15	0	-101.424
6.66324	0.2	0	-0.62568
6.66324	0.25	0	-18.6693
6.66324	0.3	0	23.4337
6.66324	0.35	0	27.3243
6.66324	0.4	0	-64.7046
6.66324	0.45	0	24.4368
6.66324	0.5	0	-12.184
6.66324	0.55	0	53.4291
8.64337	0.6	0	88.6544
11.5181	0.65	0	-108.718
14.3929	0.7	0	-44.8104
17.2677	0.75	0	-85.7951
20.1424	0.8	0	19.0586
23.0172	0.85	0	46.4497
25.8919	0.9	0	-6.29867
28.7667	0.95	0	120.684
31.6415	1	0	98.6789
34.5162	1.05	0	26.5192
37.391	1.1	0	-63.1369
39.2078	1.15	0	-1.58421
39.2078	1.2	0	-31.9162
39.2078	1.25	0	-11.488
39.2078	1.3	0	24.3876
39.2078	1.35	0	48.9171
39.2078	1.4	0	86.7273
39.2078	1.45	0	-126.505
39.2078	1.5	0	-102.494
39.2078	1.55	0	-47.2416
39.2078	1.6	0	-82.3939
39.2078	1.65	0	-76.2508
39.2078	1.7	0	88.6208
39.2078	1.75	0	-75.2369
39.2078	1.8	0	27.52
39.2078	1.85	0	61.9653
39.2078	1.9	0	62.4991
39.2078	1.95	0	-14.4067
39.2078	2	0	78.1583
39.2078	2.05	0	91.6271
39.2078	2.1	0	109.403
39.2078	2.15	0	53.8589
39.2078	2.2	0	71.92
39.2078	2.25	0	-112.293
39.2078	2.3	0	-71.0512
39.2078	2.35	0	-80.1787
39.2078	2.4	0	-22.4415
39.2078	2.45	0	25.3733
39.2078	2.5	0	24.3242
39.2078	2.55	0	53.8336
39.2078	2.6	0	-83.06
39.2078	2.65	0	-11.5418
39.2078	2.7	0	21.3264
39.2078	2.75	0	60.293
39.2078	2.8	0	20.339
39.2078	2.85	0	-61.1959
39.2078	2.9	0	-10.7229
39.2078	2.95	0	14.6624
39.2078	3	0	66.7547
39.2078	3.05	0	67.2863
39.2078	3.1	0	35.9651
39.2078	3.15	0	-77.4572
39.2078	3.2	0	-87.5994
39.2078	3.25	0	-35.6287
40.0935	3.3	0	-52.5439
43.9966	3.35	0	-34.5045
47.8998	3.4	0	60.7796
51.803	3.45	0	43.2768
55.7061	3.5	0	19.135
59.6093	3.55	0	-3.06606
63.5124	3.6	0	73.1291
67.4156	3.65	0	-2.17896
71.3187	3.7	0	10.1505
75.2219	3.75	0	-74.2738
79.1251	3.8	0	-60.8291
83.0282	3.85	0	66.5896
84.7181	3.9	0	50.0395
84.7181	3.95	0	97.7946
84.7181	4	0	36.6499
84.7181	4.05	0	-36.6608
84.7181	4.1	0	-25.3291
84.7181	4.15	0	-0.291852
84.7181	4.2	0	64.674
84.7181	4.25	0	23.2716
84.7181	4.3	0	63.3917
84.7181	4.35	0	27.1836
84.7181	4.4	0	78.9539
84.7181	4.45	0	29.1842
84.7181	4.5	0	10.7258
84.7181	4.55	0	-63.4288
84.7181	4.6	0	-30.7686
84.7181	4.65	0	57.2215
84.7181	4.7	0	59.5681
84.7181	4.75	0	60.734
84.7181	4.8	0	41.044
84.7181	4.85	0	-83.1226
84.7181	4.9	0	18.2458
84.7181	4.95	0	52.7888
84.7181	5	0	-57.8532
84.7181	5.05	0	19.3324
84.7181	5.1	0	-78.6493
84.7181	5.15	0	94.9497
84.7181	5.2	0	-99.5015
84.7181	5.25	0	9.68116
84.7181	5.3	0	65.3106
84.7181	5.35	0	-29.4363
84.7181	5.4	0	9.58969
84.7181	5.45	0	25.2339
84.7181	5.5	0	-25.3336
84.7181	5.55	0	0.180789
84.7181	5.6	0	-24.4901
84.7181	5.65	0	51.8017
84.7181	5.7	0	17.1323
84.7181	5.75	0	99.8741
84.7181	5.8	0	-65.7581
84.7181	5.85	0	-28.9059
84.7181	5.9	0	-5.05679
84.7181	5.95	0	66.338
84.7181	6	0	100.597
84.7181	6.05	0	-37.6952
84.7181	6.1	0	-49.7096
84.7181	6.15	0	-18.6242
84.7181	6.2	0	-60.9591
84.7181	6.25	0	-66.007
84.7181	6.3	0	-75.6535
84.7181	6.35	0	-10.5119
84.7181	6.4	0	-42.564
84.7181	6.45	0	84.1166
84.7181	6.5	0	-1.32107
84.7181	6.55	0	-4.4875
91.2136	6.6	0	-50.4449
100.974	6.65	0	51.6158
110.734	6.7	0	-58.567
120.495	6.75	0	34.1627
130.255	6.8	0	36.1485
140.015	6.85	0	60.552
149.776	6.9	0	60.307
159.536	6.95	0	-99.1496
169.297	7	0	-45.7633
179.057	7.05	0	39.204
188.817	7.1	0	-40.3541
198.578	7.15	0	46.3111
199.615	7.2	0	-10.2784
199.615	7.25	0	-158.99
199.615	7.3	0	52.9168
199.615	7.35	0	-30.923
199.615	7.4	0	75.6656
199.615	7.45	0	-120.045
199.615	7.5	0	29.4607
199.615	7.55	0	8.22263
199.615	7.6	0	16.8023
199.615	7.65	0	22.52
199.615	7.7	0	-39.03
199.615	7.75	0	74.1778
199.615	7.8	0	65.7394
199.615	7.85	0	109.836
199.615	7.9	0	-90.1572
199.615	7.95	0	82.4578
199.615	8	0	4.5479
199.615	8.05	0	-21.0548
199.615	8.1	0	33.2924
199.615	8.15	0	-11.1632
199.615	8.2	0	-9.18306
199.615	8.25	0	21.6418
199.615	8.3	0	-87.2518
199.615	8.35	0	119.364
199.615	8.4	0	106.31
199.615	8.45	0	73.3639
199.615	8.5	0	-39.8702
199.615	8.55	0	-75.8917
199.615	8.6	0	-66.4342
199.615	8.65	0	49.9848
199.615	8.7	0	77.1706
199.615	8.75	0	-14.1349
199.615	8.8	0	-23.4541
199.615	8.85	0	13.6168
199.615	8.9	0	16.5357
199.615	8.95	0	39.5105
199.615	9	0	-61.4042
199.615	9.05	0	88.8677
199.615	9.1	0	-95.6878
199.615	9.15	0	15.3705
199.615	9.2	0	-13.8208
199.615	9.25	0	-68.4492
199.615	9.3	0	104.706
199.615	9.35	0	34.4656
199.615	9.4	0	-11.7925
199.615	9.45	0	13.7062
199.615	9.5	40	51.3224
199.615	9.55	40	-62.3328
199.615	9.6	40	29.1783
199.615	9.65	40	-93.0839
199.615	9.7	40	67.1295
199.615	9.75	40	73.1652
199.615	9.8	40	60.9014
199.615	9.85	40	132.905
199.615	9.9	40	86.5521
199.615	9.95	40	14.9862
199.615	10	40	50.9415
199.615	10.05	40	-4.89359
199.615	10.1	40	41.2993
199.615	10.15	40	10.8974
199.615	10.2	40	-14.6645
199.615	10.25	40	76.8565
199.615	10.3	40	150.222
199.615	10.35	40	5.35887
199.615	10.4	40	142.998
199.615	10.45	40	159.962
199.951	10.5	40	108.138
203.365	10.55	40	49.5538
206.78	10.6	40	-34.0192
210.194	10.65	40	-44.583
213.608	10.7	40	109.715
217.022	10.75	40	-22.7452
220.436	10.8	40	-92.7128
223.85	10.85	40	0.509949
227.264	10.9	40	15.3862
230.678	10.95	40	39.2427
234.093	11	40	31.4975
237.507	11.05	40	15.8447
239.109	11.1	40	-18.5562
239.109	11.15	40	-28.25
239.109	11.2	40	25.6476
239.109	11.25	40	2.58305
239.109	11.3	40	-5.32407
239.109	11.35	40	13.6435
239.109	11.4	40	175.273
239.109	11.45	40	164.424
239.109	11.5	40	46.6862
239.109	11.55	40	144.247
239.109	11.6	40	23.1949
239.109	11.65	40	42.8918
239.109	11.7	40	22.0717
239.109	11.75	40	-27.1317
239.109	11.8	40	103.99
239.109	11.85	40	32.4519
239.109	11.9	40	-44.215
239.109	11.95	40	77.7179
239.109	12	40	106.505
239.109	12.05	40	65.9896
239.109	12.1	40	33.6511
239.109	12.15	40	75.4583
239.109	12.2	40	-31.366
239.109	12.25	40	153.845
239.109	12.3	40	31.4319
239.109	12.35	40	-116.545
239.109	12.4	40	-66.2748
239.109	12.45	40	54.246
239.109	12.5	40	65.9105
239.109	12.55	40	-36.0433
239.109	12.6	40	114.435
239.109	12.65	40	-61.0478
239.109	12.7	40	37.4665
239.109	12.75	40	48.9804
239.109	12.8	40	118.843
239.109	12.85	40	-8.3708
239.109	12.9	40	20.9854
239.109	12.95	40	98.9213
239.109	13	40	-4.59108
239.109	13.05	40	17.5743
239.109	13.1	40	91.8963
239.109	13.15	40	47.3452
239.109	13.2	40	4.67877
239.109	13.25	40	18.0877
239.109	13.3	40	60.3072
241.087	13.35	40	21.3433
243.909	13.4	40	118.753
246.732	13.45	40	-6.10573
249.554	13.5	40	48.2962
252.376	13.55	40	55.8174
255.199	13.6	40	8.41711
258.021	13.65	40	85.9078
260.844	13.7	40	67.7831
263.666	13.75	40	135.668
266.488	13.8	40	39.6596
269.311	13.85	40	46.2291
272.133	13.9	40	41.7635
274.955	13.95	40	4.37367
277.778	14	40	-24.2301
278.89	14.05	40	26.6344
278.89	14.1	40	96.8392
278.89	14.15	40	3.11289
278.89	14.2	40	114.013
278.89	14.25	40	-44.9084
278.89	14.3	40	18.6615
278.89	14.35	40	132.054
278.89	14.4	40	61.4047
278.89	14.45	40	-11.9687
278.89	14.5	40	36.4874
278.89	14.55	40	19.1471
278.89	14.6	40	31.2185
278.89	14.65	40	70.4991
278.89	14.7	40	97.343
278.89	14.75	40	14.9458
278.89	14.8	40	-75.9903
278.89	14.85	40	51.9415
278.89	14.9	40	95.1032
278.89	14.95	40	-4.88261
278.89	15	40	36.2427
278.89	15.05	40	-58.7065
278.89	15.1	40	-12.5002
278.89	15.15	40	119.403
278.89	15.2	40	49.6843
278.89	15.25	40	138.177
278.89	15.3	40	23.6756
278.89	15.35	40	-28.0705
278.89	15.4	40	66.143
278.89	15.45	40	150.138
278.89	15.5	40	74.966
278.89	15.55	40	-40.5765
278.89	15.6	40	35.6965
278.89	15.65	40	98.8858
278.89	15.7	40	112.648
278.89	15.75	40	18.3847
278.89	15.8	40	95.4368
278.89	15.85	40	88.2685
278.89	15.9	40	86.8281
278.89	15.95	40	13.8091
278.89	16	40	28.9459
278.89	16.05	40	-61.7512
278.89	16.1	40	27.9177
278.89	16.15	40	52.7581
278.89	16.2	40	65.7361
278.89	16.25	40	75.935
278.89	16.3	40	23.9185
278.89	16.35	40	-13.2721
278.89	16.4	40	83.7317
278.89	16.45	40	32.3569
278.89	16.5	40	-18.0901
278.89	16.55	40	91.2956
278.89	16.6	40	8.1528
278.89	16.65	40	-40.6815
278.89	16.7	40	26.136
278.89	16.75	40	37.5443
278.89	16.8	40	50.44
278.89	16.85	40	117.747
278.89	16.9	40	62.2252
278.89	16.95	40	84.3951
278.89	17	40	78.5871
278.89	17.05	40	45.174
278.89	17.1	40	-16.5962
278.89	17.15	40	139.028
278.89	17.2	40	165.027
278.89	17.25	40	19.3845
278.89	17.3	40	122.352
278.89	17.35	40	-12.791
278.89	17.4	40	-57.54
278.89	17.45	40	-73.4155
278.89	17.5	40	134.762
278.89	17.55	40	93.857
278.89	17.6	40	75.453
278.89	17.65	40	-67.4416
278.89	17.7	40	-9.47915
278.89	17.75	40	60.6451
278.89	17.8	40	5.13182
278.89	17.85	40	79.4415
278.89	17.9	40	-0.658696
278.89	17.95	40	-69.0658
278.89	18	40	34.2839
278.89	18.05	40	62.6469
278.89	18.1	40	-47.5681
278.89	18.15	40	-21.4307
278.89	18.2	40	93.5108
278.89	18.25	40	-47.8222
278.89	18.3	40	79.348
278.89	18.35	40	10.1139
278.89	18.4	40	89.2568
278.89	18.45	40	14.2246
278.89	18.5	40	50.542
278.89	18.55	40	72.4159
278.89	18.6	40	-17.8835
278.89	18.65	40	53.268
278.89	18.7	40	25.4454
278.89	18.75	40	129.912
278.89	18.8	40	98.9303
278.89	18.85	40	69.8646
278.89	18.9	40	11.4559
278.89	18.95	40	52.9056
278.89	19	40	-10.9765
278.89	19.05	40	30.9963
278.89	19.1	40	-24.0509
278.89	19.15	40	24.9123
278.89	19.2	40	16.6647
278.89	19.25	40	84.9906
278.89	19.3	40	-42.2145
278.89	19.35	40	49.3538
278.89	19.4	40	187.13
278.89	19.45	40	99.2241
278.89	19.5	40	31.6383
278.89	19.55	40	41.3699
278.89	19.6	40	-13.0082
278.89	19.65	40	6.20968
278.89	19.7	40	67.0199
278.89	19.75	40	113.618
278.89	19.8	40	81.0636
278.89	19.85	40	36.2335
278.89	19.9	40	-4.01635
278.89	19.95	40	105.424
281.682	20	40	-18.3771
284.627	20.05	40	-21.4491
287.572	20.1	40	43.9516
290.517	20.15	40	58.5629
293.462	20.2	40	-0.533469
296.407	20.25	40	137.229
299.352	20.3	40	99.5382
302.296	20.35	40	14.3568
305.241	20.4	40	41.7477
308.186	20.45	40	12.4686
311.131	20.5	40	-26.3773
314.076	20.55	40	12.9229
316.286	20.6	40	3.32919
316.286	20.65	40	19.3003
316.286	20.7	40	86.9813
316.286	20.75	40	16.4202
316.286	20.8	40	-17.5868
316.286	20.85	40	20.3556
316.286	20.9	40	130.311
316.286	20.95	40	130.226
316.286	21	40	20.4219
316.286	21.05	40	44.6194
316.286	21.1	40	6.8685
316.286	21.15	40	112.892
316.286	21.2	40	-5.33975
316.286	21.25	40	100.363
316.286	21.3	40	57.0056
316.286	21.35	40	-44.1048
316.286	21.4	40	9.3859
316.286	21.45	40	9.2435
316.286	21.5	40	24.5583
316.286	21.55	40	15.8395
316.286	21.6	40	-16.8251
316.286	21.65	40	-36.7206
316.286	21.7	40	95.1913
316.286	21.75	40	109.361
316.286	21.8	40	103.886
316.286	21.85	40	27.2157
316.286	21.9	40	32.4269
316.286	21.95	40	99.4011
316.286	22	40	23.194
316.286	22.05	40	46.3302
316.286	22.1	40	59.5161
316.286	22.15	40	48.6208
316.286	22.2	40	40.0334
316.286	22.25	40	132.581
316.286	22.3	40	-32.0636
316.286	22.35	40	29.7455
316.286	22.4	40	1.84637
316.286	22.45	40	-45.3826
316.286	22.5	40	-14.8445
316.286	22.55	40	72.2434
316.286	22.6	40	114.643
316.286	22.65	40	114.327
316.286	22.7	40	194.047
316.286	22.75	40	36.8718
316.286	22.8	40	70.6831
316.286	22.85	40	116.309
316.286	22.9	40	20.9419
316.286	22.95	40	90.3556
316.286	23	40	29.7624
316.286	23.05	40	-23.8406
316.286	23.1	40	-9.69366
316.286	23.15	40	93.0483
316.286	23.2	40	33.6731
318.291	23.25	40	120.043
321.787	23.3	40	-24.4813
325.283	23.35	40	74.4562
328.779	23.4	40	61.3117
332.275	23.45	40	-47.4394
335.771	23.5	40	50.1572
339.267	23.55	40	-34.0721
342.763	23.6	40	-51.7237
346.259	23.65	40	29.1176
349.755	23.7	40	16.2797
353.251	23.75	40	35.6976
356.747	23.8	40	-64.1706
360.243	23.85	40	17.4916
360.955	23.9	40	62.1942
360.955	23.95	40	-4.21656
360.955	24	40	52.7503
360.955	24.05	40	25.8033
360.955	24.1	40	121.535
360.955	24.15	40	77.3733
360.955	24.2	40	95.7841
360.955	24.25	40	6.55082
360.955	24.3	40	-18.4321
360.955	24.35	40	138.457
360.955	24.4	40	111.918
360.955	24.45	40	-13.061
360.955	24.5	40	56.0712
360.955	24.55	40	30.2864
360.955	24.6	40	36.1984
360.955	24.65	40	40.5657
360.955	24.7	40	97.0734
360.955	24.75	40	6.14493
360.955	24.8	40	27.293
360.955	24.85	40	-11.6823
360.955	24.9	40	-47.5924
360.955	24.95	40	26.6844
360.955	25	40	-4.60644
360.955	25.05	40	84.6143
360.955	25.1	40	101.854
360.955	25.15	40	-28.1093
360.955	25.2	40	-16.4936
360.955	25.25	40	-8.02733
360.955	25.3	40	-5.44126
360.955	25.35	40	71.8082
360.955	25.4	40	23.9124
360.955	25.45	40	-15.132
360.955	25.5	40	201.387
360.955	25.55	40	73.4795
360.955	25.6	40	65.4192
360.955	25.65	40	19.1287
360.955	25.7	40	69.5166
360.955	25.75	40	77.123
360.955	25.8	40	156.58
360.955	25.85	40	-31.9255
360.955	25.9	40	49.5648
360.955	25.95	40	72.6531
360.955	26	40	59.7786
360.955	26.05	40	34.2486
360.955	26.1	40	61.4901
360.955	26.15	40	100.637
360.955	26.2	40	14.1654
360.955	26.25	40	7.2405
360.955	26.3	40	75.4851
360.955	26.35	40	124.28
360.955	26.4	40	53.7811
360.955	26.45	40	14.1718
360.955	26.5	40	48.5075
360.955	26.55	40	-6.66377
360.955	26.6	40	-30.0478
360.955	26.65	40	-20.3068
360.955	26.7	40	63.3498
360.955	26.75	40	-14.8904
360.955	26.8	40	97.0255
360.955	26.85	40	-76.5856
360.955	26.9	40	131.103
360.955	26.95	40	23.2082
360.955	27	40	-16.3053
360.955	27.05	40	32.7715
360.955	27.1	40	28.8393
360.955	27.15	40	33.7168
360.955	27.2	40	48.1005
360.955	27.25	40	-32.2918
360.955	27.3	40	-7.54959
360.955	27.35	40	102.223
360.955	27.4	40	78.4591
360.955	27.45	40	22.8095
360.955	27.5	40	31.3796
360.955	27.55	40	27.5141
360.955	27.6	40	-33.944
360.955	27.65	40	87.6938
360.955	27.7	40	38.0622
360.955	27.75	40	3.65597
360.955	27.8	40	120.34
360.955	27.85	40	25.7619
360.955	27.9	40	87.5207
360.955	27.95	40	-25.8352
360.955	28	40	60.3216
360.955	28.05	40	135.871
360.955	28.1	40	-68.3963
360.955	28.15	40	37.3446
360.955	28.2	40	15.8212
360.955	28.25	40	24.5265
360.955	28.3	40	-17.8089
360.955	28.35	40	40.9091
360.955	28.4	40	40.7382
360.955	28.45	40	-5.44466
360.955	28.5	40	120.514
360.955	28.55	40	48.0894
360.955	28.6	40	-59.9234
360.955	28.65	40	202.769
360.955	28.7	40	-7.82467
360.955	28.75	40	17.2983
360.955	28.8	40	38.7045
360.955	28.85	40	58.7234
360.955	28.9	40	115.499
360.955	28.95	40	97.8925
360.955	29	40	-95.6896
360.955	29.05	40	43.8978
360.955	29.1	40	27.103
360.955	29.15	40	-82.1847
360.955	29.2	40	12.94
360.955	29.25	40	17.6624
360.955	29.3	40	35.6844
360.955	29.35	40	30.4023
360.955	29.4	40	-58.776
360.955	29.45	40	80.4879
360.955	29.5	40	51.076
363.672	29.55	40	94.3418
369.91	29.6	40	162.28
376.148	29.65	40	16.9115
382.387	29.7	40	30.2174
388.625	29.75	40	12.8752
394.863	29.8	40	21.8083
401.101	29.85	40	125.793
407.339	29.9	40	-38.7709
413.577	29.95	40	66.9104
419.816	30	40	9.94572
426.054	30.05	40	-22.5116
432.292	30.1	40	43.9805
438.53	30.15	40	0.0973657
443.66	30.2	40	-36.3273
443.66	30.25	40	53.2906
443.66	30.3	40	41.4705
443.66	30.35	40	-28.9157
443.66	30.4	40	110.044
443.66	30.45	40	18.2305
443.66	30.5	40	111.737
443.66	30.55	40	88.1116
443.66	30.6	40	-7.40549
443.66	30.65	40	83.6914
443.66	30.7	40	72.9567
443.66	30.75	40	65.0903
443.66	30.8	40	20.4583
443.66	30.85	40	4.6843
443.66	30.9	40	-13.2418
443.66	30.95	40	-93.4859
443.66	31	40	33.5862
443.66	31.05	40	95.9337
443.66	31.1	40	-31.6737
443.66	31.15	40	65.472
443.66	31.2	40	28.5195
443.66	31.25	40	184.052
443.66	31.3	40	-27.1388
443.66	31.35	40	-12.6993
443.66	31.4	40	31.4884
443.66	31.45	40	81.8522
443.66	31.5	40	63.8835
443.66	31.55	40	94.1074
443.66	31.6	40	-34.8536
443.66	31.65	40	136.903
443.66	31.7	40	76.5651
443.66	31.75	40	96.0693
443.66	31.8	40	49.3878
443.66	31.85	40	33.3755
443.66	31.9	40	204.448
443.66	31.95	40	97.1289
443.66	32	40	-50.3337
443.66	32.05	40	-39.3696
443.66	32.1	40	51.6135
443.66	32.15	40	100.846
443.66	32.2	40	26.2518
443.66	32.25	40	113.168
443.66	32.3	40	-38.0683
443.66	32.35	40	172.947
443.66	32.4	40	-90.2655
443.66	32.45	40	-17.7554
443.66	32.5	40	-54.1943
444.26	32.55	40	130.887
447.426	32.6	40	-47.5254
450.592	32.65	40	29.577
453.757	32.7	40	12.7155
456.923	32.75	40	32.8791
460.089	32.8	40	97.8257
463.255	32.85	40	38.2742
466.42	32.9	40	43.3823
469.586	32.95	40	195.623
472.752	33	40	-11.4724
475.918	33.05	40	24.4884
479.083	33.1	40	89.1641
481.083	33.15	40	101.929
481.083	33.2	40	-50.7073
481.083	33.25	40	139.202
481.083	33.3	40	49.5779
481.083	33.35	40	59.9189
481.083	33.4	40	19.9661
481.083	33.45	40	35.0033
481.083	33.5	40	29.5175
481.083	33.55	40	100.78
481.083	33.6	40	145.401
481.083	33.65	40	13.306
481.083	33.7	40	18.7828
481.083	33.75	40	-31.1551
481.083	33.8	40	66.2069
481.083	33.85	40	-0.76473
481.083	33.9	40	-54.8905
481.083	33.95	40	20.5557
481.083	34	40	-20.3312
481.083	34.05	40	3.44124
481.083	34.1	40	22.4975
481.083	34.15	40	59.8267
481.083	34.2	40	-3.42655
481.083	34.25	40	138.668
481.083	34.3	40	33.9367
481.083	34.35	40	19.078
481.083	34.4	40	64.7952
481.083	34.45	40	41.3567
481.083	34.5	40	-24.088
481.083	34.55	40	-3.49233
481.083	34.6	40	18.4854
481.083	34.65	40	33.6437
481.083	34.7	40	79.6078
481.083	34.75	40	-68.0398
481.083	34.8	40	102.471
481.083	34.85	40	-80.6602
481.083	34.9	40	-21.5384
481.083	34.95	40	139.895
481.083	35	40	-12.6379
481.083	35.05	40	0.870546
481.083	35.1	40	-42.8681
481.083	35.15	40	-44.079
481.083	35.2	40	-4.08523
481.083	35.25	40	71.5106
481.083	35.3	40	-52.0404
481.083	35.35	40	77.7738
481.083	35.4	40	68.7846
481.083	35.45	40	-3.21886
481.083	35.5	40	87.0631
481.083	35.55	40	17.0538
481.083	35.6	40	98.9564
481.083	35.65	40	84.9593
481.083	35.7	40	55.5551
481.083	35.75	40	62.3938
481.083	35.8	80	-23.4663
481.083	35.85	80	115.585
481.083	35.9	80	102.037
481.083	35.95	80	82.0708
481.083	36	80	154.108
481.083	36.05	80	75.434
481.083	36.1	80	141.409
481.083	36.15	80	23.6396
481.083	36.2	80	-19.8464
481.083	36.25	80	92.0122
481.083	36.3	80	-1.77768
481.083	36.35	80	83.9805
481.083	36.4	80	7.03088
481.083	36.45	80	51.1567
481.083	36.5	80	35.3559
481.083	36.55	80	-23.4781
481.083	36.6	80	85.0284
481.083	36.65	80	-75.4365
481.083	36.7	80	63.2944
481.083	36.75	80	139.503
481.083	36.8	80	5.92023
481.083	36.85	80	212.424
481.083	36.9	80	78.7993
481.083	36.95	80	132.808
481.083	37	80	115.917
481.083	37.05	80	142.252
481.083	37.1	80	63.406
481.083	37.15	80	33.3357
481.083	37.2	80	114.523
481.083	37.25	80	87.5368
481.083	37.3	80	51.8085
481.083	37.35	80	-7.65156
481.083	37.4	80	130.7
481.083	37.45	80	70.9802
481.083	37.5	80	159.873
481.083	37.55	80	122.358
481.083	37.6	80	127.812
481.083	37.65	80	51.5758
481.083	37.7	80	-26.8154
481.083	37.75	80	45.9517
481.083	37.8	80	47.2532
481.083	37.85	80	-14.2147
481.083	37.9	80	88.0548
481.083	37.95	80	130.737
481.083	38	80	-4.18306
481.083	38.05	80	189.742
481.083	38.1	80	102.435
481.083	38.15	80	49.4278
481.083	38.2	80	158.567
481.083	38.25	80	109.748
481.083	38.3	80	99.7092
481.083	38.35	80	20.2539
481.083	38.4	80	168.595
481.083	38.45	80	130.322
481.083	38.5	80	35.4963
481.083	38.55	80	64.3853
481.083	38.6	80	4.5304
481.083	38.65	80	114.751
481.083	38.7	80	140.803
481.083	38.75	80	-14.091
481.083	38.8	80	231.188
481.083	38.85	80	75.7468
481.083	38.9	80	31.0411
481.083	38.95	80	-50.7788
481.083	39	80	108.736
481.083	39.05	80	34.2414
481.083	39.1	80	17.6464
481.083	39.15	80	56.1154
481.083	39.2	80	84.6151
481.083	39.25	80	99.0377
481.083	39.3	80	119.934
481.083	39.35	80	162.355
481.083	39.4	80	21.0015
481.083	39.45	80	0.935232
481.083	39.5	80	126.708
481.083	39.55	80	91.9197
481.083	39.6	80	76.0651
481.083	39.65	80	129.184
481.083	39.7	80	98.865
481.083	39.75	80	78.6229
481.083	39.8	80	175.913
481.083	39.85	80	142.505
481.083	39.9	80	21.7126
481.083	39.95	80	113.189
481.083	40	80	98.0388
481.083	40.05	80	104.274
481.083	40.1	80	93.1916
481.083	40.15	80	92.5105
481.083	40.2	80	46.4668
481.083	40.25	80	71.7783
481.083	40.3	80	101.518
481.083	40.35	80	218.895
481.083	40.4	80	163.83
481.083	40.45	80	192.279
481.083	40.5	80	20.5186
481.083	40.55	80	121.925
481.083	40.6	80	54.8945
481.083	40.65	80	166.197
481.083	40.7	80	116.638
481.083	40.75	80	59.6226
481.083	40.8	80	10.9189
481.083	40.85	80	121.075
481.083	40.9	80	123.896
481.083	40.95	80	197.992
481.083	41	80	117.142
481.083	41.05	80	114.514
481.083	41.1	80	75.6048
481.083	41.15	80	115.504
481.083	41.2	80	120.37
481.083	41.25	80	87.4285
481.083	41.3	80	122.076
481.083	41.35	80	131.688
481.083	41.4	80	48.2629
481.083	41.45	80	14.5789
481.083	41.5	80	119.35
481.083	41.55	80	27.6361
481.083	41.6	80	77.1823
481.083	41.65	80	116.395
481.083	41.7	80	57.9744
481.083	41.75	80	111.881
481.083	41.8	80	8.51304
481.083	41.85	80	-44.8988
481.083	41.9	80	109.115
481.083	41.95	80	54.0545
481.083	42	80	135.225
481.083	42.05	80	-18.5493
481.083	42.1	80	-20.4776
481.083	42.15	80	45.4338
481.083	42.2	80	-3.62112
481.083	42.25	80	130.883
481.083	42.3	80	123.434
481.083	42.35	80	182.282
481.083	42.4	80	103.63
481.083	42.45	80	89.3469
481.083	42.5	80	164.369
481.083	42.55	80	113.216
481.083	42.6	80	131.03
481.083	42.65	80	7.28879
481.083	42.7	80	-0.425706
481.083	42.75	80	166.687
		80	139.056
		80	121.037
		80	77.1774
		80	135.601
		80	-23.2666
		80	43.3275
		80	39.0174
		80	91.5008
		80	70.7289
		80	121.119
		80	167.892
		80	122.193
		80	139.695
		80	124.895
		80	-5.18885
		80	134.944
		80	73.6345
		80	109.649
		80	127.342
		80	23.2099
		80	166.597
		80	235.835
		80	61.7121
		80	131.806
		80	-32.2264
		80	59.428
		80	5.73944
		80	17.1509
		80	101.609
		80	49.2508
		80	27.9416
		80	-16.3091
		80	127.822
		80	74.3774
		80	-39.8692
		80	102.037
		80	117.37
		80	107.127
		80	224.232
		80	102.447
		80	-10.9096
		80	14.1234
		80	191.021
		80	204.372
		80	178.007
		80	95.4922
		80	108.986
		80	-49.21
		80	178.807
		80	129.699
		80	44.1122
		80	108.357
		80	156.603
		80	131.804
		80	132.823
		80	169.455
		80	165.267
		80	212.557
		80	113.477
		80	108.02
		80	85.9802
		80	13.3416
		80	118.072
		80	105.351
		80	42.2188
		80	44.7061
		80	-12.2776
		80	119.877
		80	114.941
		80	74.2275
		80	152.38
		80	17.8423
		80	76.4234
		80	1.02456
		80	55.6695
		80	32.1861
		80	91.9564
		80	45.0728
		80	145.006
		80	90.7874
		80	239.899
		80	137.107
		80	245.197
		80	77.7488
		80	26.3509
		80	75.3622
		80	191.051
		80	167.721
		80	78.1023
		80	157.523
		80	54.6112
		80	50.7281
		80	79.6916
		80	-3.2411
		80	-54.0943
		80	79.5438
		80	116.923
		80	84.3294
		80	19.0732
		80	186.409
		80	184.307
		80	84.8852
		80	-13.4163
		80	220.171
		80	50.9098
		80	125.984
		80	129.772
		80	134.6
		80	120.971
		80	120.965
		80	153.798
		80	4.70337
		80	18.3343
		80	16.8886
		80	87.3676
		80	42.9916
		80	83.0227
		80	110.346
		80	-2.64772
		80	174.643
		80	114.695
		80	58.644
		80	155.519
		80	32.1039
		80	77.2635
		80	81.2314
		80	-9.86971
		80	96.7006
		80	25.9513
		80	61.3649
		80	156.384
		80	82.7067
		80	113.388
		80	120.498
		80	122.807
		80	106.75
		80	143.882
		80	-19.0044
		80	7.4462
		80	112.834
		80	74.9856
		80	127.599
		80	133.132
		80	28.3162
		80	122.615
		80	148.534
		80	70.0496
		80	101.865
		80	75.4573
		80	23.7699
		80	47.8095
		80	133.955
		80	95.4985
		80	115.706
		80	199.865
		80	125.59
		80	168.376
		80	-47.4985
		80	159.864
		80	86.0341
		80	88.601
		80	59.0504
		80	123.22
		80	93.3803
		80	95.2854
		80	37.7222
		80	108.39
		80	134.562
		80	38.8823
		80	189.971
		80	-7.62431
		80	159.056
		80	71.8407
		80	-3.85605
		80	135.39
		80	104.358
		80	44.4571
		80	39.0533
		80	89.8002
		80	45.3057
		80	-33.5678
		80	96.5289
		80	24.6182
		80	54.1316
		80	11.9689
		80	82.1484
		80	171.824
		80	114.271
		80	170.261
		80	99.8367
		80	52.365
		80	20.1366
		80	54.4274
		80	126.16
		80	35.0686
		80	135.787
		80	38.4521
		80	82.2166
		80	221.896
		80	110.261
		80	126.039
		80	6.40234
		80	58.204
		80	86.4343
		80	93.7656
		80	-19.5032
		80	22.9692
		80	108.284
		80	86.5019
		80	85.1348
		80	48.1393
		80	96.4641
		80	8.37902
		80	143.341
		80	74.3178
		80	132.198
		80	117.391
		80	7.24352
		80	-8.3385
		80	88.224
		80	121.622
		80	92.5369
		80	87.3758
		80	98.6458
		80	105.423
		80	47.9991
		80	75.4761
		80	21.0938
		80	105.579
		80	190.971
		80	59.3561
		80	-5.33292
		80	-32.2812
		80	69.2877
		80	4.21191
		80	50.0423
		80	72.1305
		80	124.028
		80	-35.6895
		80	116.783
		80	106.536
		80	125.452
		80	77.3475
		80	70.5757
		80	64.7498
		80	0.0981339
		80	122.433
		80	9.52237
		80	72.1339
		80	-0.361047
		80	137.502
		80	-21.315
		80	166.693
		80	56.7378
		80	125.773
		80	71.9202
		80	44.1104
		80	66.0378
		80	168.589
		80	43.8654
		80	-40.4837
		80	90.0364
		80	117.333
		80	-7.39683
		80	131.736
		80	127.437
		80	71.0181
		80	95.5082
		80	-10.8101
		80	72.8669
		80	84.6946
		80	74.0764
		80	-69.8468
		80	-68.6064
		80	-33.1431
		80	-113.473
		80	134.156
		80	107.481
		80	-88.1437
		80	60.4398
		80	119.77
		80	42.2827
		80	78.2846
		80	30.2789
		80	24.5709
		80	117.649
		80	210.024
		80	33.0328
		80	77.5865
		80	108.006
		80	97.5078
		80	77.0897
		80	71.9268
		80	84.5811
		80	210.938
		80	47.4662
		80	77.9887
		80	167.543
		80	19.8201
		80	94.5974
		80	-82.1858
		80	105.651
		80	29.9727
		80	83.4217
		80	102.813
		80	85.5329
		80	185.631
		80	81.5147
		80	103.966
		80	197.163
		80	-6.70274
		80	33.6814
		80	105.965
		80	-13.3869
		80	112.954
		80	-4.60721
		80	158.913
		80	163.822
		80	110.989
		80	107.375
		80	37.8045
		80	144.958
		80	130.309
		80	53.4809
		80	128.877
		80	-12.0373
		80	209.79
		80	53.0887
		80	-24.2637
		80	95.3719
		80	26.0287
		80	86.4196
		80	85.8385
		80	114.531
		80	142.788
		80	90.3059
		80	64.54
		80	104.749
		80	146.924
		80	126.84
		80	90.3443
		80	163.63
		80	92.7312
		80	-16.3024
		80	158.792
		80	254.791
		80	5.8881
		80	92.3956
		80	50.2883
		80	19.8702
		80	8.75832
		80	90.8392
		80	28.9596
		80	121.265
		80	130.76
		80	-20.1074
		80	94.656
		80	120.433
		80	111.403
		80	136.015
		80	241.318
		80	154.13
		80	92.729
		80	57.5669
		80	50.3881
		80	96.0573
		80	29.6322
		80	-43.0854
		80	68.0499
		80	95.0995
		80	75.6509
		80	55.725
		80	174.948
		80	4.68994
		80	53.9946
		80	125.582
		80	144.53
		80	39.3614
		80	170.226
		80	133.324
		80	207.406
		80	-3.85164
		80	12.4425
		80	105.472
		80	61.2159
		80	134.289
		80	71.103
		80	134.18
		80	6.68389
		80	47.9248
		80	-43.9155
		80	49.7331
		80	181.438
		80	123.806
		80	26.4614
		80	80.2813
		80	76.4214
		80	141.78
		80	127.441
		80	211.271
		80	-0.08669
		80	41.8172
		80	172.373
		80	59.084
		80	107.493
		80	107.25
		80	100.988
		80	81.2655
		80	93.3288
		80	196.147
		80	139.608
		80	138.457
		80	63.8325
		80	130.61
		80	74.4456
		80	169.803
		80	0.79506
		80	69.8939
		80	107.488
		80	73.482
		80	92.0973
		80	58.9258
		80	-33.9413
		80	92.5863
		80	98.3134
		80	36.431
		80	122.112
		80	25.916
		80	97.5793
		80	118.364
		80	80.6301
		80	138.517
		80	7.86971
		80	151.225
		80	60.719
		80	187.694
		80	111.787
		80	58.3357
		80	21.6646
		80	80.9276
		80	110.228
		120	61.2595
		120	164.579
		120	41.7851
		120	70.6011
		120	123.21
		120	160.556
		120	139.695
		120	214.86
		120	129.313
		120	97.7562
		120	72.225
		120	103.32
		120	34.2761
		120	229.937
		120	111.979
		120	152.221
		120	20.7421
		120	108.159
		120	95.0134
		120	185.825
		120	59.812
		120	4.27746
		120	181.757
		120	67.2674
		120	96.7178
		120	144.582
		120	190.963
		120	207.422
		120	49.311
		120	38.1566
		120	172.204
		120	112.412
		120	135.121
		120	138.278
		120	229.477
		120	109.569
		120	112.508
		120	120.612
		120	283.457
		120	78.6452
		120	189.951
		120	64.6952
		120	91.4462
		120	60.3378
		120	-3.88636
		120	16.4273
		120	112.399
		120	106.53
		120	243.598
		120	199.013
		120	38.3755
		120	110.882
		120	128.019
		120	99.7028
		120	111.719
		120	88.164
		120	188.397
		120	11.7297
		120	114.266
		120	21.3818
		120	175.058
		120	159.133
		120	146.54
		120	76.8253
		120	55.6021
		120	140.571
		120	2.03988
		120	216.004
		120	168.374
		120	75.3207
		120	137.279
		120	95.4798
		120	60.5853
		120	79.0255
		120	8.84788
		120	80.4807
		120	7.31252
		120	51.3783
		120	124.685
		120	29.199
		120	111.191
		120	57.7709
		120	238.614
		120	135.009
		120	70.5917
		160	185.787
		160	183.628
		160	101.3
		160	134.173
		160	226.717
		160	191.144
		160	169.622
		160	214.966
		160	229.123
		160	86.0211
		160	158.867
		160	129.921
		160	101.624
		160	171.001
		160	6.99777
		160	72.2863
		160	144.546
		160	190.53
		160	234.388
		160	379.602
		160	64.3089
		160	147.895
		160	176.435
		160	160.73
		160	149.815
		160	6.24044
		160	150.793
		160	208.72
		160	221.752
		160	109.547
		200	167.47
		200	193.714
		200	232.859
		200	223.769
		200	69.9832
		200	171.235
		200	186.998
		200	230.333
		200	184.073
		200	96.0804
		200	152.129
		200	175.719
		200	228.336
		200	248.814
		200	311.51
		200	215.431
		200	224.902
		200	158.792
		200	145.051
		200	224.34
		200	101.666
		200	314.283
		200	148.523
		200	231.774
		200	138.842
		200	216.362
		200	278.046
		200	324.859
		200	351.742
		200	245.268
		200	240.668
		200	208.726
		200	334.211
		200	295.757
		200	271.726
		200	151.09
		200	286.463
		200	217.518
		200	179.985
		200	247.817
		200	123.982
		200	208.552
		200	216.982
		200	240.502
		200	178.49
		200	96.5315
		200	168.254
		200	242.576
		200	161.794
		200	126.354
		200	104.851
		200	141.364
		200	210.206
		200	177.145
		200	163.271
		200	239.329
		200	273.83
		200	129.644
		200	177.686
		200	274.671
		200	139.161
		200	211.385
		200	314.388
		200	209.402
		200	222.206
		200	208.728
		200	225.96
		200	226.012
		200	222.889
		200	188.945
		200	188.671
		200	95.0285
		200	209.615
		200	184.558
		200	244.743
		200	181.686
		200	198.239
		200	335.179
		200	137.256
		200	172.296
		200	301.389
		200	141.62
		200	144.5
		200	269.078
		200	134.636
		200	275.674
		200	305.959
		200	231.889
		200	268.498
		200	116.918
		200	193.569
		200	191.167
		200	183.72
		200	143.833
		200	117.222
		200	221.031
		200	314.66
		200	140.796
		200	310.295
		200	258.059
		200	238.982
		200	184.157
		200	232.172
		200	279.299
		200	220.106
		200	283.562
		200	149.026
		200	273.806
		200	169.654
		200	283.275
		200	215.88
		200	153.599
		200	277.291
		200	229.271
		200	204.614
		200	242.529
		200	171.701
		200	185.19
		200	192.742
		200	216.719
		200	145.059
		200	270.977
		200	246.26
		200	321.279
		200	191.754
		200	299.563
		200	186.431
		200	229.734
		200	251.526
		200	238.3
		200	223.737
		200	273.621
		200	212.284
		200	264.907
		200	89.056
		200	172.923
		200	271.687
		200	220.076
		200	95.2863
		200	154.97
		200	171.278
		200	133.105
		200	192.891
		200	199.018
		200	150.793
		200	220.78
		200	146.25
		200	237.276
		200	246.489
		200	276.538
		200	154.056
		200	54.2209
		200	184.186
		200	170.971
		200	202.855
		200	97.8499
		200	237.806
		200	201.61
		200	182.298
		200	201.136
		200	136.75
		200	221.049
		200	165.691
		200	272.568
		200	292.574
		200	152.777
		200	141.958
		200	187.393
		200	208.386
		200	196.517
		200	139.306
		200	219.72
		200	161.121
		200	172.487
		200	180.336
		200	274.746
		200	197.229
		200	186.66
		200	230.827
		200	122.01
		200	144.825
		200	297.714
		200	199.753
		200	229.182
		200	315.496
		200	195.583
		200	137.471
		200	240.155
		200	115.024
		200	220.194
		200	230.733
		200	187.342
		200	191.988
		200	227.541
		200	240.179
		200	127.97
		200	295.226
		200	148.431
		200	144.721
		200	171.352
		200	202.578
		200	194.625
		200	272.124
		200	231.474
		200	218.794
		200	175.304
		200	282.829
		200	234.582
		200	225.486
		200	157.584
		200	186.714
		200	128.189
		200	271.699
		200	176.094
		200	306.347
		200	279.67
		200	226.601
		200	276.327
		200	185.095
		200	154.013
		200	148.715
		200	167.868
		200	164.667
		200	198.767
		200	203.59
		200	137.014
		200	265.164
		200	108.036
		200	234.905
		200	257.438
		200	201.202
		200	208.25
		200	227.001
		200	184.925
		200	111.871
		200	214.45
		200	178.699
		200	272.076
		200	169.341
		200	236.576
		200	165.819
		200	155.783
		200	208.231
		200	166.312
		200	206.457
		200	118.987
		200	246.176
		200	59.1478
		200	138.886
		200	213.895
		200	160.515
		200	121.477
		200	183.864
		200	240.435
		200	188.972
		200	249.302
		200	196.53
		200	189.136
		200	150.927
		200	268.7
		200	133.387
		200	122.984
		200	179.789
		200	197.105
		200	215.333
		200	197.152
		200	138.147
		200	281.747
		200	266.427
		200	263.061
		200	227.678
		200	196.057
		200	202.831
		200	288.735
		200	220.634
		200	220.401
		200	306.11
		200	281.764
		200	115.252
		200	239.423
		200	320.612
		200	299.16
		200	298.298
		200	158.549
		200	227.338
		200	252.282
		200	229.455
		200	53.5837
		200	324.418
		200	211.624
		200	248.914
		200	193.707
		200	242.313
		200	235.187
		200	242.148
		200	73.5014
		200	176.692
		200	164.512
		200	140.15
		200	125.593
		200	189.523
		200	178.289
		200	226.192
		200	200.263
		200	217.759
		200	135.429
		200	190.639
		200	165.241
		200	119.251
		200	153.003
		200	202.108
		200	193.858
		200	237.307
		200	220.26
		200	145.544
		200	265.944
		200	178.563
		200	175.217
		200	194.165
		200	212.434
		200	142.294
		200	198.296
		200	194.331
		200	171.704
		200	274.893
		200	136.449
		200	211.471
		200	235.092
		200	150.098
		200	283.269
		200	95.019
		200	236.346
		200	105.532
		200	168.139
		200	204.726
		200	160.695
		200	189.347
		200	160.712
		200	199.5
		200	173.979
		200	186.185
		200	163.675
		200	231.488
		200	209.068
		200	252.746
		200	208.479
		200	159.42
		200	167.811
		200	235.062
		200	87.9802
		200	193.778
		200	297.717
		200	219.841
		200	139.11
		200	225.299
		200	144.842
		200	185.084
		200	180.825
		200	165.547
		200	132.086
		200	120.421
		200	252.161
		200	156.609
		200	194.372
		200	194.563
		200	208.723
		200	202.391
		200	158.588
		200	218.758
		200	208.159
		200	186.098
		200	159.746
		200	96.6188
		200	198.947
		200	263.15
		200	167.68
		200	66.1201
		200	250.235
		200	62.2011
		200	137.436
		200	150.051
		200	232.879
		200	205.354
		200	215.136
		200	199.984
		200	193.457
		200	175.724
		200	246.9
		200	51.1694
		200	191.433
		200	151.86
		200	204.683
		200	157.14
		200	297.525
		200	175.265
		200	169.226
		200	222.414
		200	250.146
		200	153.655
		200	195.473
		200	287.51
		200	273.1
		200	226.116
		200	121.735
		200	159.77
		200	136.613
		200	151.106
		200	269.46
		200	149.222
		200	246.573
		200	146.933
		200	230.265
		200	217.815
		200	237.654
		200	155.027
		200	256.815
		200	123.418
		200	311.877
		200	344.652
		200	187.351
		200	219.507
		200	167.067
		200	211.001
		200	124.198
		200	93.6136
		200	275.897
		200	150.508
		200	234.729
		200	282.64
		200	193.262
		200	241.711
		200	220.338
		200	238.908
		200	143.395
		200	224.539
		200	192.171
		200	228.906
		200	68.1042
		200	258.565
		200	140.917
		200	129.113
		200	137.299
		200	165.858
		200	153.523
		200	230.92
		200	167.435
		200	227.53
		200	219.486
		200	286.716
		200	212.471
		200	150.11
		200	134.241
		200	243.567
		200	145.874
		200	236.007
		200	214.739
		200	158.211
		200	138.171
		200	297.334
		200	276.253
		200	248.255
		200	167.155
		200	168.46
		200	139.918
		200	164.02
		200	185.33
		200	36.73
		200	205.643
		200	261.691
		200	280.797
		200	200.76
		200	262.838
		200	238.057
		200	290.773
		200	132.371
		200	231.835
		200	124.874
		200	230.743
		200	123.924
		200	161.204
		200	188.806
		200	245.854
		200	210.362
		200	319.616
		200	201.372
		200	200.805
		200	215.728
		200	170.132
		200	205.253
		200	356.336
		200	218.098
		200	126.547
		200	252.715
		200	325.568
		200	259.072
		200	211.435
		200	120.911
		200	295.198
		200	166.436
		200	191.201
		200	158.155
		200	202.568
		200	131.145
		200	160.737
		200	99.3538
		200	262.361
		200	297.819
		200	251.708
		200	162.504
		200	120.498
		200	200.543
		200	144.296
		200	53.4307
		200	181.862
		200	257.513
		200	220.807
		200	217.621
		200	215.335
		200	214.83
		200	338.821
		200	225.838
		200	223.361
		200	203.442
		200	169.565
		200	163.804
		200	138.035
		200	150.64
		200	274.947
		200	164.109
		200	179.888
		200	166.671
		200	230.024
		200	124.715
		200	292.327
		200	179.918
		200	124.481
		200	174.249
		200	239.237
		200	202.012
		200	168.053
		200	59.0225
		200	259.45
		200	127.644
		200	145.74
		200	241.792
		200	109.527
		200	170.935
		200	194.462
		200	221.946
		200	172.473
		200	249.874
		200	257.807
		200	156.318
		200	252.2
		200	210.59
		200	240.895
		200	199.592
		200	162.217
		200	226.839
		200	153.244
		200	303.859
		200	185.072
		200	184.745
		200	261.589
		200	176.843
		200	215.706
		200	254.36
		200	215.466
		200	114.713
		200	98.843
		200	183.038
		200	248.502
		200	203.021
		200	135.543
		200	199.267
		200	105.677
		200	208.795
		200	208.884
		200	53.008
		200	130.091
		200	117.886
		200	195.747
		200	145.267
		200	227.375
		200	248.429
		200	167.023
		200	219.282
[truncated: 6,564 more rows]
