# Supplementary material for: Topoisomerase VI is a chirally-selective, preferential DNA decatenase
Source: eLife. 2022 Jan 25;11:e67021. doi: 10.7554/eLife.67021 (PMC8837201; doi:10.7554/eLife.67021)
Supplement: Figure 4—source data 1. [file elife-67021-fig4-data1.csv]

Magent_Turns	DNA_Extension_Microns
-30	-0.00932237
-29	0.0568753
-28	0.122845
-27	0.207015
-26	0.282527
-25	0.361891
-24	0.432368
-23	0.496879
-22	0.562282
-21	0.62142
-20	0.674593
-19	0.712716
-18	0.738484
-17	0.763617
-16	0.787608
-15	0.807321
-14	0.824773
-13	0.84214
-12	0.852252
-11	0.865725
-10	0.881122
-9	0.899999
-8	0.91125
-7	0.933202
-6	0.941257
-5	0.954215
-4	0.973998
-3	0.978851
-2	1.00045
-1	1.01541
0	1.09028
1	1.00366
2	0.99057
3	0.976761
4	0.959778
5	0.947454
6	0.927656
7	0.916444
8	0.900766
9	0.883137
10	0.869427
11	0.855202
12	0.84098
13	0.827118
14	0.807929
15	0.790893
16	0.772223
17	0.758294
18	0.727511
19	0.692933
20	0.667223
21	0.616618
22	0.56808
23	0.509189
24	0.439425
25	0.37156
26	0.289009
27	0.207189
28	0.147222
29	0.0587803
30	0
