# Supplementary material for: Topoisomerase VI is a chirally-selective, preferential DNA decatenase
Source: eLife. 2022 Jan 25;11:e67021. doi: 10.7554/eLife.67021 (PMC8837201; doi:10.7554/eLife.67021)
Supplement: Figure 6—figure supplement 1—source data 1. [file elife-67021-fig6-figsupp1-data1.csv]

Force_pN	Positive_Supercoil_Average	Positive_Supercoil_SE
0.2	5.77928	2.01549
0.5	10.7609	1.53955
1	9.05604	2.19221
1.5	2.06709	0.300085
2	1.85112	0.381597
