# Supplementary material for: Topoisomerase VI is a chirally-selective, preferential DNA decatenase
Source: eLife. 2022 Jan 25;11:e67021. doi: 10.7554/eLife.67021 (PMC8837201; doi:10.7554/eLife.67021)
Supplement: Figure 7—figure supplement 1—source data 1. [file elife-67021-fig7-figsupp1-data1.csv]

Magent_Rotation	DNA_Extension	fit_DNA_Extension
-1.8	0.117404	0.281757
-1.7	0.159748	0.282307
-1.6	0.204933	0.283144
-1.5	0.201765	0.284266
-1.4	0.178814	0.285668
-1.3	0.168797	0.287346
-1.2	0.177772	0.289293
-1.1	0.199599	0.291503
-1	0.18764	0.29397
-0.9	0.165884	0.296684
-0.8	0.177248	0.299638
-0.7	0.21771	0.302823
-0.6	0.255981	0.306229
-0.5	0.272665	0.309847
-0.4	0.259029	0.313666
-0.3	0.344416	0.317677
-0.2	0.454255	0.32187
-0.1	0.559438	0.326235
0	0.636552	0.33076
0.1	0.65065	0.335437
0.2	0.62256	0.340255
0.3	0.540698	0.345204
0.4	0.445758	0.350275
0.5	0.338273	0.355457
0.6	0.266538	0.360742
0.7	0.256676	0.366121
0.8	0.256059	0.371585
0.9	0.249449	0.377125
1	0.225756	0.382732
1.1	0.172656	0.3884
1.2	0.154937	0.394119
1.3	0.189076	0.399882
1.4	0.217825	0.405683
1.5	0.21808	0.411514
1.6	0.183846	0.417367
1.7	0.181894	0.423237
1.8	0.175512	0.429118
1.9	0.169114	0.435002
		0.440884
		0.446759
		0.452621
		0.458465
		0.464285
		0.470077
		0.475835
		0.481556
		0.487235
		0.492868
		0.49845
		0.503978
		0.509448
		0.514856
		0.520198
		0.525472
		0.530673
		0.535799
		0.540847
		0.545813
		0.550695
		0.55549
		0.560195
		0.564808
		0.569326
		0.573747
		0.578068
		0.582288
		0.586404
		0.590414
		0.594316
		0.598108
		0.601789
		0.605357
		0.608809
		0.612145
		0.615362
		0.61846
		0.621436
		0.624291
		0.627021
		0.629627
		0.632106
		0.634459
		0.636683
		0.638778
		0.640743
		0.642577
		0.644279
		0.645849
		0.647286
		0.648589
		0.649758
		0.650792
		0.651692
		0.652455
		0.653083
		0.653574
		0.65393
		0.654149
		0.654231
		0.654177
		0.653986
		0.653658
		0.653195
		0.652595
		0.651859
		0.650988
		0.649981
		0.64884
		0.647564
		0.646155
		0.644612
		0.642937
		0.641129
		0.639191
		0.637123
		0.634925
		0.632599
		0.630145
		0.627565
		0.62486
		0.622031
		0.61908
		0.616007
		0.612814
		0.609502
		0.606073
		0.60253
		0.598872
		0.595102
		0.591222
		0.587234
		0.58314
		0.578941
		0.57464
		0.57024
		0.565741
		0.561148
		0.556461
		0.551685
		0.54682
		0.541871
		0.53684
		0.53173
		0.526544
		0.521285
		0.515956
		0.510561
		0.505104
		0.499588
		0.494016
		0.488394
		0.482724
		0.477011
		0.47126
		0.465474
		0.45966
		0.453821
		0.447962
		0.442089
		0.436208
		0.430323
		0.424442
		0.418569
		0.412712
		0.406876
		0.401069
		0.395297
		0.389568
		0.383889
		0.378269
		0.372714
		0.367234
		0.361837
		0.356532
		0.351328
		0.346234
		0.341259
		0.336413
		0.331707
		0.327149
		0.322751
		0.318522
		0.314473
		0.310613
		0.306953
		0.303503
		0.300272
		0.29727
		0.294506
		0.291988
		0.289725
		0.287723
		0.28599
		0.284531
		0.283351
		0.282455
		0.281847
		0.281527
		0.281497
		0.281757
