# Supplementary material for: Topoisomerase VI is a chirally-selective, preferential DNA decatenase
Source: eLife. 2022 Jan 25;11:e67021. doi: 10.7554/eLife.67021 (PMC8837201; doi:10.7554/eLife.67021)
Supplement: Figure 7—source data 1. [file elife-67021-fig7-data1.csv]

DNA_Extension	Time_Seconds
0.606	1480.02
0.635	1480.03
0.666	1480.03
0.651	1480.04
0.605	1480.04
0.606	1480.05
0.624	1480.05
0.635	1480.06
0.597	1480.06
0.648	1480.07
0.633	1480.07
0.621	1480.08
0.666	1480.08
0.643	1480.09
0.629	1480.09
0.638	1480.1
0.639	1480.1
0.669	1480.11
0.666	1480.11
0.644	1480.12
0.656	1480.12
0.647	1480.12
0.591	1480.13
0.599	1480.13
0.555	1480.14
0.619	1480.14
0.619	1480.15
0.661	1480.15
0.64	1480.16
0.622	1480.16
0.577	1480.17
0.602	1480.17
0.642	1480.18
0.665	1480.18
0.646	1480.19
0.644	1480.19
0.636	1480.2
0.635	1480.2
0.638	1480.21
0.614	1480.21
0.639	1480.22
0.649	1480.23
0.663	1480.23
0.655	1480.24
0.683	1480.24
0.648	1480.25
0.645	1480.25
0.645	1480.26
0.62	1480.26
0.597	1480.27
0.594	1480.27
0.647	1480.28
0.665	1480.28
0.594	1480.29
0.609	1480.29
0.64	1480.3
0.655	1480.3
0.676	1480.31
0.656	1480.31
0.625	1480.32
0.662	1480.32
0.614	1480.33
0.641	1480.33
0.654	1480.34
0.652	1480.34
0.659	1480.35
0.663	1480.35
0.584	1480.36
0.647	1480.36
0.642	1480.37
0.682	1480.37
0.624	1480.38
0.659	1480.38
0.63	1480.38
0.663	1480.39
0.645	1480.39
0.6	1480.4
0.618	1480.4
0.662	1480.41
0.578	1480.41
0.667	1480.42
0.643	1480.42
0.621	1480.43
0.661	1480.43
0.667	1480.44
0.666	1480.44
0.667	1480.45
0.625	1480.45
0.631	1480.46
0.668	1480.46
0.659	1480.47
0.652	1480.48
0.642	1480.48
0.631	1480.49
0.654	1480.49
0.676	1480.5
0.662	1480.5
0.659	1480.51
0.6	1480.51
0.669	1480.52
0.663	1480.52
0.634	1480.53
0.658	1480.53
0.665	1480.54
0.647	1480.54
0.64	1480.55
0.616	1480.55
0.681	1480.56
0.637	1480.56
0.616	1480.57
0.643	1480.57
0.644	1480.58
0.618	1480.58
0.646	1480.59
0.626	1480.59
0.65	1480.6
0.632	1480.6
0.616	1480.61
0.605	1480.61
0.627	1480.62
0.624	1480.62
0.627	1480.62
0.66	1480.63
0.662	1480.63
0.639	1480.64
0.683	1480.64
0.637	1480.65
0.61	1480.65
0.65	1480.66
0.638	1480.66
0.651	1480.67
0.659	1480.67
0.634	1480.68
0.606	1480.68
0.573	1480.69
0.657	1480.69
0.672	1480.7
0.615	1480.7
0.633	1480.71
0.663	1480.71
0.653	1480.72
0.589	1480.73
0.622	1480.73
0.639	1480.74
0.619	1480.74
0.636	1480.75
0.645	1480.75
0.643	1480.76
0.681	1480.76
0.642	1480.77
0.619	1480.77
0.666	1480.78
0.659	1480.78
0.649	1480.79
0.624	1480.79
0.662	1480.8
0.673	1480.8
0.654	1480.81
0.657	1480.81
0.634	1480.82
0.608	1480.82
0.677	1480.83
0.642	1480.83
0.659	1480.84
0.677	1480.84
0.66	1480.85
0.647	1480.85
0.653	1480.86
0.639	1480.86
0.67	1480.87
0.638	1480.87
0.634	1480.88
0.65	1480.88
0.65	1480.88
0.663	1480.89
0.644	1480.89
0.598	1480.9
0.643	1480.9
0.647	1480.91
0.597	1480.91
0.651	1480.92
0.644	1480.92
0.579	1480.93
0.602	1480.93
0.657	1480.94
0.662	1480.94
0.631	1480.95
0.632	1480.95
0.624	1480.96
0.644	1480.96
0.612	1480.97
0.64	1480.98
0.612	1480.98
0.645	1480.99
0.634	1480.99
0.65	1481
0.63	1481
0.633	1481.01
0.671	1481.01
0.671	1481.02
0.67	1481.02
0.659	1481.03
0.641	1481.03
0.622	1481.04
0.627	1481.04
0.6	1481.05
0.634	1481.05
0.644	1481.06
0.655	1481.06
0.618	1481.07
0.674	1481.07
0.654	1481.08
0.66	1481.08
0.663	1481.09
0.681	1481.09
0.606	1481.1
0.668	1481.1
0.657	1481.11
0.67	1481.11
0.639	1481.12
0.592	1481.12
0.586	1481.12
0.628	1481.13
0.636	1481.13
0.602	1481.14
0.658	1481.14
0.616	1481.15
0.632	1481.15
0.614	1481.16
0.576	1481.16
0.636	1481.17
0.639	1481.17
0.612	1481.18
0.623	1481.18
0.641	1481.19
0.636	1481.19
0.555	1481.2
0.611	1481.2
0.642	1481.21
0.629	1481.21
0.646	1481.22
0.655	1481.23
0.635	1481.23
0.638	1481.24
0.659	1481.24
0.634	1481.25
0.651	1481.25
0.636	1481.26
0.633	1481.26
0.651	1481.27
0.664	1481.27
0.649	1481.28
0.598	1481.28
0.667	1481.29
0.612	1481.29
0.639	1481.3
0.614	1481.3
0.668	1481.31
0.633	1481.31
0.637	1481.32
0.597	1481.32
0.614	1481.33
0.636	1481.33
0.659	1481.34
0.636	1481.34
0.624	1481.35
0.611	1481.35
0.629	1481.36
0.629	1481.36
0.571	1481.37
0.56	1481.37
0.594	1481.38
0.635	1481.38
0.655	1481.38
0.662	1481.39
0.617	1481.39
0.647	1481.4
0.655	1481.4
0.601	1481.41
0.636	1481.41
0.632	1481.42
0.632	1481.42
0.616	1481.43
0.613	1481.43
0.667	1481.44
0.655	1481.44
0.656	1481.45
0.64	1481.45
0.658	1481.46
0.603	1481.46
0.552	1481.47
0.589	1481.48
0.604	1481.48
0.619	1481.49
0.654	1481.49
0.648	1481.5
0.676	1481.5
0.658	1481.51
0.664	1481.51
0.645	1481.52
0.663	1481.52
0.67	1481.53
0.593	1481.53
0.617	1481.54
0.606	1481.54
0.652	1481.55
0.634	1481.55
0.607	1481.56
0.592	1481.56
0.629	1481.57
0.635	1481.57
0.595	1481.58
0.607	1481.58
0.638	1481.59
0.655	1481.59
0.627	1481.6
0.629	1481.6
0.639	1481.61
0.645	1481.61
0.601	1481.62
0.62	1481.62
0.613	1481.62
0.635	1481.63
0.596	1481.63
0.636	1481.64
0.609	1481.64
0.586	1481.65
0.609	1481.65
0.635	1481.66
0.675	1481.66
0.639	1481.67
0.645	1481.67
0.632	1481.68
0.664	1481.68
0.657	1481.69
0.654	1481.69
0.649	1481.7
0.631	1481.7
0.627	1481.71
0.657	1481.71
0.666	1481.72
0.649	1481.73
0.636	1481.73
0.611	1481.74
0.623	1481.74
0.597	1481.75
0.634	1481.75
0.622	1481.76
0.648	1481.76
0.646	1481.77
0.64	1481.77
0.642	1481.78
0.634	1481.78
0.67	1481.79
0.629	1481.79
0.619	1481.8
0.64	1481.8
0.59	1481.81
0.644	1481.81
0.65	1481.82
0.685	1481.82
0.671	1481.83
0.616	1481.83
0.601	1481.84
0.618	1481.84
0.575	1481.85
0.594	1481.85
0.657	1481.86
0.647	1481.86
0.624	1481.87
0.622	1481.87
0.66	1481.88
0.64	1481.88
0.66	1481.88
0.624	1481.89
0.652	1481.89
0.62	1481.9
0.637	1481.9
0.638	1481.91
0.653	1481.91
0.597	1481.92
0.622	1481.92
0.643	1481.93
0.643	1481.93
0.621	1481.94
0.622	1481.94
0.688	1481.95
0.661	1481.95
0.674	1481.96
0.659	1481.96
0.658	1481.97
0.616	1481.98
0.641	1481.98
0.648	1481.99
0.634	1481.99
0.636	1482
0.661	1482
0.644	1482.01
0.653	1482.01
0.646	1482.02
0.615	1482.02
0.643	1482.03
0.647	1482.03
0.626	1482.04
0.601	1482.04
0.622	1482.05
0.658	1482.05
0.62	1482.06
0.658	1482.06
0.676	1482.07
0.627	1482.07
0.632	1482.08
0.652	1482.08
0.628	1482.09
0.649	1482.09
0.608	1482.1
0.599	1482.1
0.602	1482.11
0.62	1482.11
0.6	1482.12
0.631	1482.12
0.582	1482.12
0.592	1482.13
0.626	1482.13
0.627	1482.14
0.586	1482.14
0.648	1482.15
0.627	1482.15
0.642	1482.16
0.661	1482.16
0.648	1482.17
0.654	1482.17
0.664	1482.18
0.683	1482.18
0.674	1482.19
0.645	1482.19
0.627	1482.2
0.616	1482.2
0.634	1482.21
0.643	1482.21
0.676	1482.22
0.639	1482.23
0.626	1482.23
0.63	1482.24
0.61	1482.24
0.639	1482.25
0.676	1482.25
0.64	1482.26
0.628	1482.26
0.656	1482.27
0.642	1482.27
0.628	1482.28
0.62	1482.28
0.663	1482.29
0.647	1482.29
0.644	1482.3
0.636	1482.3
0.632	1482.31
0.645	1482.31
0.624	1482.32
0.628	1482.32
0.622	1482.33
0.647	1482.33
0.648	1482.34
0.598	1482.34
0.648	1482.35
0.643	1482.35
0.647	1482.36
0.634	1482.36
0.653	1482.37
0.666	1482.37
0.584	1482.38
0.645	1482.38
0.603	1482.38
0.568	1482.39
0.592	1482.39
0.596	1482.4
0.608	1482.4
0.643	1482.41
0.662	1482.41
0.602	1482.42
0.592	1482.42
0.626	1482.43
0.633	1482.43
0.602	1482.44
0.614	1482.44
0.623	1482.45
0.65	1482.45
0.658	1482.46
0.625	1482.46
0.633	1482.47
0.63	1482.48
0.625	1482.48
0.645	1482.49
0.611	1482.49
0.663	1482.5
0.594	1482.5
0.6	1482.51
0.641	1482.51
0.633	1482.52
0.653	1482.52
0.643	1482.53
0.635	1482.53
0.613	1482.54
0.652	1482.54
0.606	1482.55
0.605	1482.55
0.6	1482.56
0.594	1482.56
0.631	1482.57
0.631	1482.57
0.625	1482.58
0.649	1482.58
0.598	1482.59
0.646	1482.59
0.629	1482.6
0.655	1482.6
0.659	1482.61
0.653	1482.61
0.628	1482.62
0.688	1482.62
0.653	1482.62
0.64	1482.63
0.661	1482.63
0.635	1482.64
0.638	1482.64
0.614	1482.65
0.617	1482.65
0.66	1482.66
0.614	1482.66
0.635	1482.67
0.619	1482.67
0.639	1482.68
0.63	1482.68
0.594	1482.69
0.679	1482.69
0.587	1482.7
0.617	1482.7
0.58	1482.71
0.586	1482.71
0.58	1482.72
0.63	1482.73
0.596	1482.73
0.649	1482.74
0.637	1482.74
0.642	1482.75
0.667	1482.75
0.651	1482.76
0.666	1482.76
0.66	1482.77
0.611	1482.77
0.652	1482.78
0.672	1482.78
0.669	1482.79
0.657	1482.79
0.651	1482.8
0.655	1482.8
0.666	1482.81
0.618	1482.81
0.581	1482.82
0.618	1482.82
0.643	1482.83
0.632	1482.83
0.591	1482.84
0.594	1482.84
0.566	1482.85
0.496	1482.85
0.393	1482.86
0.32	1482.86
0.31	1482.87
0.252	1482.87
0.215	1482.88
0.185	1482.88
0.133	1482.88
0.075	1482.89
0.113	1482.89
0.11	1482.9
0.096	1482.9
0.147	1482.91
0.148	1482.91
0.126	1482.92
0.149	1482.92
0.161	1482.93
0.152	1482.93
0.145	1482.94
0.189	1482.94
0.165	1482.95
0.193	1482.95
0.138	1482.96
0.16	1482.96
0.203	1482.97
0.171	1482.98
0.138	1482.98
0.089	1482.99
0.191	1482.99
0.177	1483
0.152	1483
0.14	1483.01
0.15	1483.01
0.142	1483.02
0.183	1483.02
0.111	1483.03
0.163	1483.03
0.143	1483.04
0.079	1483.04
0.117	1483.05
0.091	1483.05
-0.013	1483.06
0.031	1483.06
0.087	1483.07
0.073	1483.07
0.086	1483.08
0.112	1483.08
0.127	1483.09
0.141	1483.09
0.189	1483.1
0.196	1483.1
0.248	1483.11
0.244	1483.11
0.233	1483.12
0.244	1483.12
0.242	1483.12
0.228	1483.13
0.222	1483.13
0.203	1483.14
0.214	1483.14
0.181	1483.15
0.183	1483.15
0.213	1483.16
0.17	1483.16
0.2	1483.17
0.212	1483.17
0.186	1483.18
0.267	1483.18
0.249	1483.19
0.276	1483.19
0.241	1483.2
0.208	1483.2
0.213	1483.21
0.212	1483.21
0.218	1483.22
0.199	1483.23
0.176	1483.23
0.096	1483.24
0.094	1483.24
0.126	1483.25
0.18	1483.25
0.1	1483.26
0.112	1483.26
0.088	1483.27
0.071	1483.27
0.043	1483.28
0.035	1483.28
0.075	1483.29
0.061	1483.29
0.087	1483.3
0.14	1483.3
0.146	1483.31
0.11	1483.31
0.078	1483.32
0.085	1483.32
0.121	1483.33
0.172	1483.33
0.205	1483.34
0.227	1483.34
0.226	1483.35
0.237	1483.35
0.236	1483.36
0.163	1483.36
0.138	1483.37
0.075	1483.37
0.123	1483.38
0.131	1483.38
0.097	1483.38
0.162	1483.39
0.147	1483.39
0.105	1483.4
0.12	1483.4
0.115	1483.41
0.134	1483.41
0.202	1483.42
0.214	1483.42
0.177	1483.43
0.205	1483.43
0.164	1483.44
0.147	1483.44
0.174	1483.45
0.187	1483.45
0.19	1483.46
0.143	1483.46
0.167	1483.47
0.174	1483.48
0.207	1483.48
0.221	1483.49
0.119	1483.49
0.087	1483.5
0.111	1483.5
0.136	1483.51
0.153	1483.51
0.168	1483.52
0.175	1483.52
0.116	1483.53
0.075	1483.53
0.082	1483.54
0.154	1483.54
0.177	1483.55
0.158	1483.55
0.237	1483.56
0.229	1483.56
0.223	1483.57
0.235	1483.57
0.234	1483.58
0.173	1483.58
0.139	1483.59
0.177	1483.59
0.139	1483.6
0.219	1483.6
0.103	1483.61
0.156	1483.61
0.179	1483.62
0.224	1483.62
0.205	1483.62
0.172	1483.63
0.194	1483.63
0.185	1483.64
0.166	1483.64
0.167	1483.65
0.106	1483.65
0.105	1483.66
0.078	1483.66
0.151	1483.67
0.212	1483.67
0.229	1483.68
0.279	1483.68
0.257	1483.69
0.253	1483.69
0.251	1483.7
0.279	1483.7
0.289	1483.71
0.245	1483.71
0.222	1483.72
0.231	1483.73
0.177	1483.73
0.207	1483.74
0.253	1483.74
0.244	1483.75
0.198	1483.75
0.221	1483.76
0.224	1483.76
0.191	1483.77
0.209	1483.77
0.109	1483.78
0.138	1483.78
0.169	1483.79
0.175	1483.79
0.158	1483.8
0.093	1483.8
0.122	1483.81
0.153	1483.81
0.102	1483.82
0.151	1483.82
0.155	1483.83
0.195	1483.83
0.16	1483.84
0.181	1483.84
0.222	1483.85
0.233	1483.85
0.212	1483.86
0.189	1483.86
0.217	1483.87
0.222	1483.87
0.144	1483.88
0.141	1483.88
0.253	1483.88
0.263	1483.89
0.235	1483.89
0.225	1483.9
0.216	1483.9
0.14	1483.91
0.166	1483.91
0.206	1483.92
0.224	1483.92
0.166	1483.93
0.196	1483.93
0.224	1483.94
0.202	1483.94
0.142	1483.95
0.105	1483.95
0.116	1483.96
0.17	1483.96
0.07	1483.97
0.103	1483.98
0.105	1483.98
0.06	1483.99
0.049	1483.99
0.142	1484
0.174	1484
0.157	1484.01
0.157	1484.01
0.131	1484.02
0.16	1484.02
0.138	1484.03
0.152	1484.03
0.19	1484.04
0.172	1484.04
0.145	1484.05
0.172	1484.05
0.156	1484.06
0.173	1484.06
0.219	1484.07
0.233	1484.07
0.261	1484.08
0.236	1484.08
0.242	1484.09
0.242	1484.09
0.224	1484.1
0.181	1484.1
0.169	1484.11
0.193	1484.11
0.256	1484.12
0.186	1484.12
0.183	1484.12
0.205	1484.13
0.137	1484.13
0.188	1484.14
0.164	1484.14
0.162	1484.15
0.131	1484.15
0.071	1484.16
0.053	1484.16
0.09	1484.17
0.137	1484.17
0.084	1484.18
0.174	1484.18
0.168	1484.19
0.108	1484.19
0.079	1484.2
0.11	1484.2
0.207	1484.21
0.158	1484.21
0.218	1484.22
0.227	1484.23
0.121	1484.23
0.132	1484.24
0.133	1484.24
0.198	1484.25
0.176	1484.25
0.135	1484.26
0.085	1484.26
0.079	1484.27
0.143	1484.27
0.14	1484.28
0.138	1484.28
0.152	1484.29
0.133	1484.29
0.175	1484.3
0.145	1484.3
0.221	1484.31
0.238	1484.31
0.227	1484.32
0.197	1484.32
0.251	1484.33
0.24	1484.33
0.24	1484.34
0.235	1484.34
0.232	1484.35
0.162	1484.35
0.152	1484.36
0.138	1484.36
0.089	1484.37
0.066	1484.37
0.065	1484.38
0.073	1484.38
0.204	1484.38
0.132	1484.39
0.054	1484.39
0.139	1484.4
0.154	1484.4
0.13	1484.41
0.076	1484.41
0.1	1484.42
0.087	1484.42
0.078	1484.43
0.147	1484.43
0.14	1484.44
0.141	1484.44
0.124	1484.45
0.102	1484.45
0.161	1484.46
0.113	1484.46
0.141	1484.47
0.153	1484.48
0.125	1484.48
0.092	1484.49
0.17	1484.49
0.205	1484.5
0.218	1484.5
0.233	1484.51
0.19	1484.51
0.189	1484.52
0.148	1484.52
0.156	1484.53
0.187	1484.53
0.098	1484.54
0.136	1484.54
0.131	1484.55
0.133	1484.55
0.122	1484.56
0.155	1484.56
0.159	1484.57
0.182	1484.57
0.149	1484.58
0.143	1484.58
0.18	1484.59
0.145	1484.59
0.166	1484.6
0.216	1484.6
0.246	1484.61
0.264	1484.61
0.211	1484.62
0.139	1484.62
0.185	1484.62
0.192	1484.63
0.192	1484.63
0.164	1484.64
0.213	1484.64
0.17	1484.65
0.197	1484.65
0.219	1484.66
0.214	1484.66
0.221	1484.67
0.21	1484.67
0.188	1484.68
0.176	1484.68
0.208	1484.69
0.181	1484.69
0.139	1484.7
0.139	1484.7
0.151	1484.71
0.16	1484.71
0.204	1484.72
0.182	1484.73
0.221	1484.73
0.217	1484.74
0.213	1484.74
0.17	1484.75
0.217	1484.75
0.213	1484.76
0.181	1484.76
0.122	1484.77
0.108	1484.77
0.169	1484.78
0.22	1484.78
0.233	1484.79
0.259	1484.79
0.238	1484.8
0.199	1484.8
0.175	1484.81
0.246	1484.81
0.221	1484.82
0.19	1484.82
0.153	1484.83
0.164	1484.83
0.177	1484.84
0.183	1484.84
0.115	1484.85
0.149	1484.85
0.195	1484.86
0.174	1484.86
0.21	1484.87
0.212	1484.87
0.234	1484.88
0.201	1484.88
0.223	1484.88
0.198	1484.89
0.125	1484.89
0.153	1484.9
0.138	1484.9
0.04	1484.91
0.155	1484.91
0.144	1484.92
0.124	1484.92
0.167	1484.93
0.145	1484.93
0.159	1484.94
0.103	1484.94
0.226	1484.95
0.188	1484.95
0.144	1484.96
0.129	1484.96
0.167	1484.97
0.176	1484.98
0.25	1484.98
0.237	1484.99
0.159	1484.99
0.17	1485
0.175	1485
0.203	1485.01
0.148	1485.01
0.139	1485.02
0.146	1485.02
0.152	1485.03
0.17	1485.03
0.196	1485.04
0.145	1485.04
0.136	1485.05
0.126	1485.05
0.13	1485.06
0.214	1485.06
0.195	1485.07
0.127	1485.07
0.179	1485.08
0.173	1485.08
0.213	1485.09
0.25	1485.09
0.212	1485.1
0.255	1485.1
0.233	1485.11
0.199	1485.11
0.145	1485.12
0.129	1485.12
0.085	1485.12
0.115	1485.13
0.112	1485.13
0.106	1485.14
0.022	1485.14
0.113	1485.15
0.181	1485.15
0.152	1485.16
0.147	1485.16
0.176	1485.17
0.147	1485.17
0.149	1485.18
0.16	1485.18
0.186	1485.19
0.219	1485.19
0.222	1485.2
0.225	1485.2
0.183	1485.21
0.199	1485.21
0.193	1485.22
0.163	1485.23
0.142	1485.23
0.248	1485.24
0.222	1485.24
0.171	1485.25
0.16	1485.25
0.114	1485.26
0.116	1485.26
0.176	1485.27
0.162	1485.27
0.196	1485.28
0.149	1485.28
0.162	1485.29
0.194	1485.29
0.151	1485.3
0.126	1485.3
0.132	1485.31
0.169	1485.31
0.148	1485.32
0.16	1485.32
0.128	1485.33
0.077	1485.33
0.138	1485.34
0.161	1485.34
0.189	1485.35
0.135	1485.35
0.077	1485.36
0.116	1485.36
0.126	1485.37
0.107	1485.37
0.163	1485.38
0.124	1485.38
0.091	1485.38
0.07	1485.39
0.023	1485.39
0.13	1485.4
0.145	1485.4
0.103	1485.41
0.177	1485.41
0.147	1485.42
0.154	1485.42
0.195	1485.43
0.204	1485.43
0.199	1485.44
0.187	1485.44
0.224	1485.45
0.138	1485.45
0.12	1485.46
0.181	1485.46
0.263	1485.47
0.247	1485.48
0.251	1485.48
0.182	1485.49
0.239	1485.49
0.252	1485.5
0.189	1485.5
0.187	1485.51
0.179	1485.51
0.157	1485.52
0.15	1485.52
0.131	1485.53
0.183	1485.53
0.211	1485.54
0.208	1485.54
0.191	1485.55
0.224	1485.55
0.265	1485.56
0.275	1485.56
0.27	1485.57
0.28	1485.57
0.208	1485.58
0.237	1485.58
0.218	1485.59
0.246	1485.59
0.222	1485.6
0.185	1485.6
0.183	1485.61
0.19	1485.61
0.134	1485.62
0.086	1485.62
0.138	1485.62
0.156	1485.63
0.166	1485.63
0.171	1485.64
0.151	1485.64
0.237	1485.65
0.222	1485.65
0.274	1485.66
0.261	1485.66
0.214	1485.67
0.179	1485.67
0.15	1485.68
0.201	1485.68
0.195	1485.69
0.199	1485.69
0.105	1485.7
0.056	1485.7
0.089	1485.71
0.074	1485.71
0.081	1485.72
0.114	1485.73
0.108	1485.73
0.131	1485.74
0.112	1485.74
0.102	1485.75
0.088	1485.75
0.094	1485.76
0.09	1485.76
0.146	1485.77
0.136	1485.77
0.123	1485.78
0.121	1485.78
0.074	1485.79
0.073	1485.79
0.114	1485.8
0.167	1485.8
0.109	1485.81
0.051	1485.81
0.107	1485.82
0.114	1485.82
0.133	1485.83
0.113	1485.83
0.152	1485.84
0.203	1485.84
0.168	1485.85
0.18	1485.85
0.112	1485.86
0.14	1485.86
0.141	1485.87
0.052	1485.87
0.081	1485.88
0.078	1485.88
0.072	1485.88
0.122	1485.89
0.109	1485.89
0.113	1485.9
0.176	1485.9
0.187	1485.91
0.201	1485.91
0.166	1485.92
0.151	1485.92
0.16	1485.93
0.163	1485.93
0.231	1485.94
0.154	1485.94
0.166	1485.95
0.119	1485.95
0.181	1485.96
0.18	1485.96
0.18	1485.97
0.18	1485.98
0.209	1485.98
0.119	1485.99
0.106	1485.99
0.035	1486
0.028	1486
0.04	1486.01
0.087	1486.01
0.069	1486.02
0.077	1486.02
0.039	1486.03
0.066	1486.03
0.052	1486.04
0.174	1486.04
0.205	1486.05
0.198	1486.05
0.16	1486.06
0.193	1486.06
0.168	1486.07
0.202	1486.07
0.21	1486.08
0.19	1486.08
0.206	1486.09
0.141	1486.09
0.184	1486.1
0.196	1486.1
0.224	1486.11
0.235	1486.11
0.256	1486.12
0.218	1486.12
0.261	1486.12
0.258	1486.13
0.21	1486.13
0.202	1486.14
0.188	1486.14
0.222	1486.15
0.199	1486.15
0.209	1486.16
0.22	1486.16
0.219	1486.17
0.145	1486.17
0.15	1486.18
0.195	1486.18
0.136	1486.19
0.143	1486.19
0.167	1486.2
0.143	1486.2
0.164	1486.21
0.123	1486.21
0.157	1486.22
0.149	1486.23
0.179	1486.23
0.21	1486.24
0.222	1486.24
0.235	1486.25
0.235	1486.25
0.257	1486.26
0.257	1486.26
0.253	1486.27
0.239	1486.27
0.257	1486.28
0.239	1486.28
0.281	1486.29
0.263	1486.29
0.274	1486.3
0.224	1486.3
0.224	1486.31
0.259	1486.31
0.256	1486.32
0.265	1486.32
0.266	1486.33
0.188	1486.33
0.202	1486.34
0.222	1486.34
0.207	1486.35
0.228	1486.35
0.187	1486.36
0.237	1486.36
0.257	1486.37
0.253	1486.37
0.191	1486.38
0.204	1486.38
0.218	1486.38
0.206	1486.39
0.171	1486.39
0.188	1486.4
0.154	1486.4
0.177	1486.41
0.153	1486.41
0.14	1486.42
0.138	1486.42
0.13	1486.43
0.141	1486.43
0.175	1486.44
0.2	1486.44
0.202	1486.45
0.229	1486.45
0.157	1486.46
0.166	1486.46
0.126	1486.47
0.076	1486.48
0.084	1486.48
0.205	1486.49
0.233	1486.49
0.156	1486.5
0.193	1486.5
0.184	1486.51
0.203	1486.51
0.201	1486.52
0.248	1486.52
0.222	1486.53
0.165	1486.53
0.14	1486.54
0.206	1486.54
0.22	1486.55
0.2	1486.55
0.151	1486.56
0.164	1486.56
0.199	1486.57
0.182	1486.57
0.187	1486.58
0.212	1486.58
0.197	1486.59
0.237	1486.59
0.199	1486.6
0.19	1486.6
0.21	1486.61
0.227	1486.61
0.25	1486.62
0.227	1486.62
0.185	1486.62
0.206	1486.63
0.203	1486.63
0.202	1486.64
0.123	1486.64
0.168	1486.65
0.186	1486.65
0.119	1486.66
0.08	1486.66
0.083	1486.67
0.144	1486.67
0.146	1486.68
0.14	1486.68
0.095	1486.69
0.035	1486.69
0.083	1486.7
0.078	1486.7
0.154	1486.71
0.208	1486.71
0.196	1486.72
0.24	1486.73
0.207	1486.73
0.148	1486.74
0.131	1486.74
0.128	1486.75
0.098	1486.75
0.134	1486.76
0.097	1486.76
0.106	1486.77
0.056	1486.77
0.078	1486.78
0.071	1486.78
0.121	1486.79
0.16	1486.79
0.152	1486.8
0.173	1486.8
0.227	1486.81
0.206	1486.81
0.202	1486.82
0.167	1486.82
0.212	1486.83
0.195	1486.83
0.23	1486.84
0.23	1486.84
0.215	1486.85
0.215	1486.85
0.148	1486.86
0.123	1486.86
0.171	1486.87
0.228	1486.87
0.18	1486.88
0.176	1486.88
0.122	1486.88
0.107	1486.89
0.098	1486.89
0.077	1486.9
0.099	1486.9
0.053	1486.91
0.118	1486.91
0.219	1486.92
0.192	1486.92
0.244	1486.93
0.137	1486.93
0.122	1486.94
0.142	1486.94
0.149	1486.95
0.212	1486.95
0.098	1486.96
0.064	1486.96
0.046	1486.97
0.032	1486.98
0.029	1486.98
0.122	1486.99
0.176	1486.99
0.221	1487
0.143	1487
0.154	1487.01
0.151	1487.01
0.124	1487.02
0.163	1487.02
0.207	1487.03
0.222	1487.03
0.125	1487.04
0.117	1487.04
0.197	1487.05
0.214	1487.05
0.144	1487.06
0.174	1487.06
0.161	1487.07
0.111	1487.07
0.101	1487.08
0.14	1487.08
0.181	1487.09
0.219	1487.09
0.218	1487.1
0.166	1487.1
0.217	1487.11
0.202	1487.11
0.227	1487.12
0.224	1487.12
0.248	1487.12
0.236	1487.13
0.219	1487.13
0.208	1487.14
0.233	1487.14
0.21	1487.15
0.177	1487.15
0.175	1487.16
0.183	1487.16
0.189	1487.17
0.233	1487.17
0.233	1487.18
0.235	1487.18
0.208	1487.19
0.185	1487.19
0.122	1487.2
0.126	1487.2
0.195	1487.21
0.186	1487.21
0.168	1487.22
0.183	1487.23
0.152	1487.23
0.153	1487.24
0.171	1487.24
0.206	1487.25
0.185	1487.25
0.16	1487.26
0.107	1487.26
0.113	1487.27
0.07	1487.27
0.157	1487.28
0.139	1487.28
0.178	1487.29
0.174	1487.29
0.151	1487.3
0.143	1487.3
0.152	1487.31
0.181	1487.31
0.206	1487.32
0.221	1487.32
0.201	1487.33
0.195	1487.33
0.188	1487.34
0.15	1487.34
0.187	1487.35
0.194	1487.35
0.186	1487.36
0.224	1487.36
0.244	1487.37
0.202	1487.37
0.205	1487.38
0.21	1487.38
0.191	1487.38
0.229	1487.39
0.202	1487.39
0.207	1487.4
0.212	1487.4
0.238	1487.41
0.208	1487.41
0.164	1487.42
0.181	1487.42
0.162	1487.43
0.102	1487.43
0.121	1487.44
0.111	1487.44
0.13	1487.45
0.15	1487.45
0.193	1487.46
0.119	1487.46
0.137	1487.47
0.088	1487.48
0.064	1487.48
0.134	1487.49
0.198	1487.49
0.183	1487.5
0.223	1487.5
0.202	1487.51
0.221	1487.51
0.237	1487.52
0.216	1487.52
0.159	1487.53
0.158	1487.53
0.226	1487.54
0.218	1487.54
0.187	1487.55
0.16	1487.55
0.188	1487.56
0.233	1487.56
0.19	1487.57
0.188	1487.57
0.207	1487.58
0.107	1487.58
0.072	1487.59
0.16	1487.59
0.092	1487.6
0.185	1487.6
0.199	1487.61
0.156	1487.61
0.173	1487.62
0.169	1487.62
0.219	1487.62
0.228	1487.63
0.224	1487.63
0.168	1487.64
0.136	1487.64
0.045	1487.65
0.049	1487.65
0.063	1487.66
0.048	1487.66
0.081	1487.67
0.11	1487.67
0.087	1487.68
0.055	1487.68
0.03	1487.69
-0.002	1487.69
0.014	1487.7
0.151	1487.7
0.176	1487.71
0.157	1487.71
0.128	1487.72
0.114	1487.73
0.037	1487.73
0.087	1487.74
0.122	1487.74
0.085	1487.75
0.097	1487.75
0.09	1487.76
0.103	1487.76
0.155	1487.77
0.228	1487.77
0.201	1487.78
0.161	1487.78
0.197	1487.79
0.245	1487.79
0.241	1487.8
0.197	1487.8
0.209	1487.81
0.193	1487.81
0.149	1487.82
0.119	1487.82
0.104	1487.83
0.083	1487.83
0.111	1487.84
0.082	1487.84
0.099	1487.85
0.078	1487.85
0.042	1487.86
0.076	1487.86
0.096	1487.87
0.114	1487.87
0.091	1487.88
0.077	1487.88
0.057	1487.88
0.135	1487.89
0.211	1487.89
0.14	1487.9
0.15	1487.9
0.152	1487.91
0.08	1487.91
0.073	1487.92
0.166	1487.92
0.155	1487.93
0.151	1487.93
0.2	1487.94
0.116	1487.94
0.06	1487.95
0.084	1487.95
0.047	1487.96
0.055	1487.96
0.052	1487.97
0.065	1487.98
0.073	1487.98
0.062	1487.99
0.002	1487.99
0.014	1488
0.105	1488
0.1	1488.01
0.125	1488.01
0.159	1488.02
0.171	1488.02
0.203	1488.03
0.117	1488.03
0.138	1488.04
0.114	1488.04
0.047	1488.05
0.054	1488.05
0.174	1488.06
0.12	1488.06
0.093	1488.07
0.193	1488.07
0.158	1488.08
0.164	1488.08
0.184	1488.09
0.176	1488.09
0.165	1488.1
0.155	1488.1
0.148	1488.11
0.187	1488.11
0.166	1488.12
0.203	1488.12
0.236	1488.12
0.198	1488.13
0.15	1488.13
0.19	1488.14
0.223	1488.14
0.192	1488.15
0.232	1488.15
0.217	1488.16
0.192	1488.16
0.218	1488.17
0.162	1488.17
0.149	1488.18
0.143	1488.18
0.121	1488.19
0.147	1488.19
0.134	1488.2
0.136	1488.2
0.187	1488.21
0.179	1488.21
0.19	1488.22
0.124	1488.23
0.193	1488.23
0.138	1488.24
0.211	1488.24
0.27	1488.25
0.222	1488.25
0.204	1488.26
0.19	1488.26
0.193	1488.27
0.205	1488.27
0.18	1488.28
0.187	1488.28
0.191	1488.29
0.222	1488.29
0.21	1488.3
0.232	1488.3
0.218	1488.31
0.215	1488.31
0.248	1488.32
0.216	1488.32
0.222	1488.33
0.24	1488.33
0.222	1488.34
0.23	1488.34
0.206	1488.35
0.207	1488.35
0.181	1488.36
0.248	1488.36
0.195	1488.37
0.22	1488.37
0.221	1488.38
0.223	1488.38
0.203	1488.38
0.26	1488.39
0.219	1488.39
0.207	1488.4
0.231	1488.4
0.26	1488.41
0.235	1488.41
0.218	1488.42
0.201	1488.42
0.206	1488.43
0.229	1488.43
0.245	1488.44
0.222	1488.44
0.178	1488.45
0.144	1488.45
0.129	1488.46
0.196	1488.46
0.175	1488.47
0.195	1488.48
0.16	1488.48
0.221	1488.49
0.118	1488.49
0.089	1488.5
0.121	1488.5
0.129	1488.51
0.131	1488.51
0.161	1488.52
0.118	1488.52
0.128	1488.53
0.126	1488.53
0.164	1488.54
0.194	1488.54
0.205	1488.55
0.211	1488.55
0.154	1488.56
0.118	1488.56
0.079	1488.57
0.087	1488.57
0.083	1488.58
0.196	1488.58
0.189	1488.59
0.208	1488.59
0.208	1488.6
0.154	1488.6
0.128	1488.61
0.088	1488.61
0.065	1488.62
0.083	1488.62
0.032	1488.62
0.04	1488.63
0.076	1488.63
0.123	1488.64
0.125	1488.64
0.179	1488.65
0.212	1488.65
0.141	1488.66
0.156	1488.66
0.132	1488.67
0.07	1488.67
0.058	1488.68
0.101	1488.68
0.119	1488.69
0.133	1488.69
0.067	1488.7
0.09	1488.7
0.171	1488.71
0.121	1488.71
0.178	1488.72
0.112	1488.73
0.117	1488.73
0.148	1488.74
0.069	1488.74
0.079	1488.75
0.082	1488.75
0.139	1488.76
0.11	1488.76
0.079	1488.77
0.175	1488.77
0.164	1488.78
0.184	1488.78
0.217	1488.79
0.154	1488.79
0.156	1488.8
0.206	1488.8
0.246	1488.81
0.207	1488.81
0.217	1488.82
0.265	1488.82
0.261	1488.83
0.252	1488.83
0.19	1488.84
0.193	1488.84
0.237	1488.85
0.189	1488.85
0.221	1488.86
0.167	1488.86
0.134	1488.87
0.155	1488.87
0.145	1488.88
0.156	1488.88
0.193	1488.88
0.186	1488.89
0.148	1488.89
0.115	1488.9
0.155	1488.9
0.119	1488.91
0.168	1488.91
0.164	1488.92
0.147	1488.92
0.155	1488.93
0.143	1488.93
0.21	1488.94
0.193	1488.94
0.197	1488.95
0.182	1488.95
0.22	1488.96
0.202	1488.96
0.208	1488.97
0.136	1488.98
0.12	1488.98
0.18	1488.99
0.225	1488.99
0.215	1489
0.177	1489
0.193	1489.01
0.181	1489.01
0.097	1489.02
0.174	1489.02
0.178	1489.03
0.196	1489.03
0.175	1489.04
0.142	1489.04
0.156	1489.05
0.198	1489.05
0.187	1489.06
0.163	1489.06
0.131	1489.07
0.107	1489.07
0.139	1489.08
0.18	1489.08
0.187	1489.09
0.189	1489.09
0.241	1489.1
0.19	1489.1
0.21	1489.11
0.247	1489.11
0.267	1489.12
0.232	1489.12
0.202	1489.12
0.191	1489.13
0.144	1489.13
0.167	1489.14
0.19	1489.14
0.203	1489.15
0.256	1489.15
0.237	1489.16
0.216	1489.16
0.191	1489.17
0.151	1489.17
0.178	1489.18
0.151	1489.18
0.184	1489.19
0.203	1489.19
0.138	1489.2
0.118	1489.2
0.114	1489.21
0.127	1489.21
0.189	1489.22
0.185	1489.23
0.18	1489.23
0.184	1489.24
0.218	1489.24
0.195	1489.25
0.203	1489.25
0.264	1489.26
0.2	1489.26
0.269	1489.27
0.246	1489.27
0.186	1489.28
0.215	1489.28
0.157	1489.29
0.204	1489.29
0.212	1489.3
0.207	1489.3
0.216	1489.31
0.184	1489.31
0.22	1489.32
0.17	1489.32
0.115	1489.33
0.128	1489.33
0.101	1489.34
0.126	1489.34
0.172	1489.35
0.14	1489.35
0.11	1489.36
0.148	1489.36
0.186	1489.37
0.214	1489.37
0.198	1489.38
0.13	1489.38
0.185	1489.38
0.164	1489.39
0.088	1489.39
0.13	1489.4
0.148	1489.4
0.105	1489.41
0.139	1489.41
0.116	1489.42
0.16	1489.42
0.127	1489.43
0.109	1489.43
0.125	1489.44
0.188	1489.44
0.216	1489.45
0.219	1489.45
0.194	1489.46
0.246	1489.46
0.233	1489.47
0.201	1489.48
0.125	1489.48
0.106	1489.49
0.074	1489.49
0.169	1489.5
0.188	1489.5
0.208	1489.51
0.125	1489.51
0.209	1489.52
0.246	1489.52
0.198	1489.53
0.171	1489.53
0.135	1489.54
0.136	1489.54
0.105	1489.55
0.042	1489.55
0.108	1489.56
0.143	1489.56
0.105	1489.57
0.166	1489.57
0.097	1489.58
0.121	1489.58
0.129	1489.59
0.165	1489.59
0.121	1489.6
0.177	1489.6
0.187	1489.61
0.209	1489.61
0.183	1489.62
0.207	1489.62
0.16	1489.62
0.181	1489.63
0.145	1489.63
0.178	1489.64
0.207	1489.64
0.238	1489.65
0.272	1489.65
0.241	1489.66
0.22	1489.66
0.168	1489.67
0.177	1489.67
0.231	1489.68
0.281	1489.68
0.169	1489.69
0.104	1489.69
0.204	1489.7
0.161	1489.7
0.112	1489.71
0.048	1489.71
0.138	1489.72
0.162	1489.73
0.111	1489.73
0.193	1489.74
0.197	1489.74
0.21	1489.75
0.198	1489.75
0.252	1489.76
0.22	1489.76
0.208	1489.77
0.249	1489.77
0.189	1489.78
0.213	1489.78
0.159	1489.79
0.099	1489.79
0.042	1489.8
0.009	1489.8
0.022	1489.81
0.089	1489.81
0.098	1489.82
0.166	1489.82
0.139	1489.83
0.161	1489.83
0.123	1489.84
0.148	1489.84
0.151	1489.85
0.189	1489.85
0.264	1489.86
0.21	1489.86
0.239	1489.87
0.253	1489.87
0.218	1489.88
0.205	1489.88
0.18	1489.88
0.224	1489.89
0.212	1489.89
0.248	1489.9
0.194	1489.9
0.082	1489.91
0.041	1489.91
0.07	1489.92
0.054	1489.92
0.063	1489.93
0.058	1489.93
0.118	1489.94
0.138	1489.94
0.093	1489.95
0.158	1489.95
0.109	1489.96
0.136	1489.96
0.16	1489.97
0.108	1489.98
0.113	1489.98
0.229	1489.99
0.229	1489.99
0.207	1490
0.249	1490
0.241	1490.01
0.231	1490.01
[truncated: 82,164 more rows]
