# Supplementary material for: Topoisomerase VI is a chirally-selective, preferential DNA decatenase
Source: eLife. 2022 Jan 25;11:e67021. doi: 10.7554/eLife.67021 (PMC8837201; doi:10.7554/eLife.67021)
Supplement: Figure 8—figure supplement 1—source data 1. [file elife-67021-fig8-figsupp1-data1.csv]

Crossing anlge (deg)	Probability ratio (?=-0.05)/(?=+0.05)	Probability ratio (?=-0.06)/(?=+0.05)	Probability ratio (?=-0.06)/(?=+0.06)
0
0.904522613	0	0	0
1.809045226	0	0	0
2.713567839	0	0	0
3.618090452	0	0	0
4.522613065	0	0	0
5.427135678	0	0	0
6.331658291	0	0	0
7.236180905	0	0	0
8.140703518	0	0	0
9.045226131	0	0	0
9.949748744	0	0	0
10.85427136	0	0	0
11.75879397	0	0	0
12.66331658	0	0	0
13.5678392	0	0	0
14.47236181	0	0	0
15.37688442	0	0	0
16.28140704	0	0	0
17.18592965	0	0	0
18.09045226	0	0	0
18.99497487	0	0	0
19.89949749	0	0	0
20.8040201	0	0	0
21.70854271	0	0	0
22.61306533	0	0	0
23.51758794	0	0	0
24.42211055	0	0	0
25.32663317	0	0	0
26.23115578	0	0	0
27.13567839	0	0	0
28.04020101	0	0	0
28.94472362	0	0	0
29.84924623	0	0	0
30.75376884	0	0	0
31.65829146	0	0	0
32.56281407	0	0.000189363	0.000170397
33.46733668	0.002506389	0.000466888	0.000422669
34.3718593	0.00695572	0.000713486	0.000647587
35.27638191	0.010944309	0.000934549	0.000841544
36.18090452	0.014540201	0.001133847	0.001017392
37.08542714	0.017798668	0.001314443	0.001184976
37.98994975	0.020765077	0.001478852	0.001319615
38.89447236	0.023445657	0.001629158	0.001444814
39.79899497	0.023785864	0.001786803	0.00155586
40.70351759	0.024110082	0.001935466	0.001662131
41.6080402	0.024415798	0.002320934	0.001978422
42.51256281	0.024704551	0.002902258	0.002466595
43.41708543	0.024977715	0.003452197	0.002896623
44.32160804	0.025236519	0.003973227	0.003299429
45.22613065	0.025877265	0.004467569	0.003723123
46.13065327	0.026628348	0.004937221	0.004109675
47.03517588	0.027342832	0.005383989	0.004485846
47.93969849	0.02802333	0.005809506	0.004862775
48.84422111	0.028672211	0.006215251	0.005245399
49.74874372	0.029291628	0.006602573	0.005636977
50.65326633	0.029883542	0.007466002	0.006438774
51.55778894	0.03098415	0.009410842	0.008086354
52.46231156	0.032609188	0.011393838	0.009686403
53.36683417	0.034221738	0.012077609	0.010201971
54.27135678	0.035821944	0.012448909	0.01052286
55.1758794	0.037409947	0.012817377	0.010841739
56.08040201	0.038985886	0.013814793	0.011745348
56.98492462	0.04056092	0.01507235	0.012961295
57.88944724	0.043898131	0.016418716	0.014195931
58.79396985	0.047605067	0.01786349	0.015414262
59.69849246	0.051385084	0.019171888	0.016650909
60.60301508	0.055240363	0.020506337	0.01800664
61.50753769	0.059173175	0.021867623	0.01944899
62.4120603	0.063185883	0.023256563	0.020977013
63.31658291	0.068134575	0.024728703	0.022746771
64.22110553	0.074579376	0.026398451	0.024514217
65.12562814	0.081271782	0.029134643	0.027246178
66.03015075	0.088226342	0.032246317	0.030176444
66.93467337	0.095458765	0.035482316	0.033227971
67.83919598	0.102986045	0.03882053	0.036886166
68.74371859	0.110826588	0.042223246	0.041274646
69.64824121	0.121063223	0.045957153	0.045322873
70.55276382	0.132534093	0.049969866	0.049243709
71.45728643	0.144661114	0.056481	0.056380816
72.36180905	0.157502243	0.063831509	0.064095858
73.26633166	0.171122471	0.071627989	0.072245145
74.17085427	0.185594919	0.079911325	0.082018988
75.07537688	0.201664264	0.088742631	0.093611109
75.9798995	0.224684052	0.098404976	0.104402661
76.88442211	0.24942619	0.108920965	0.115774882
77.78894472	0.27609149	0.12640983	0.139182006
78.69346734	0.304913244	0.14531304	0.162681655
79.59798995	0.336164069	0.165809395	0.189070108
80.50251256	0.370164553	0.190089485	0.220517746
81.40703518	0.40791617	0.216271338	0.256367075
82.31155779	0.448082475	0.243666194	0.296592406
83.2160804	0.491580545	0.280558342	0.346051583
84.12060302	0.538842871	0.327157773	0.409461681
85.02512563	0.590380179	0.377972225	0.480767047
85.92964824	0.646799967	0.427560183	0.551935563
86.83417085	0.709758145	0.477926452	0.626440085
87.73869347	0.783903335	0.529125461	0.71744063
88.64321608	0.864485139	0.58656043	0.824890004
89.54773869	0.952691372	0.657778943	0.938011747
90.45226131	1.049657874	0.736070576	1.06608473
91.35678392	1.156757884	0.822544095	1.212282844
92.26130653	1.275667491	0.940827884	1.393843558
93.16582915	1.408930643	1.074907623	1.596321857
94.07035176	1.546073054	1.197674733	1.811805702
94.97487437	1.693823803	1.331660223	2.08000945
95.87939698	1.85582858	1.482797471	2.442230976
96.7839196	2.034254629	1.649254427	2.889742593
97.68844221	2.231732005	1.833484718	3.37163049
98.59296482	2.451484087	2.068072676	3.900656894
99.49748744	2.701501239	2.328733122	4.534782422
100.4020101	2.97473791	2.608765067	5.289043362
101.3065327	3.279621397	2.929474468	6.146974592
102.2110553	3.62198777	3.289612419	7.184836788
103.1155779	4.009202078	3.771855796	8.637452155
104.0201005	4.450694161	4.195012343	9.578299908
104.9246231	4.958736769	4.700845377	10.68249285
105.8291457	5.388078544	5.24961973	12.19229868
106.7336683	5.843767886	5.793847301	13.84176053
107.638191	6.349115912	6.322930379	15.60163209
108.5427136	6.912707726	6.924991049	17.73652942
109.4472362	7.545228393	7.656491797	20.30716263
110.3517588	8.260146846	8.375745016	22.06391456
111.2562814	9.023105575	9.230480234	24.22794856
112.160804	9.710053464	10.21926273	27.11043511
113.0653266	10.47572741	11.18645095	30.09512675
113.9698492	11.33448336	12.11194219	33.13843107
114.8743719	12.30439361	13.15722572	36.70239589
115.7788945	13.40853262	14.43915113	40.79265502
116.6834171	14.67683633	15.95563272	43.96228419
117.5879397	15.82632003	17.54614981	47.67122991
118.4924623	16.89954945	19.0011392	51.41655129
119.3969849	18.10270503	20.61573776	55.53506953
120.3015075	19.46090036	22.4073177	60.05678252
121.2060302	21.00616712	24.34391302	64.87498342
122.1105528	22.78001337	26.34688575	70.44271937
123.0150754	24.654273	28.66980666	77.15278168
123.919598	25.65030843	30.16970643	85.14009026
124.8241206	26.73085867	31.60189354	92.23612197
125.7286432	27.91584981	33.02542005	95.03119847
126.6331658	29.22119296	34.59352509	98.02027088
127.5376884	30.66620408	36.07177567	103.2374945
128.4422111	32.2745663	37.56090993	123.6651207
129.3467337	33.46323507	38.80188546	155.3090614
130.2512563	34.13944805	39.98742538	177.4000412
131.1557789	34.87697531	41.32558105	190.6432568
132.0603015	35.6845522	42.63195543	205.6438938
132.9648241	36.57265617	43.89512512	222.9233669
133.8693467	37.55396379	45.11603262	243.3282423
134.7738693	38.64395975	46.37089034	268.591683
135.678392	39.62511698	47.71722326	303.0827354
136.5829146	40.03568834	47.71456103	345.2295975
137.4874372	40.47837192	47.62786794	405.4171586
138.3919598	40.95708846	48.04772756	505.4532852
139.2964824	41.47642404	48.29714461	601.6371316
140.201005	42.0417775	48.28223834	642.731472
141.1055276	42.65182181	48.09377478	692.1307628
142.0100503	48.15777994	53.96893865	757.7965137
142.9145729	56.18397911	62.3224679	843.8988755
143.8190955	68.7748413	76.64703947	982.9049017
144.7236181	91.3716867	101.4698294	1188.292262
145.6281407	143.76657	158.3963884	1544.193272
146.5326633	398.9803563	440.7213292	2365.919146
