# Supplementary material for: Topoisomerase VI is a chirally-selective, preferential DNA decatenase
Source: eLife. 2022 Jan 25;11:e67021. doi: 10.7554/eLife.67021 (PMC8837201; doi:10.7554/eLife.67021)
Supplement: Figure 8—figure supplement 2—source data 1. [file elife-67021-fig8-figsupp2-data1.csv]

Crossing angle (deg)	May1_F1pN_Hist	May3_F1pN_Hist	May3_F1_5pN_Hist	may14_f0_7pN_Hist	May14_F1pN_Hist	may14_f1_5pN_Hist	May16_F0_5pN_Hist	May16_F0_7pN_Hist	May16_F1pN_Hist	May16_F1_5pN_Hist	May16_F1_7pN_Hist	May16_F2_0pN_Hist	May16_F2_2pN_Hist	'Non_relaxed F1pN_Hist'	Non_relaxed_F1_5pN_Hist
0.5	0	0	0	0	0	0	0	0	0	0	0	0	0	0	0
1.5	0	0	0	0	0	0	0	0	0	0	0	0	0	0	0
2.5	0	0	0	0	0	0	0	0	0	0	0	0	0	0	0
3.5	0	0	0	0	0	0	0	0	0	0	0	0	0	0	0
4.5	0	0	0	0	0	0	0	0	0	0	0	0	0	0	0
5.5	0	0	0	0	0	0	0	0	0	0	0	0	0	0	0
6.5	0	0	0	0	0	0	0	0	0	0	0	0	0	0	0
7.5	0	0	0	0	0	0	0	0	0	0	0	0	0	0	0
8.5	0	0	0	0	0	0	0	0	0	0	0	0	0	0	0
9.5	0	0	0	0	0	0	0	0	0	0	0	0	0	0	0
10.5	0	0	0	0	0	0	0	0	0	0	0	0	0	0	0
11.5	0	0	0	0	0	0	0	0	0	0	0	0	0	0	0
12.5	0	0	0	0	0	0	0	0	0	0	0	0	0	0	0
13.5	0	0	0	0	0	0	0	0	0	0	0	0	0	0	0
14.5	0	0	0	0	0	0	0	0	0	0	0	0	0	0	0
15.5	0	0	0	0	0	0	0	0	0	0	0	0	0	0	0
16.5	0	0	0	0	0	0	0	0	0	0	0	0	0	0	0
17.5	0	0	0	0	0	0	0	0	0	0	0	0	0	0	0
18.5	0	0	0	0	0	0	0	0	0	0	0	0	0	0	0
19.5	0	0	0	0	0	0	0	0	0	0	0	0	0	0	0
20.5	0	0	0	0	0	0	0	0	0	0	0	0	0	0	0
21.5	0	0	0	0	0	0	0	0	0	0	0	0	0	0	0
22.5	0	0	0	0	0	0	0	0	0	0	0	0	0	0	0
23.5	0	0	0	0	0	0	0	0	0	0	0	0	0	0	0
24.5	0	0	0	0	0	0	0	0	0	0	0	0	0	0	0
25.5	0	0	0	0	0	0	0	0	0	0	0	0	0	0	0
26.5	0	0	0	0	0	0	0	0	0	0	0	0	0	0	0
27.5	0	0	0	0	0	0	0	0	0	0	0	0	0	0	0
28.5	0	0	0	0	0	0	0	0	0	0	0	0	0	0	0
29.5	0	0	0	0	0	0	0	0	0	0	0	0	0	0	0
30.5	0	0	0	0	0	0	0	0	0	0	0	0	0	0	0
31.5	0	0	0	0	0	0	0	0	0	0	0	0	0	0	0
32.5	0	0	0	0	0	0	0	0	0	0	0	0	0	0	0
33.5	0	0	0	0	0	0	0	0	0	0	0	0	0	2.00E-06	2.00E-06
34.5	0	0	0	0	0	0	0	0	0	0	0	0	0	0	2.00E-06
35.5	0	0	0	0	0	0	0	0	0	0	0	0	0	0	2.00E-06
36.5	0	0	0	0	0	0	0	0	0	0	0	0	0	1.20E-05	2.20E-05
37.5	0	0	0	0	0	0	0	0	0	0	0	0	0	1.40E-05	4.80E-05
38.5	0	0	0	0	0	0	0	0	0	0	0	0	0	1.60E-05	0.000116
39.5	0	0	0	0	0	0	0	0	0	0	0	0	0	5.20E-05	0.000178
40.5	0	0	0	0	0	0	0	0	0	0	0	1.00E-05	0	0.000118	0.000346
41.5	0	0	0	0	0	0	0	1.00E-05	0	0	0	0	1.00E-05	0.000218	0.000748
42.5	0	0	0	0	0	0	0	0	0	0	0	0	0	0.000384	0.001162
43.5	0	0	0	0	0	0	0	0	0	0	0	0	0	0.00068	0.002008
44.5	0	0	0	0	0	0	1.00E-05	0	0	0	0	0	0	0.0011	0.003044
45.5	0	0	0	0	0	0	0	1.00E-05	0	0	0	0	0	0.00173	0.004476
46.5	0	0	0	0	0	0	1.00E-05	0	1.00E-05	0	0	0	0	0.002578	0.006378
47.5	0	0	0	0	0	0	1.00E-05	0	0	0	1.00E-05	1.00E-05	0	0.003732	0.008848
48.5	0	0	0	0	0	0	1.00E-05	0	0	1.00E-05	1.00E-05	1.00E-05	1.00E-05	0.005136	0.011738
49.5	0	0	0	0	0	0	4.00E-05	4.00E-05	5.00E-05	1.00E-05	2.00E-05	4.00E-05	1.00E-05	0.00687	0.015416
50.5	0	0	0	0	0	0	1.00E-05	2.00E-05	4.00E-05	3.00E-05	4.00E-05	5.00E-05	1.00E-05	0.009074	0.019826001
51.5	0	0	0	0	0	0	5.00E-05	1.00E-05	0.00011	5.00E-05	3.00E-05	3.00E-05	1.00E-04	0.011622	0.023776
52.5	0	0	0	0	0	0	0.00014	4.00E-05	7.00E-05	6.00E-05	6.00E-05	1.00E-04	8.00E-05	0.014456	0.028174
53.5	1.00E-05	0	0	0	0	0	7.00E-05	9.00E-05	0.00015	0.00024	0.00035	0.00012	0.00024	0.018082	0.032292001
54.5	0	0	1.00E-05	0	0	0	0.00013	0.00017	0.00027	0.00028	0.00027	0.00024	0.00023	0.021046	0.036835998
55.5	0	1.00E-05	1.00E-05	0	0	2.00E-05	0.00022	0.00024	0.00033	0.00041	0.00046	0.00028	0.00045	0.024494	0.040410001
56.5	1.00E-05	1.00E-05	2.00E-05	0	0	1.00E-05	0.00033	0.00034	0.00048	0.00077	0.00074	0.00072	0.00066	0.027753999	0.043922
5.75E+01	5.00E-05	1.00E-05	2.00E-05	0	1.00E-05	1.00E-05	0.00037	0.0006	0.00074	0.00102	0.0012	0.00103	0.00103	0.031204	0.047324002
58.5	3.00E-05	1.00E-05	6.00E-05	0	0	1.00E-05	0.0005	0.00076	0.00124	0.00142	0.00162	0.00168	0.00156	0.034634002	0.049352001
59.5	0.00011	4.00E-05	2.00E-05	0	1.00E-05	1.00E-05	0.00073	0.00095	0.00161	0.0019	0.00229	0.00221	0.00275	0.037602	0.050701998
6.05E+01	0.00039	4.00E-05	4.00E-05	0	2.00E-05	2.00E-05	0.00108	0.00162	0.00211	0.00277	0.0031	0.00315	0.0033	0.039726	0.050728001
6.15E+01	0.00052	5.00E-05	0.00016	0	1.00E-05	1.00E-05	0.00138	0.00204	0.00275	0.00406	0.00441	0.00445	0.00458	0.041986	0.050285999
62.5	0.00097	0.00014	0.00026	1.00E-05	1.00E-05	3.00E-05	0.0019	0.00252	0.00359	0.00509	0.00596	0.00625	0.00695	0.043839999	0.049477998
6.35E+01	0.00154	0.00015	0.0003	1.00E-05	2.00E-05	3.00E-05	0.0024	0.00342	0.00508	0.00682	0.00739	0.0083	0.00919	0.044916	0.047897998
6.45E+01	0.00228	0.00046	0.00075	1.00E-05	6.00E-05	1.00E-04	0.00283	0.00468	0.0064	0.00949	0.00964	0.01138	0.01184	0.045056	0.046055999
6.55E+01	0.00379	0.00083	0.00126	4.00E-05	0.00014	0.00024	0.00391	0.00564	0.00861	0.01219	0.01271	0.01417	0.01401	0.045712002	0.043248001
6.65E+01	0.00625	0.00129	0.00273	8.00E-05	0.00011	0.00041	0.0049	0.00749	0.01061	0.01534	0.01528	0.01723	0.0175	0.044514	0.039646
67.5	0.00952	0.00217	0.00527	0.00011	0.00021	0.00088	0.00597	0.00873	0.01272	0.01787	0.01952	0.02165	0.023019999	0.043437999	0.036556002
68.5	0.01334	0.00411	0.00875	0.00012	0.0007	0.00163	0.00688	0.01108	0.01479	0.022299999	0.023940001	0.02713	0.026869999	0.041889999	0.033004001
69.5	0.01873	0.00648	0.01469	0.0004	0.00127	0.00328	0.00884	0.01297	0.018920001	0.02558	0.02784	0.03012	0.031720001	0.039689999	0.028918
70.5	0.02602	0.00992	0.020880001	0.00092	0.00223	0.00575	0.01034	0.015699999	0.02163	0.029209999	0.032120001	0.034869999	0.03627	0.037684001	0.025235999
71.5	0.034630001	0.01556	0.030470001	0.0015	0.0046	0.00948	0.01215	0.01873	0.024490001	0.032729998	0.03706	0.039409999	0.04095	0.035117999	0.021754
72.5	0.043710001	0.02214	0.042660002	0.00265	0.00701	0.017550001	0.014	0.02132	0.02894	0.037179999	0.039859999	0.042970002	0.04524	0.032030001	0.019098001
73.5	0.051309999	0.030680001	0.053819999	0.00446	0.01196	0.02623	0.016589999	0.02441	0.03241	0.04245	0.044130001	0.04741	0.049830001	0.029142	0.015893999
74.5	0.06072	0.039960001	0.068170004	0.00738	0.01715	0.037810002	0.02005	0.02602	0.03602	0.045030002	0.047600001	0.050889999	0.05359	0.026472	0.013168
75.5	0.069140002	0.051290002	0.079839997	0.01109	0.025979999	0.053520001	0.02211	0.029680001	0.039069999	0.047460001	0.051059999	0.05404	0.056219999	0.023498001	0.011246
76.5	0.074879996	0.061069999	0.089110002	0.01701	0.03627	0.068269998	0.024909999	0.033089999	0.042040002	0.051070001	0.05201	0.055849999	0.056219999	0.021248	0.009012
77.5	0.078649998	0.070390001	0.092419997	0.024590001	0.049430002	0.082939997	0.027410001	0.036520001	0.045449998	0.052439999	0.054249998	0.05658	0.057470001	0.018538	0.007128
78.5	0.078730002	0.079489999	0.091729999	0.034340002	0.06123	0.093209997	0.030789999	0.039009999	0.04764	0.053429998	0.055470001	0.05632	0.057610001	0.015764	0.00584
79.5	0.077119999	0.084169999	0.085759997	0.046330001	0.072669998	0.098300003	0.03379	0.041390002	0.047820002	0.05311	0.054249998	0.05449	0.055489998	0.013738	0.00465
80.5	0.071879998	0.085359998	0.077140003	0.057270002	0.083190002	0.098119996	0.036109999	0.044580001	0.05057	0.052209999	0.05184	0.052439999	0.051819999	0.011798	0.0035
81.5	0.064309999	0.082769997	0.06442	0.069449998	0.092210002	0.092759997	0.039190002	0.045060001	0.050299998	0.051029999	0.049600001	0.050360002	0.047090001	0.010006	0.002698
82.5	0.054790001	0.076190002	0.05218	0.079889998	0.093089998	0.081370004	0.04081	0.047759999	0.049460001	0.047899999	0.045990001	0.04363	0.043609999	0.008422	0.002034
83.5	0.044769999	0.067769997	0.039299998	0.08952	0.090939999	0.067359999	0.043120001	0.047219999	0.04789	0.044629999	0.042580001	0.039889999	0.038240001	0.006836	0.001576
84.5	0.034929998	0.057560001	0.02885	0.092479996	0.084190004	0.05311	0.044380002	0.04916	0.04566	0.039870001	0.03937	0.035879999	0.033259999	0.00577	0.001156
85.5	0.026830001	0.045559999	0.020339999	0.092100002	0.071630001	0.039360002	0.046300001	0.046050001	0.04366	0.035470001	0.033550002	0.02915	0.02816	0.004432	0.000912
86.5	0.019370001	0.03517	0.01228	0.088540003	0.058139998	0.02685	0.045510001	0.045249999	0.039980002	0.031860001	0.029340001	0.02468	0.022290001	0.003706	0.000596
87.5	0.0123	0.024940001	0.00744	0.075819999	0.046089999	0.01812	0.045559999	0.043200001	0.037009999	0.02713	0.02345	0.020330001	0.01835	0.002938	0.000516
88.5	0.00752	0.01706	0.00419	0.062660001	0.033679999	0.01036	0.045019999	0.04259	0.033050001	0.023290001	0.019479999	0.016799999	0.01416	0.002226	0.000358
89.5	0.0049	0.01156	0.00233	0.048209999	0.02241	0.00621	0.04386	0.0361	0.02854	0.018580001	0.015830001	0.01252	0.01082	0.001802	0.000216
90.5	0.00271	0.00669	0.00121	0.034529999	0.01437	0.00334	0.040800001	0.034090001	0.024669999	0.01518	0.01254	0.00936	0.00807	0.00138	0.00013
91.5	0.00158	0.00452	0.00069	0.02328	0.00891	0.00185	0.03743	0.031339999	0.020780001	0.01173	0.00904	0.00685	0.00645	0.001004	0.000102
92.5	0.00087	0.00213	0.00021	0.01458	0.00524	0.00081	0.035089999	0.02616	0.017030001	0.00831	0.00725	0.00518	0.00428	0.000752	7.60E-05
93.5	0.00039	0.00127	7.00E-05	0.00917	0.00245	0.00035	0.03167	0.022399999	0.01325	0.0063	0.00524	0.00349	0.00282	0.000584	5.00E-05
94.5	0.0002	0.00062	9.00E-05	0.00529	0.00128	0.00016	0.027410001	0.018510001	0.01038	0.00457	0.00352	0.00252	0.00182	0.000506	3.20E-05
95.5	1.00E-04	0.00024	2.00E-05	0.00307	0.00057	9.00E-05	0.023630001	0.01531	0.00888	0.00335	0.00211	0.00139	0.0012	0.000332	1.80E-05
96.5	3.00E-05	7.00E-05	2.00E-05	0.00159	0.00033	2.00E-05	0.02122	0.01239	0.0064	0.00222	0.00175	0.00082	0.00095	0.000292	1.40E-05
97.5	3.00E-05	4.00E-05	0	0.00078	8.00E-05	0	0.01825	0.01024	0.00492	0.00162	0.00107	0.0006	0.00073	0.00015	6.00E-06
98.5	2.00E-05	1.00E-05	0	0.00042	7.00E-05	1.00E-05	0.01537	0.00805	0.00339	0.00099	0.00076	0.00036	0.00029	0.000156	6.00E-06
99.5	1.00E-05	0	0	0.00017	1.00E-05	0	0.01268	0.00601	0.0023	0.00065	0.00029	0.00021	0.00019	8.60E-05	8.00E-06
100.5	0	0	0	3.00E-05	1.00E-05	0	0.01021	0.00494	0.00161	0.0004	0.00028	0.00013	0.00013	6.40E-05	0
101.5	0	0	0	6.00E-05	1.00E-05	0	0.00833	0.00395	0.0013	0.00031	0.0002	7.00E-05	8.00E-05	4.00E-05	0
102.5	1.00E-05	0	0	2.00E-05	0	0	0.00671	0.0025	0.00092	0.00027	5.00E-05	7.00E-05	7.00E-05	3.80E-05	2.00E-06
103.5	0	0	0	2.00E-05	0	0	0.00575	0.00192	0.00057	7.00E-05	4.00E-05	0	5.00E-05	2.40E-05	2.00E-06
1.05E+02	0	0	0	0	0	0	0.00449	0.00166	0.00036	4.00E-05	3.00E-05	4.00E-05	3.00E-05	1.40E-05	0
1.06E+02	0	0	0	0	0	0	0.00345	0.00116	0.00029	8.00E-05	6.00E-05	0	1.00E-05	6.00E-06	0
1.07E+02	0	0	0	0	0	0	0.00274	0.00092	0.00013	2.00E-05	1.00E-05	3.00E-05	0	1.60E-05	0
1.08E+02	0	0	0	0	0	0	0.00231	0.00054	0.00021	5.00E-05	0	1.00E-05	0	4.00E-06	0
1.09E+02	0	0	1.00E-05	0	0	0	0.00172	0.00043	1.00E-04	1.00E-05	0	0	1.00E-05	4.00E-06	0
109.5	0	0	0	0	0	0	0.00125	0.00033	6.00E-05	1.00E-05	0	0	0	0	0
110.5	0	0	0	0	0	0	0.00107	0.00025	7.00E-05	0	1.00E-05	0	0	0	0
111.5	0	0	0	0	0	0	0.00078	0.00018	2.00E-05	1.00E-05	0	0	0	0	0
112.5	0	0	0	0	0	0	0.00044	8.00E-05	1.00E-05	1.00E-05	1.00E-05	0	0	0	0
113.5	0	0	0	0	0	0	0.00041	0.00012	1.00E-05	0	0	0	0	0	0
114.5	0	0	0	0	0	0	0.00034	7.00E-05	0	1.00E-05	0	0	0	2.00E-06	0
115.5	0	0	0	0	0	0	0.00028	5.00E-05	1.00E-05	0	0	0	0	0	0
116.5	0	0	0	0	0	0	0.00021	1.00E-05	0	0	0	0	0	0	0
117.5	0	0	0	0	0	0	0.00022	3.00E-05	0	0	0	0	0	0	0
118.5	0	0	0	0	0	0	0.00016	2.00E-05	0	0	0	0	0	0	0
119.5	0	0	0	0	0	0	1.00E-04	0	0	0	0	0	0	0	0
120.5	0	0	0	0	0	0	1.00E-04	1.00E-05	0	0	0	0	0	0	0
121.5	0	0	0	0	0	0	3.00E-05	1.00E-05	1.00E-05	0	0	0	0	0	0
122.5	0	0	0	0	0	0	8.00E-05	0	0	0	0	0	0	0	0
123.5	0	0	0	0	0	0	0.00012	0	0	0	0	0	0	0	0
124.5	0	0	0	0	0	0	6.00E-05	0	0	0	0	0	0	0	0
125.5	0	0	0	0	0	0	8.00E-05	1.00E-05	0	0	0	0	1.00E-05	0	0
126.5	0	0	0	0	0	0	1.00E-05	0	0	0	1.00E-05	0	0	0	0
127.5	0	0	0	0	0	0	0	0	0	0	0	0	0	0	0
128.5	0	0	0	0	0	0	0	0	0	0	0	0	0	0	0
129.5	0	0	0	0	0	0	0	0	0	0	0	0	0	0	0
130.5	0	0	0	0	0	0	1.00E-05	0	1.00E-05	0	0	0	0	0	0
131.5	0	0	0	0	0	0	1.00E-05	0	0	0	0	0	0	0	0
132.5	0	0	0	0	0	0	1.00E-05	0	0	0	0	0	0	0	0
133.5	0	0	0	0	0	0	1.00E-05	0	0	0	0	0	0	0	0
134.5	0	0	0	0	0	0	0	0	0	0	0	0	0	0	0
135.5	0	0	0	0	0	0	0	0	0	0	0	0	0	0	0
136.5	0	0	0	0	0	0	0	0	0	0	0	0	0	0	0
137.5	0	0	0	0	0	0	0	0	0	0	0	0	0	0	0
138.5	0	0	0	0	0	0	0	0	0	0	0	0	0	0	0
139.5	0	0	0	0	0	0	0	0	0	0	0	0	0	0	0
140.5	0	0	0	0	0	0	0	0	0	0	0	0	0	0	0
141.5	0	0	0	0	0	0	0	0	0	0	0	0	0	0	0
142.5	0	0	0	0	0	0	0	0	0	0	0	0	0	0	0
143.5	0	0	0	0	0	0	0	0	0	0	0	0	0	0	0
144.5	0	0	0	0	0	0	0	0	0	0	0	0	0	0	0
145.5	0	0	0	0	0	0	0	0	0	0	0	0	0	0	0
146.5	0	0	0	0	0	0	0	0	0	0	0	0	0	0	0
147.5	0	0	0	0	0	0	0	0	0	0	0	0	0	0	0
148.5	0	0	0	0	0	0	0	0	0	0	0	0	0	0	0
149.5	0	0	0	0	0	0	0	0	0	0	0	0	0	0	0
150.5	0	0	0	0	0	0	0	0	0	0	0	0	0	0	0
151.5	0	0	0	0	0	0	0	0	0	0	0	0	0	0	0
152.5	0	0	0	0	0	0	0	0	0	0	0	0	0	0	0
153.5	0	0	0	0	0	0	0	0	0	0	0	0	0	0	0
154.5	0	0	0	0	0	0	0	0	0	0	0	0	0	0	0
155.5	0	0	0	0	0	0	0	0	0	0	0	0	0	0	0
156.5	0	0	0	0	0	0	0	0	0	0	0	0	0	0	0
157.5	0	0	0	0	0	0	0	0	0	0	0	0	0	0	0
158.5	0	0	0	0	0	0	0	0	0	0	0	0	0	0	0
159.5	0	0	0	0	0	0	0	0	0	0	0	0	0	0	0
160.5	0	0	0	0	0	0	0	0	0	0	0	0	0	0	0
161.5	0	0	0	0	0	0	0	0	0	0	0	0	0	0	0
162.5	0	0	0	0	0	0	0	0	0	0	0	0	0	0	0
163.5	0	0	0	0	0	0	0	0	0	0	0	0	0	0	0
164.5	0	0	0	0	0	0	0	0	0	0	0	0	0	0	0
165.5	0	0	0	0	0	0	0	0	0	0	0	0	0	0	0
166.5	0	0	0	0	0	0	0	0	0	0	0	0	0	0	0
167.5	0	0	0	0	0	0	0	0	0	0	0	0	0	0	0
168.5	0	0	0	0	0	0	0	0	0	0	0	0	0	0	0
169.5	0	0	0	0	0	0	0	0	0	0	0	0	0	0	0
170.5	0	0	0	0	0	0	0	0	0	0	0	0	0	0	0
171.5	0	0	0	0	0	0	0	0	0	0	0	0	0	0	0
172.5	0	0	0	0	0	0	0	0	0	0	0	0	0	0	0
173.5	0	0	0	0	0	0	0	0	0	0	0	0	0	0	0
174.5	0	0	0	0	0	0	0	0	0	0	0	0	0	0	0
175.5	0	0	0	0	0	0	0	0	0	0	0	0	0	0	0
176.5	0	0	0	0	0	0	0	0	0	0	0	0	0	0	0
177.5	0	0	0	0	0	0	0	0	0	0	0	0	0	0	0
178.5	0	0	0	0	0	0	0	0	0	0	0	0	0	0	0
179.5	0	0	0	0	0	0	0	0	0	0	0	0	0	0	0
180.5	0	0	0	0	0	0	0	0	0	0	0	0	0	0	0
0
