# Supplementary material for: Topoisomerase VI is a chirally-selective, preferential DNA decatenase
Source: eLife. 2022 Jan 25;11:e67021. doi: 10.7554/eLife.67021 (PMC8837201; doi:10.7554/eLife.67021)
Supplement: Figure 8—source data 1. [file elife-67021-fig8-data1.csv]

Imposed_Angle_BD	Preferred_Angle_BD	Preferred_Angle_Error_BD
73.7192	83.5	4.175
79.9291	85	4.25
79.6461	87.75	4.3875
80.0481	88.5	4.425
81.9058	85.75	4.2875
83.1577	86.25	4.3125
83.2354	87.75	4.3875
84.4236	88.25	4.4125
81.8321	88.25	4.4125
82.1815	88.25	4.4125
81.9687	87.75	4.3875
84.1173	88.25	4.4125
83.8223	89.75	4.4875
81.2732	88.75	4.4375
